# Supplementary material for: Presenilin-2 interacts with Lamtor1 at late endosome/lysosome-endoplasmic reticulum contact sites to guard endolysosomal homeostasis
Source: Research Square preprint supplement (doi:10.21203/rs.3.rs-8068059/v1), 2025-11-12
Supplement: Supplementary file 1 [file cc6d458b298516bd43aab7dd.pdf]

**a****isotonic**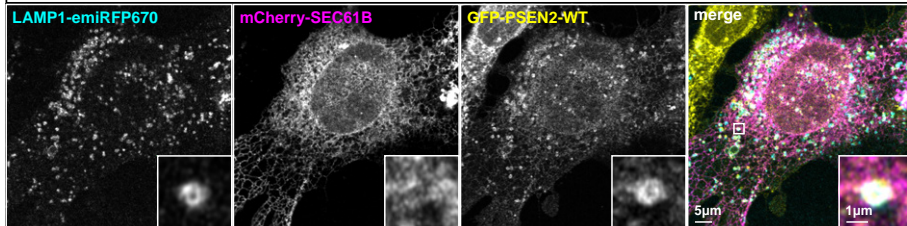**b****hypotonic**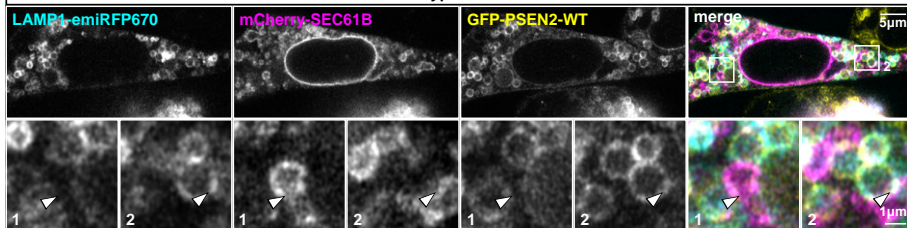

**Supplementary Figure 1. PSEN2 localizes on LAMP1 organelles, at LE/Lys-ER contacts. a–b.** Live-cell Airyscan imaging of PSEN-deficient MEFs expressing LAMP1-emiRFP670, mCherry-SEC61B and GFP-PSEN2-WT reveals that GFP-PSEN2 resides on LAMP1+ organelles closely apposed to the ER in isotonic conditions (**a**); hypotonic swelling highlights narrow MCSs (**b**).

**a**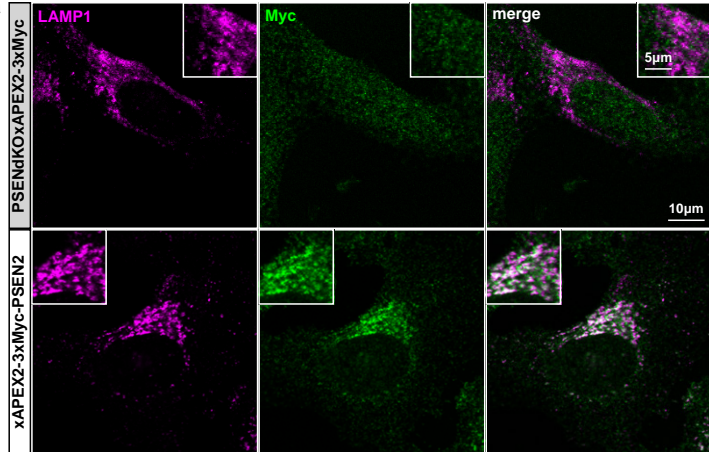**b**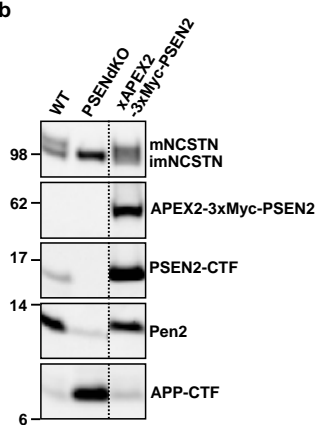

**Supplementary Figure 2. APEX2-3xMyc tagging preserves PSEN2 localization, complex formation, and catalytic activity.** **a.** Immunolabeling of fixed PSEN1/2 double-knockout (PSENdKO) HeLa cells expressing soluble APEX2-3xMyc or APEX2-3xMyc-PSEN2 confirmed that the APEX2-3xMyc tag does not interfere with proper subcellular localization of PSEN2 to LAMP1+ LE/Lys. **b.** HeLa wild-type (WT) cells were compared to PSENdKO and PSENdKOxAPEX2-3xMyc-PSEN2 cells; maturation of the  $\gamma$ -secretase subunit nicastrin (NCSTN), stabilization of the  $\gamma$ -secretase subunit Pen2, and cleavage of the  $\gamma$ -secretase substrate APP-CTF were restored upon APEX2-3xMyc-PSEN2 expression, indicating that the APEX2-3xMyc tag does not interfere with PSEN2's catalytic function. Dashed lines separate non-adjacent lanes from the same blot.

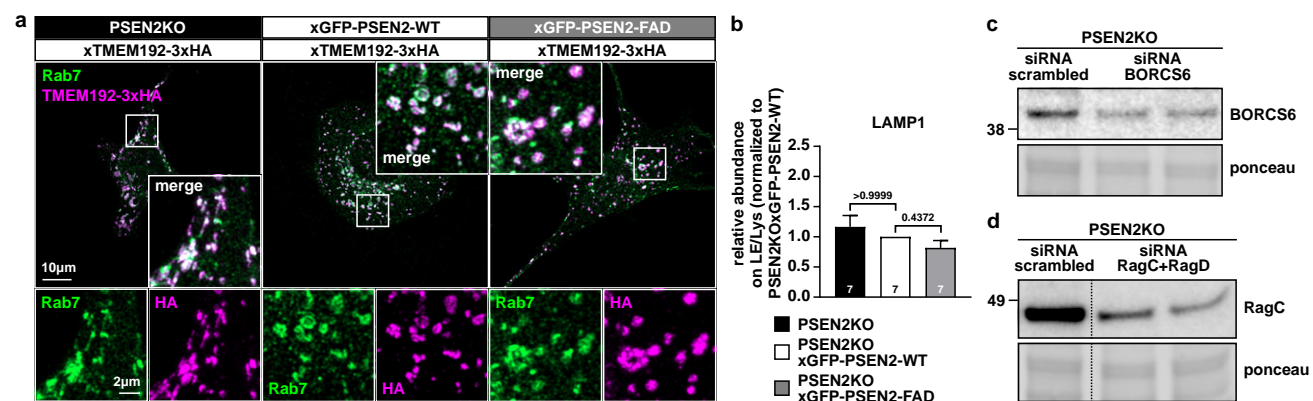

**Supplementary Figure 3. TMEM192-3xHA fusion proteins localize to LE/Lys and enable comparable LysoIP efficiency across PSEN2 genotypes.** **a.** Cell lines used for LysoIP (MEF PSEN2KO, PSEN2KOxGFP-PSEN2-WT and PSEN2KOxGFP-PSEN2-FAD transduced with TMEM192-3xHA) were assessed for subcellular localization. Super-resolution Airyscan imaging confirmed TMEM192-fusion proteins localize to Rab7+ LE/Lys. **b.** LysoIP samples were quantified for LAMP1 enrichment vs PNS to verify comparable LE/Lys isolation efficiency between genotypes relative to PSEN2KOxGFP-PSEN2-WT. Data are mean with S.E.M., n as indicated in the figure, corresponding to N=7 independent experiments. According to data distribution normality, statistical significance was assessed with the Kruskal-Willis test and Dunn's multiple comparisons test, where the mean of each column was compared to the mean of the control column (PSEN2KOxGFP-PSEN2-WT). **c–d.** Western blot validation of siRNA-mediated knockdown in MEF PSEN2KO for **(c)** BORCS6 or **(d)** RagC/RagD, compared to scrambled siRNA control. RagC immunoblot reflects the combined depletion of RagC and RagD. Dashed lines separate non-adjacent lanes from the same blot.

**a**

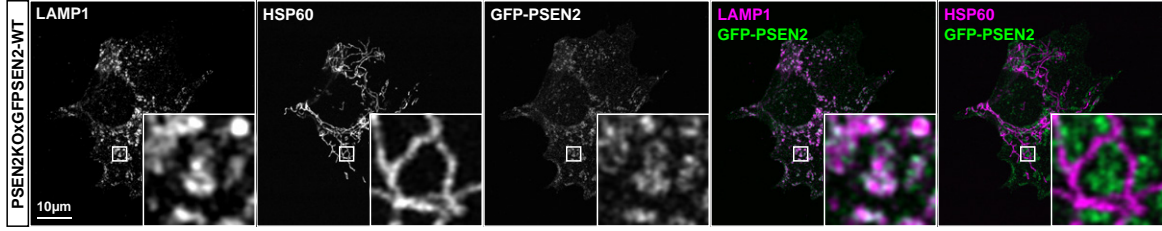

**Supplementary Figure 4. PSEN2 localizes to LE/Lys, not mitochondria. a.** MEF PSEN2KO cells stably expressing GFP-PSEN2 were fixed and co-stained for late endosomal/lysosomal marker LAMP1 and mitochondrial marker HSP60. Super-resolution Airyscan imaging shows perfect overlap of GFP-PSEN2 with LAMP1, but no overlap with HSP60.



### **Supplementary Movies Legends**

**Supplementary Movie 1. LE/Lys and ER dynamics in PSEN2-WT cells.** Live-cell imaging of LysoTracker+ organelles (magenta) and ER (green) in PSEN2-WT expressing cells. LysoTracker+ organelles are highly motile, while ER tubules undergo constant reshaping. Related to Fig. 1g.

**Supplementary Movie 2. ‘Sliding’ LE/Lys-ER contacts in PSEN2-WT cells.** LysoTracker+ organelles (magenta) slide along ER tubules (green) to change position. Related to Fig. 1h(i).

**Supplementary Movie 3. ‘Dragging’ LE/Lys-ER contacts in PSEN2-WT cells.** LysoTracker+ organelles (magenta) appear to drag ER tubules (green) to new locations. Related to Fig. 1h(ii).

**Supplementary Movie 4. Reduced LE/Lys motility and enlarged contacts in PSEN2KO cells.** In PSEN2KO cells, LysoTracker+ organelles (magenta) are less motile and appear trapped within the ER network (green), with increased contact site size. Related to Fig. 1i.

**Supplementary Movie 5. Immobile LE/Lys surrounded by ER sheets in PSEN2KO cells (example 1).** LE/Lys (magenta) remain stationary and are surrounded by ER sheets (green). Related to Fig. 1j(i).

**Supplementary Movie 6. Immobile LE/Lys surrounded by ER sheets in PSEN2KO cells (example 2).** A second example of stationary LE/Lys (magenta) enveloped by ER sheets (green). Related to Fig. 1j(ii).

**Supplementary Movie 7. Nutrient-driven redistribution of LE/Lys in PSEN2-WT cells.** Live-cell imaging of LysoTracker+ organelles in PSEN2-WT-expressing MEFs. Upon refeeding after 1h amino acid and serum starvation, perinuclear LE/Lys progressively redistribute towards the cell periphery. Related to Fig. 3e.

**Supplementary Movie 8. Altered nutrient-driven LE/Lys positioning in PSEN2KO cells.** Live-cell imaging of LysoTracker+ organelles in PSEN2KO MEFs. Following refeeding after 1h amino acid and serum starvation, LE/Lys remain clustered in peripheral regions irrespective of nutrient availability. Related to Fig. 4b.

**Supplementary Movie 9. Growth cone dynamics in WT neurons.** Live-cell brightfield imaging of a representative WT mouse primary neuron from 5h to 14h30 post-plating, acquired at 30min intervals and displayed at 3 frames per second. Related to Supplementary Fig. 4a.

**Supplementary Movie 10. Growth cone dynamics in PSEN2KO neurons.** Live-cell brightfield imaging of a representative PSEN2KO mouse primary neuron from 5h to 14h30 post-plating, acquired at 30min intervals and displayed at 3 frames per second. Related to Supplementary Fig. 4b.

**Supplementary Movie 11. Growth cone dynamics in PSEN2-FAD neurons.** Live-cell brightfield imaging of a representative PSEN2-FAD mouse primary neuron from 5h to 14h30 post-plating, acquired at 30min intervals and displayed at 3 frames per second. Related to Supplementary Fig. 4c.
