# Supplementary material for: Presenilin-2 interacts with Lamtor1 at late endosome/lysosome-endoplasmic reticulum contact sites to guard endolysosomal homeostasis
Source: Research Square preprint supplement (doi:10.21203/rs.3.rs-8068059/v1), 2025-11-12
Supplement: Supplementary file 1 [file e1cbf0ca6d7802c7728b789d.xlsx]

## Sheet: S3 APEX Volcano CtrlvsPSEN2
Significant	-LOG(P-value)	Log2 (PSEN2/ Ctrl)	Protein IDs	Majority protein IDs	Protein names	Gene names	LFQ intensity APEX2_PSEN2_rep1	LFQ intensity APEX2_PSEN2_rep2	LFQ intensity APEX2_PSEN2_rep3	LFQ intensity APEX2_PSEN2_rep4	LFQ intensity Ctrl_APEX2_rep1	LFQ intensity Ctrl_APEX2_rep2	LFQ intensity Ctrl_APEX2_rep3	LFQ intensity Ctrl_APEX2_rep4	id	Peptides	Razor + unique peptides	Unique peptides	Sequence coverage [%]	Unique + razor sequence coverage [%]	Unique sequence coverage [%]	Mol. weight [kDa]	Q-value	Score	Intensity	MS/MS count	iBAQ	iBAQ APEX2_PSEN2_rep1	iBAQ APEX2_PSEN2_rep2	iBAQ APEX2_PSEN2_rep3	iBAQ APEX2_PSEN2_rep4	iBAQ Ctrl_APEX2_rep1	iBAQ Ctrl_APEX2_rep2	iBAQ Ctrl_APEX2_rep3	iBAQ Ctrl_APEX2_rep4
+	1.81256	4.77871	P62745;P61586;P08134	P62745;P61586;P08134	Rho-related GTP-binding protein RhoB;Transforming protein RhoA;Rho-related GTP-binding protein RhoC	RHOB;RHOA;RHOC	25.6658	24.8085	24.7495	25.5052	20.0194	24.3786	17.7894	19.4269	436	2	2	2	14.3	14.3	14.3	22.123	0	34.482	473060000	15	52562000	13261000	5914800	10324000	9144300	1486600	4027900	3839000	4564800
+	3.00262	3.6713	P60903	P60903	Protein S100-A10	S100A10	21.9321	22.1076	23.0891	23.27	20.3612	18.8709	17.9527	18.5289	396	2	2	2	17.5	17.5	17.5	11.203	0	15.987	46750000	12	11688000	757290	742980	2580700	2887400	636950	1631900	690350	1760100
+	4.14997	3.34111	P11279	P11279	Lysosome-associated membrane glycoprotein 1	LAMP1	21.87	22.3462	22.5938	22.9833	19.6771	18.5829	18.7807	19.3881	184	2	2	2	4.3	4.3	4.3	44.882	0.0016892	12.038	25470000	3	1340500	113000	182490	506800	435730	0	19791	20876	61862
+	2.8981	3.19373	Q92542	Q92542	Nicastrin	NCSTN	22.0772	22.4432	22.9785	22.758	18.9621	18.2093	20.6865	19.6241	650	4	4	4	5.5	5.5	5.5	78.41	0	24.029	28517000	11	919910	108510	122860	306200	300210	13542	12133	15643	40819
+	2.47847	2.80753	APEX2	APEX2			22.3696	22.903	24.5656	22.9554	20.8236	20.7704	19.3078	20.6617	3	6	6	6	28.9	28.9	28.9	26.893	0	56.161	49534000	11	3538200	535460	557750	1224200	1083300	29674	43538	18304	45940
+	2.68126	2.70298	P09382	P09382	Galectin-1	LGALS1	21.1549	21.5063	22.1015	22.4943	19.2491	18.2548	20.2453	18.6959	163	3	3	3	25.2	25.2	25.2	14.716	0	17.638	30213000	14	3357000	232280	228010	479820	595830	212080	626570	247700	734730
+	2.32581	2.63895	Q9NVJ2	Q9NVJ2	ADP-ribosylation factor-like protein 8B	ARL8B	21.1933	21.4447	22.3505	21.6885	20.5577	18.224	18.2266	19.1129	728	2	2	1	17.2	17.2	4.8	21.539	0.0015649	11.389	14270000	10	1297300	144060	172100	488500	446980	0	0	0	45634
+	0.743825	2.605	P62913	P62913	60S ribosomal protein L11	RPL11	24.714	18.9945	24.4018	24.5346	19.1301	19.5717	23.5418	19.9814	450	2	2	2	12.9	12.9	12.9	20.252	0	40.167	178060000	21	17806000	2165300	1632600	2218000	2146300	2154300	2372300	1783800	3333300
+	2.0674	2.41928	Q9HB90;Q9NQL2	Q9HB90;Q9NQL2	Ras-related GTP-binding protein C;Ras-related GTP-binding protein D	RRAGC;RRAGD	20.9542	22.2855	22.8931	23.9138	19.7325	20.1679	20.2309	20.2381	712	5	5	5	14.5	14.5	14.5	44.223	0	34.918	39816000	19	2095600	100540	220940	688460	813650	13683	90312	28253	139730
+	2.26777	2.15911	Q6IAA8	Q6IAA8	Ragulator complex protein LAMTOR1	LAMTOR1	21.7961	22.7212	23.6184	23.7207	20.2496	21.3825	20.6607	20.9272	594	5	5	5	50.9	50.9	50.9	17.745	0	35.114	48076000	18	5341800	358220	516310	1706300	1805700	76849	331100	120910	426420
+	3.40399	2.09141	P49810	P49810	Presenilin-2;Presenilin-2 NTF subunit;Presenilin-2 CTF subunit	PSEN2	20.4387	21.0184	21.2544	20.9663	19.217	18.2945	19.248	18.5525	349	2	2	2	7.1	7.1	7.1	50.14	0	26.152	7659400	4	425520	50636	79181	153390	142310	0	0	0	0
+	2.79092	2.00835	P35354;P23219	P35354	Prostaglandin G/H synthase 2	PTGS2	26.2548	26.0692	25.3919	25.5332	24.5956	23.2847	23.9775	23.3578	298	11	11	11	24.5	24.5	24.5	68.995	0	280.32	281700000	67	8536300	1955400	1315100	1614400	1596500	688290	436980	432040	497630
+	1.58159	2.00802	O75348;O95670	O75348;O95670	V-type proton ATPase subunit G 1;V-type proton ATPase subunit G 2	ATP6V1G1;ATP6V1G2	19.6272	20.0538	22.232	22.0996	18.7821	19.0684	18.8921	19.2379	84	2	2	2	22	22	22	13.757	0	22.445	14626000	6	2089400	137250	176890	663700	577960	76578	148260	75409	233340
+	1.92709	1.80869	Q9NP58	Q9NP58	ATP-binding cassette sub-family B member 6, mitochondrial	ABCB6	20.4196	20.8824	22.556	21.4035	18.9447	19.5913	19.9818	19.509	716	5	5	5	9.7	9.7	9.7	93.884	0	36.207	15132000	9	408990	40352	46419	156960	135030	0	8288.2	9373.7	12566
+	0.840166	1.76224	P62899	P62899	60S ribosomal protein L31	RPL31	21.7073	22.45	21.4106	17.8881	18.6302	18.987	18.917	19.873	448	2	2	2	17.6	17.6	17.6	14.463	0	12.869	12464000	5	1780600	408350	475220	447720	141230	0	37095	21150	249850
+	2.30261	1.57849	O75027	O75027	ATP-binding cassette sub-family B member 7, mitochondrial	ABCB7	21.0184	20.8573	20.6893	20.6829	20.0562	19.5404	18.4274	18.91	79	2	2	2	3.1	3.1	3.1	82.64	0.0016313	11.684	10403000	4	305980	51167	32506	61875	50617	23994	26725	21743	37349
+	1.13082	1.55065	P38606	P38606	V-type proton ATPase catalytic subunit A	ATP6V1A	18.4181	20.6541	21.0545	20.9918	18.8418	19.3718	17.7367	18.9657	307	2	2	2	3.4	3.4	3.4	68.303	0.001548	11.318	7360300	4	216480	6075.6	30316	72681	73049	0	9339.6	5918.8	19099
+	1.26187	1.49105	O00161	O00161	Synaptosomal-associated protein 23	SNAP23	21.0674	21.4904	21.6623	21.6324	18.3896	20.6686	19.6735	21.1565	26	4	4	4	26.5	26.5	26.5	23.354	0	29.865	18237000	8	1519700	170650	148440	363000	339470	54291	149330	38578	255960
+	2.91522	1.41793	Q13085	Q13085	Acetyl-CoA carboxylase 1;Biotin carboxylase	ACACA	32.3867	32.3871	32.0597	31.9431	31.2662	30.5167	31.0095	30.3125	518	100	100	84	49.1	49.1	42.2	265.55	0	323.31	27955000000	3498	232960000	37138000	31521000	46612000	41046000	20725000	19049000	16175000	20691000
+	1.76756	1.35577	P69905	P69905	Hemoglobin subunit alpha	HBA1	28.5848	28.8739	27.9966	28.1331	27.8995	26.4721	27.3819	26.4119	468	4	4	2	25.4	25.4	19	15.257	0	187.39	2000000000	116	250000000	36894000	37052000	43301000	39978000	49111000	15439000	9588100	18633000
+	1.44756	1.34355	Q71DI3;Q16695;P84243;P68431;Q6NXT2	Q71DI3;Q16695;P84243;P68431;Q6NXT2	Histone H3.2;Histone H3.1t;Histone H3.3;Histone H3.1;Histone H3.3C	HIST2H3A;HIST3H3;H3F3A;HIST1H3A;H3F3C	23.0724	23.4911	24.7439	24.6407	22.1901	22.6814	22.3033	23.3991	467	3	3	3	16.9	16.9	16.9	15.388	0	41.463	114120000	23	28529000	1890000	2306300	7756400	7164100	1258300	2294900	1143800	4715600
+	4.0107	1.33791	P32004	P32004	Neural cell adhesion molecule L1	L1CAM	24.4142	24.3941	24.182	24.0659	22.6273	23.0821	23.1538	22.8414	283	11	11	11	11.9	11.9	11.9	140	0	88.322	112180000	36	2077300	291120	287290	447650	398820	102440	210800	138270	200950
+	2.40606	1.30454	P49257	P49257	Protein ERGIC-53	LMAN1	25.6783	25.4523	24.9858	25.0559	24.4586	23.6389	24.3252	23.5314	344	9	9	9	20.8	20.8	20.8	57.548	0	96.296	239140000	64	11957000	2010700	1381100	2043000	1939400	1242100	1069400	1015900	1255300
+	1.15643	1.29035	P16070	P16070	CD44 antigen	CD44	21.5332	21.5927	22.1664	22.1882	18.9108	21.2552	21.0721	21.081	209	3	3	3	4.6	4.6	4.6	81.537	0	26.704	25930000	5	960380	104870	85429	193270	177370	53362	138080	57226	150790
+	0.783573	1.27811	Q9GZY8	Q9GZY8	Mitochondrial fission factor	MFF	20.2379	19.3782	21.2424	21.6381	18.5053	19.6592	18.2368	20.9829	701	3	3	3	10.5	10.5	10.5	38.464	0	20.01	14158000	9	707900	29927	25860	166240	196190	22095	45571	24097	197920
+	2.17401	1.24577	O60427	O60427	Fatty acid desaturase 1	FADS1	24.4951	24.7308	23.8731	23.9142	23.5052	22.576	23.2494	22.6994	70	6	6	6	14.4	14.4	14.4	51.964	0	70.101	116680000	44	5303700	875370	675160	961790	907700	366900	419300	423770	673760
+	1.86747	1.17643	O75477;O94905	O75477;O94905	Erlin-1;Erlin-2	ERLIN1;ERLIN2	23.4107	23.3577	22.6734	22.844	22.6116	21.3985	22.1018	21.4681	87	4	4	4	13	13	13	38.925	0	27.261	52879000	13	2783100	442940	265230	463550	377410	342100	256680	282750	352440
+	4.68968	1.1719	P02786	P02786	Transferrin receptor protein 1;Transferrin receptor protein 1, serum form	TFRC	24.951	24.9854	25.1321	25.2133	23.699	23.978	24.0471	23.8701	120	17	17	17	26.6	26.6	26.6	84.87	0	142.1	213210000	64	5466900	567870	595740	1282400	1242200	304970	505970	309040	658800
+	1.44959	1.13088	P62917	P62917	60S ribosomal protein L8	RPL8	24.2818	24.077	22.9383	23.2427	22.9178	21.9118	22.9886	22.1982	451	3	3	3	13.2	13.2	13.2	28.024	0	22.252	77225000	24	7722500	1442700	1105400	1004200	1269000	696040	561600	740770	902870
+	3.53237	1.11726	P14923;P35222	P14923	Junction plakoglobin	JUP	24.2348	24.5262	23.9509	23.9989	23.1959	22.8632	23.0882	23.0944	203	9	9	9	14.4	14.4	14.4	81.744	0	78.892	112850000	30	2453300	330100	320320	402830	451310	197980	227960	168150	354600
+	1.19859	1.0977	Q96D46	Q96D46	60S ribosomal export protein NMD3	NMD3	20.8055	20.8773	20.3388	19.9945	20.1152	19.7118	18.1349	19.6635	673	2	2	2	5	5	5	57.603	0.0015924	11.465	11028000	5	424160	51989	38608	74569	69040	45832	47947	36332	59843
+	1.97889	1.03108	P01111	P01111	GTPase NRas	NRAS	21.0464	21.2001	22.0127	22.1559	20.6207	20.5476	20.5535	20.5691	117	3	3	1	16.9	16.9	4.8	21.229	0	19.34	21052000	7	2105200	215200	211460	489550	348420	90465	249960	157370	342810
+	1.64585	1.02272	P51149	P51149	Ras-related protein Rab-7a	RAB7A	23.7624	24.5313	24.9303	25.0083	23.0321	23.7839	23.5412	23.7843	358	9	9	9	52.7	52.7	52.7	23.489	0	139.14	173840000	61	12417000	752700	865820	2939200	3022600	544750	1629800	933130	1729100
+	1.44077	1.00689	Q02878	Q02878	60S ribosomal protein L6	RPL6	26.3852	26.1998	25.3557	25.3565	25.3141	24.4169	25.2056	24.3332	490	12	12	12	44.1	44.1	44.1	32.728	0	185.52	345350000	78	26565000	5817600	4338600	3345900	3580700	2716500	2177600	2123700	2464600
+	1.70837	0.996782	Q969V3	Q969V3	Nicalin	NCLN	21.1608	20.7264	21.2263	20.7411	19.3888	19.917	20.7534	19.8083	665	4	4	4	8.5	8.5	8.5	62.974	0	24.142	13353000	6	534130	79686	31840	114620	78250	22876	68047	58022	80790
+	2.05391	0.968255	P09543	P09543	2,3-cyclic-nucleotide 3-phosphodiesterase	CNP	20.0605	20.3811	20.2685	20.2557	19.5511	19.8205	18.9016	18.8196	164	2	2	2	4.8	4.8	4.8	47.578	0.0015773	11.428	5031500	3	186350	27424	33385	56406	52299	0	10193	6645.9	0
	0.646308	0.953617	Q9BUN8	Q9BUN8	Derlin-1	DERL1	19.3478	22.6102	21.7499	21.5512	20.5609	19.993	20.5079	20.3828	693	2	2	2	7.6	7.6	7.6	28.8	0.0017007	12.106	18678000	10	1698000	0	327110	380570	322980	151230	144200	148440	223430
+	2.78635	0.94618	P05556	P05556	Integrin beta-1	ITGB1	23.8332	23.6822	24.1239	24.211	22.675	23.2128	22.9961	23.1816	139	5	5	5	6.9	6.9	6.9	88.414	0	48.203	113180000	25	3328800	171320	246440	734380	756640	229040	527970	194980	468050
+	1.70285	0.918044	P10301	P10301	Ras-related protein R-Ras	RRAS	20.6375	21.0796	21.2395	20.8231	19.2529	20.2581	20.2467	20.3499	171	2	2	1	10.6	10.6	5.5	23.48	0	12.761	13785000	9	919030	78822	102320	190130	142580	58699	113420	68914	164150
+	3.2577	0.900902	Q00325	Q00325	Phosphate carrier protein, mitochondrial	SLC25A3	24.6359	24.5816	24.4601	24.2113	23.7485	23.3918	23.7286	23.4165	478	3	3	3	7.7	7.7	7.7	40.094	0	38.277	147740000	29	8207500	1115000	834790	1456700	1207600	826190	885450	693510	1188200
+	2.50435	0.889064	P35268	P35268	60S ribosomal protein L22	RPL22	23.928	24.0508	23.6502	23.6598	23.0951	22.7489	23.29	22.5985	296	2	2	2	18.8	18.8	18.8	14.787	0	17.77	93862000	15	23466000	2913800	2633100	3702600	3468500	2403400	2702800	2423600	3217700
+	3.5751	0.885996	O15427	O15427	Monocarboxylate transporter 4	SLC16A3	22.6212	22.6987	23.0073	22.6915	22.0739	21.817	21.8838	21.7001	50	3	3	3	8.4	8.4	8.4	49.469	0	27.336	45624000	14	2534700	255790	280860	619730	472420	221410	233600	151860	299030
	1.08245	0.87559	O60271	O60271	C-Jun-amino-terminal kinase-interacting protein 4	SPAG9	19.5155	20.0903	20.9391	20.8933	18.7702	19.8874	19.6359	19.6422	68	3	3	3	3.1	3.1	3.1	146.2	0	19.714	8321400	5	124200	0	0	36224	41934	0	16545	7199.8	22295
+	4.16669	0.848782	Q12797	Q12797	Aspartyl/asparaginyl beta-hydroxylase	ASPH	25.2592	25.0491	24.9296	24.956	24.2046	24.3202	24.1051	24.1689	513	15	15	15	28.2	28.2	28.2	85.862	0	144.5	225580000	70	7519400	959710	692500	1340000	1365700	695520	851780	569310	1044900
	1.3988	0.83562	P46779	P46779	60S ribosomal protein L28	RPL28	24.0984	24.0864	22.9962	23.4722	22.7172	22.4364	23.2853	22.8718	332	4	4	4	27	27	27	15.747	0	25.495	89362000	22	11170000	1436600	1364100	1211400	1423700	1088400	1148700	1370300	2127000
+	4.65428	0.835192	Q01650;Q9UM01;Q92536	Q01650	Large neutral amino acids transporter small subunit 1	SLC7A5	23.2706	23.3144	23.0765	23.2999	22.4173	22.3998	22.5088	22.2947	484	3	3	3	8.1	8.1	8.1	55.01	0	41.438	67426000	20	3745900	334310	310860	662790	667090	315780	514990	323170	616910
+	2.34281	0.834463	P61313	P61313	60S ribosomal protein L15	RPL15	24.6046	24.569	24.0552	24.2907	23.3982	23.266	23.9004	23.6169	411	9	9	9	40.2	40.2	40.2	24.146	0	63.772	142330000	57	12939000	1701700	1387600	1901800	2019100	1091300	1255600	1324500	2257300
+	2.0889	0.831608	P36957	P36957	Dihydrolipoyllysine-residue succinyltransferase component of 2-oxoglutarate dehydrogenase complex, mitochondrial	DLST	23.4476	23.6611	23.4124	23.3627	22.9835	22.3861	22.9889	22.1989	304	5	5	5	13.5	13.5	13.5	48.755	0	49.274	74782000	28	3251400	426990	320630	548530	483440	370060	361110	341310	399300
+	1.50823	0.829838	O75054	O75054	Immunoglobulin superfamily member 3	IGSF3	19.7789	20.1074	19.9746	20.488	19.6465	19.4739	19.4024	18.5067	80	2	2	2	2	2	2	135.19	0	13.692	6731500	4	112190	11872	14210	23744	24241	4001.3	14073	8078	11973
+	1.96039	0.818717	Q8NFJ5	Q8NFJ5	Retinoic acid-induced protein 3	GPRC5A	22.317	22.7991	23.2831	23.0936	21.9939	22.032	21.9074	22.2846	636	3	3	3	8.1	8.1	8.1	40.251	0	45.386	54409000	27	7772700	557220	619550	2004500	1521500	511530	831430	452240	1274700
	0.851361	0.813519	O96008	O96008	Mitochondrial import receptor subunit TOM40 homolog	TOMM40	21.5202	21.3115	21.4115	21.7408	19.2729	21.142	21.087	21.2279	110	2	2	2	7.2	7.2	7.2	37.893	0	15.812	21494000	8	2149400	270900	159050	381350	370500	70609	294400	167850	434700
+	2.54857	0.812358	Q9Y3L5;P61225;P10114	Q9Y3L5;P61225;P10114	Ras-related protein Rap-2c;Ras-related protein Rap-2b;Ras-related protein Rap-2a	RAP2C;RAP2B;RAP2A	21.2008	21.299	21.7735	21.2476	20.2749	20.6255	20.7471	20.6239	777	3	3	3	16.4	16.4	16.4	20.745	0	19.046	19716000	19	1643000	88366	131010	360510	237140	102360	226100	187970	309590
	1.19899	0.803575	P62805	P62805	Histone H4	HIST1H4A	23.6631	24.1983	24.8839	24.838	23.6747	23.6334	23.0448	24.016	439	5	5	5	50.5	50.5	50.5	11.367	0	88.887	187940000	51	31323000	1834900	1883900	7190600	6618500	2654500	3396500	1307100	6437100
	1.38437	0.78544	Q15165	Q15165	Serum paraoxonase/arylesterase 2	PON2	20.5615	20.3364	20.5647	20.9335	19.2233	20.2588	19.4595	20.3126	559	2	2	2	7.9	7.9	7.9	39.38	0	15.493	11604000	6	725270	77117	44590	135880	126230	53508	113560	18073	156320
+	1.86089	0.784676	P20340;Q9NRW1;Q53S08;Q14964	P20340;Q9NRW1	Ras-related protein Rab-6A;Ras-related protein Rab-6B	RAB6A;RAB6B	23.3897	23.313	24.0972	24.0618	22.7152	22.947	22.9221	23.1387	227	4	4	4	20.2	20.2	20.2	23.593	0	89.105	99817000	24	7678200	511230	565970	1450600	1486200	502730	1062800	622350	1476400
	1.20967	0.772703	P05026	P05026	Sodium/potassium-transporting ATPase subunit beta-1	ATP1B1	21.1396	21.3813	21.7501	22.102	20.1661	20.7903	20.8756	21.4502	131	3	3	3	11.9	11.9	11.9	35.061	0	19.491	23631000	8	1969200	147740	155360	327600	345700	74748	217050	186700	514310
	1.9487	0.767646	O00767	O00767	Acyl-CoA desaturase	SCD	26.0406	25.7717	25.3347	25.3566	25.0955	24.6125	25.0573	24.6677	34	4	4	4	18.7	18.7	18.7	41.522	0	134.57	380640000	60	29280000	4157900	2574500	4689400	4221600	2633600	3959200	2390400	4653500
	0.741517	0.731898	P05165	P05165	Propionyl-CoA carboxylase alpha chain, mitochondrial	PCCA	30.4714	30.2813	29.3972	28.9947	29.7473	28.4036	29.4888	28.5773	133	29	29	29	47	47	47	80.058	0	323.31	6697500000	959	145600000	28578000	19958000	19388000	14270000	19589000	11826000	14884000	17105000
	0.932706	0.724566	Q10589	Q10589	Bone marrow stromal antigen 2	BST2	22.174	23.1822	23.3947	24.0526	22.4197	22.4185	22.3793	22.6877	511	4	4	4	18.3	18.3	18.3	19.769	0	30.632	74664000	20	7466400	173080	659750	1567000	1774800	571960	855630	487140	1377100
	1.73368	0.719768	P05141;Q9H0C2	P05141	ADP/ATP translocase 2;ADP/ATP translocase 2, N-terminally processed	SLC25A5	29.1721	29.1437	28.6561	28.4906	28.412	27.891	28.3781	27.9022	132	11	11	4	32.9	32.9	14.4	32.852	0	174.69	3279500000	243	172600000	27033000	19870000	25464000	22675000	19466000	18428000	15580000	24090000
	2.13525	0.713346	P35232	P35232	Prohibitin	PHB	24.4317	24.2124	24.0413	24.1565	23.7593	23.1594	23.7802	23.2897	293	10	10	10	40.1	40.1	40.1	29.804	0	87.971	134890000	52	7494000	953620	464480	1334900	1295500	635710	856980	775230	1177500
	1.23017	0.711395	P62879;P62873;Q9HAV0;P16520	P62879;P62873;Q9HAV0;P16520	Guanine nucleotide-binding protein G(I)/G(S)/G(T) subunit beta-2;Guanine nucleotide-binding protein G(I)/G(S)/G(T) subunit beta-1;Guanine nucleotide-binding protein subunit beta-4;Guanine nucleotide-binding protein G(I)/G(S)/G(T) subunit beta-3	GNB2;GNB1;GNB4;GNB3	21.6997	21.7774	22.4431	22.6857	20.9599	21.6417	21.3594	21.7994	447	4	4	4	11.2	11.2	11.2	37.331	0	25.004	35011000	17	2693100	201000	166070	513970	556800	197340	365730	197440	494780
	1.74118	0.695963	P40429;Q6NVV1	P40429;Q6NVV1	60S ribosomal protein L13a;Putative 60S ribosomal protein L13a protein RPL13AP3	RPL13A;RPL13AP3	23.4554	23.7732	23.167	23.0598	22.6434	22.3314	23.0415	22.6553	313	5	5	5	24.1	24.1	24.1	23.577	0	34.323	71212000	27	7912500	1306700	1093100	1478100	1068500	815680	573990	710250	866140
	1.7869	0.693408	Q5T9A4	Q5T9A4	ATPase family AAA domain-containing protein 3B	ATAD3B	22.1741	21.7064	21.4644	21.4146	21.0866	21.1474	21.1077	20.6443	589	11	3	1	16.5	5.2	1.5	72.572	0	19.963	23097000	8	679330	87671	64521	126050	103460	64428	83725	57773	91698
	1.0903	0.683416	O95864	O95864	Fatty acid desaturase 2	FADS2	26.3721	26.1763	25.6852	25.3361	25.6706	24.7132	25.5059	24.9465	109	12	12	12	27.7	27.7	27.7	52.259	0	102.15	433010000	73	24056000	3351000	2001500	2560300	2077300	3927400	2984400	2968700	4185700
	1.15755	0.680536	P61769	P61769	Beta-2-microglobulin;Beta-2-microglobulin form pI 5.3	B2M	20.6771	20.7847	20.9633	21.9112	20.3142	20.674	20.0997	20.5263	416	2	2	2	16.8	16.8	16.8	13.714	0.0016722	11.932	16748000	5	2791300	225920	226720	543370	597400	182680	430560	121260	463390
	1.36914	0.680319	P62820;Q9H0U4;Q92928;P59190	P62820;Q9H0U4;Q92928	Ras-related protein Rab-1A;Ras-related protein Rab-1B;Putative Ras-related protein Rab-1C	RAB1A;RAB1B;RAB1C	23.5311	23.8772	24.5158	24.5399	23.2189	23.4715	23.3809	23.6715	440	6	6	4	34.6	34.6	25.9	22.677	0	68.525	151410000	37	10094000	730480	627750	2152100	2085200	724180	1232500	722160	1819400
	3.10953	0.674543	Q13637;O14966;P57729	Q13637	Ras-related protein Rab-32	RAB32	23.5133	23.4219	23.3479	23.1979	22.4743	22.8236	22.6512	22.8337	530	8	8	8	45.8	45.8	45.8	24.997	0	58.105	75425000	25	5387500	602060	521080	797670	794470	493490	763070	457420	958220
	1.39363	0.673085	P39023	P39023	60S ribosomal protein L3	RPL3	23.0801	23.1741	22.5332	22.7433	22.5944	21.7929	22.5523	21.8988	310	3	3	3	6.9	6.9	6.9	46.108	0	36.923	53973000	26	2840700	394930	225810	438550	521880	327390	292520	194970	444660
	1.89817	0.670297	Q99623	Q99623	Prohibitin-2	PHB2	25.789	25.7317	25.3378	25.3219	25.2152	24.5923	25.008	24.6835	685	12	12	12	45.2	45.2	45.2	33.296	0	158.4	334210000	105	15192000	1938900	1531500	2298300	2298100	1633000	1706400	1376800	2408500
	1.45497	0.669662	O00264	O00264	Membrane-associated progesterone receptor component 1	PGRMC1	22.1938	23.1504	22.8525	23.0792	21.9396	22.1757	22.4662	22.0157	27	4	4	4	25.6	25.6	25.6	21.671	0	28.494	51064000	17	6383000	559440	848230	719790	804140	594200	973110	733790	1150300
	1.5665	0.669247	P42677	P42677	40S ribosomal protein S27	RPS27	24.3386	24.5908	23.8489	23.8317	23.8143	23.1623	23.5107	23.4457	318	2	2	2	14.3	14.3	14.3	9.461	0	35.445	127440000	31	31860000	3870200	3749300	4468100	3881600	3866300	3541600	2817100	5665400
	2.127	0.663239	P12236	P12236	ADP/ATP translocase 3;ADP/ATP translocase 3, N-terminally processed	SLC25A6	24.86	24.7956	24.6254	24.4813	24.1096	24.101	24.2846	23.6141	191	10	3	2	32.6	11.1	7.4	32.866	0	27.461	180920000	24	9046100	1291500	925940	1086900	1417400	1001900	1078400	946150	1297900
	2.30597	0.661774	Q9H3N1	Q9H3N1	Thioredoxin-related transmembrane protein 1	TMX1	21.6094	21.9224	22.1916	22.0463	21.1398	21.2337	21.206	21.5431	706	4	4	4	13.9	13.9	13.9	31.791	0	24.09	28518000	14	2592600	235330	238250	505400	447310	214300	357270	193880	400850
	3.5929	0.657618	Q9H9B4	Q9H9B4	Sideroflexin-1	SFXN1	23.3484	23.3174	23.2657	23.1849	22.7149	22.6757	22.706	22.3893	710	5	5	5	17.7	17.7	17.7	35.619	0	95.712	68004000	19	4250200	548090	472740	846850	678750	469090	317820	300820	616070
	1.239	0.65521	P61353	P61353	60S ribosomal protein L27	RPL27	22.4988	22.3479	21.759	22.0408	21.452	20.9534	22.0558	21.5646	412	3	3	3	27.9	27.9	27.9	15.798	0	18.218	31768000	12	5294700	806160	540090	825540	754450	499750	537370	585430	745910
	0.696457	0.653098	P22059	P22059	Oxysterol-binding protein 1	OSBP	21.5758	21.9592	23.2224	23.0427	21.4104	22.1084	21.4591	22.2098	235	8	8	8	13.9	13.9	13.9	89.42	0	51.493	47879000	16	1167800	48422	56010	231220	261420	68494	166850	87970	247400
	2.23251	0.640481	P61619;Q9H9S3	P61619	Protein transport protein Sec61 subunit alpha isoform 1	SEC61A1	23.6563	23.863	23.5821	23.2717	23.0702	22.8008	23.1502	22.79	415	5	5	5	9.7	9.7	9.7	52.264	0	32.051	85798000	40	5362400	637680	609070	995110	768060	570890	420760	494940	865880
	2.04434	0.636865	O15173	O15173	Membrane-associated progesterone receptor component 2	PGRMC2	24.1333	24.0448	23.6277	23.8751	23.1815	23.1532	23.6595	23.1391	45	4	4	4	23.8	23.8	23.8	23.818	0	64.865	110740000	44	12304000	1423300	1139900	1836300	2061200	1082800	1549600	1217400	1993800
	1.77818	0.635211	P25705	P25705	ATP synthase subunit alpha, mitochondrial	ATP5A1	25.126	24.8352	24.5295	24.5005	24.2252	23.9855	24.4022	23.8373	250	11	11	11	24.6	24.6	24.6	59.75	0	142.05	193850000	76	6253100	924400	569280	962020	864750	727490	710600	592010	902570
	2.95359	0.627896	P30536	P30536	Translocator protein	TSPO	22.9457	23.0893	23.079	22.9183	22.4649	22.3828	22.5647	22.1082	274	2	2	2	9.5	9.5	9.5	18.828	0	12.208	58132000	16	8304600	914800	832910	1505900	1292200	783640	1046700	753750	1174600
	2.87875	0.616326	P00533;P04626;Q15303	P00533	Epidermal growth factor receptor	EGFR	22.1693	22.3439	22.3311	22.6097	21.6701	21.867	21.8305	21.621	115	8	8	8	8.3	8.3	8.3	134.28	0	50.444	38827000	18	647110	67523	57079	160430	84652	44957	86384	38313	107780
	0.747467	0.604608	P61106	P61106	Ras-related protein Rab-14	RAB14	23.0664	23.5922	24.5068	24.5729	22.9125	23.5701	23.2764	23.5609	404	9	9	9	59.1	59.1	59.1	23.897	0	98.067	129730000	40	8108300	401310	488410	1726900	2256100	291130	968190	532390	1443800
	1.55341	0.594193	P11166	P11166	Solute carrier family 2, facilitated glucose transporter member 1	SLC2A1	22.2599	21.8929	21.8993	21.4461	21.0664	21.299	21.6144	21.1416	181	3	3	3	6.7	6.7	6.7	54.083	0	20.005	28042000	24	2157100	235980	143160	290790	206430	334330	513230	170320	262860
	1.42247	0.594022	P80723	P80723	Brain acid soluble protein 1	BASP1	24.9055	24.9184	25.4667	25.7142	24.4743	24.7836	24.5138	24.857	471	10	10	10	59.5	59.5	59.5	22.693	0	130.69	298210000	65	22939000	2017300	1775900	4422700	5049400	1590200	2724700	1639200	3719800
	0.984962	0.591394	P63092;Q5JWF2	P63092;Q5JWF2	Guanine nucleotide-binding protein G(s) subunit alpha isoforms short;Guanine nucleotide-binding protein G(s) subunit alpha isoforms XLas	GNAS	23.4514	23.7893	24.3269	24.6595	23.2003	23.6944	23.2161	23.7506	455	6	6	5	15.7	15.7	12.9	45.664	0	73.605	142670000	37	7133400	517420	392060	1419400	1457200	446490	1009300	491450	1400100
	1.32072	0.582496	P51148	P51148	Ras-related protein Rab-5C	RAB5C	23.4929	23.9554	24.3292	24.3861	23.1237	23.6044	23.5334	23.5721	357	6	6	3	35.6	35.6	20.8	23.482	0	103.45	132730000	45	12066000	814260	758370	2591700	2551200	723120	1527800	906560	2193100
	0.987535	0.580408	P18124	P18124	60S ribosomal protein L7	RPL7	24.5991	24.3943	23.7575	23.9787	23.4358	23.0794	24.1865	23.7062	220	6	6	6	24.6	24.6	24.6	29.225	0	66.335	134540000	23	11212000	1588800	1256200	1432600	1643700	722740	1166500	1331400	2069600
	3.82273	0.576506	Q9NVI7	Q9NVI7	ATPase family AAA domain-containing protein 3A	ATAD3A	24.3663	24.1608	24.3369	24.1697	23.6385	23.6495	23.8062	23.6334	727	11	11	2	18.3	18.3	4.6	71.368	0	111.94	149550000	55	4398600	518520	335980	694810	745140	350480	533370	398340	821930
	1.07253	0.564303	P36578	P36578	60S ribosomal protein L4	RPL4	25.4921	25.7267	24.7582	25.0119	24.5946	24.414	25.1522	24.571	303	8	8	8	23.9	23.9	23.9	47.697	0	61.943	295980000	56	18499000	2339900	2396300	2828800	3061100	1637700	1888300	1880300	2466400
	1.79568	0.561315	Q3ZCQ8	Q3ZCQ8	Mitochondrial import inner membrane translocase subunit TIM50	TIMM50	22.3672	22.2646	22.3936	22.2086	21.7065	21.9097	22.0638	21.3089	581	3	3	3	10.8	10.8	10.8	39.646	0	37.63	37068000	12	2647700	315470	224610	426210	350250	255410	389070	277420	409260
	3.47032	0.558749	Q9NZ01	Q9NZ01	Very-long-chain enoyl-CoA reductase	TECR	24.6812	24.5934	24.7049	24.5229	24.1556	23.9405	24.1973	23.974	732	7	7	7	22.1	22.1	22.1	36.034	0	92.249	184470000	69	14190000	1612300	1413200	2498100	2180000	1169500	1704200	1267500	2345100
	2.77792	0.552855	Q9UJS0;O75746	Q9UJS0	Calcium-binding mitochondrial carrier protein Aralar2	SLC25A13	22.8025	22.8902	22.6326	22.6038	22.095	22.1762	22.3944	22.0521	751	7	7	7	10.7	10.7	10.7	74.175	0	51.721	50273000	18	1478600	135240	129530	277260	200590	175900	189470	131410	239230
	1.13433	0.549968	P05023;P13637;P50993;P20648;Q13733;P54707	P05023	Sodium/potassium-transporting ATPase subunit alpha-1	ATP1A1	24.9385	25.3714	25.7771	25.9839	24.7148	25.0763	24.8891	25.1907	130	19	19	19	22.7	22.7	22.7	112.89	0	323.31	376480000	106	8366300	545810	562460	1559400	1745900	587720	1200100	541830	1623100
	2.95632	0.54816	P04844	P04844	Dolichyl-diphosphooligosaccharide--protein glycosyltransferase subunit 2	RPN2	23.5518	23.5925	23.2995	23.2273	22.8476	22.8211	22.9316	22.8781	127	9	9	9	22.3	22.3	22.3	69.283	0	71.191	80633000	30	3505800	464730	260990	550540	411040	369260	490930	341140	617130
	1.5951	0.535801	P00403	P00403	Cytochrome c oxidase subunit 2	MT-CO2	21.6748	21.6097	22.1517	22.0019	20.9643	21.331	21.4805	21.5191	113	2	2	2	7.5	7.5	7.5	25.565	0	12.288	28738000	12	3592300	337600	253200	715050	577870	238230	479710	312760	677870
	1.83065	0.535656	P01891;P30457;P30453;P16190;P30450;P18462;P30459;P16189;P30512;P30456;P10314	P01891;P30457;P30453;P16190;P30450;P18462;P30459;P16189;P30512;P30456;P10314	HLA class I histocompatibility antigen, A-68 alpha chain;HLA class I histocompatibility antigen, A-66 alpha chain;HLA class I histocompatibility antigen, A-34 alpha chain;HLA class I histocompatibility antigen, A-33 alpha chain;HLA class I histocompatibility antigen, A-26 alpha chain;HLA class I histocompatibility antigen, A-25 alpha chain;HLA class I histocompatibility antigen, A-74 alpha chain;…	HLA-A	24.3627	24.5463	24.8632	24.872	23.8748	24.2282	24.0794	24.3191	118	8	8	2	25.2	25.2	6.6	40.908	0	242.5	201130000	51	10056000	851760	738090	1961600	1846100	658030	1290300	765160	1945300
	2.1986	0.532991	Q9UBM7	Q9UBM7	7-dehydrocholesterol reductase	DHCR7	22.6815	22.8693	22.5306	22.9024	22.2348	22.1276	22.471	22.0184	742	6	6	6	14.3	14.3	14.3	54.489	0	34.879	53238000	32	4436500	306110	255500	631720	597180	515560	705240	579490	845700
	0.393306	0.531333	Q9UI12	Q9UI12	V-type proton ATPase subunit H	ATP6V1H	18.9627	20.4626	21.8155	20.4259	19.5943	19.9451	19.8937	20.1084	749	3	3	3	10.6	10.6	10.6	55.882	0	20.98	11438000	4	457530	0	38226	144750	100880	0	58889	22433	92349
	0.616287	0.52951	O00592	O00592	Podocalyxin	PODXL	22.5588	22.8218	23.8836	23.9185	22.4055	23.149	22.4243	23.0859	31	5	5	5	12	12	12	58.635	0	39.032	87443000	25	3801900	217950	206540	760290	831980	254260	562360	247490	721000
	1.85877	0.529189	Q02809	Q02809	Procollagen-lysine,2-oxoglutarate 5-dioxygenase 1	PLOD1	22.895	22.7038	22.4328	22.5186	22.3927	21.9567	22.1921	21.892	489	5	5	5	10.2	10.2	10.2	83.549	0	32.669	47123000	10	1071000	135190	75173	160050	153780	139640	118670	110660	177800
	5.04339	0.519898	A0FGR8	A0FGR8	Extended synaptotagmin-2	ESYT2	22.9462	22.951	22.9448	23.0025	22.4518	22.4217	22.3614	22.53	0	8	8	8	10.9	10.9	10.9	102.36	0	62.737	61172000	23	1329800	134250	83362	231530	233040	114700	183160	108890	240890
	1.83181	0.511929	P61019;Q8WUD1	P61019;Q8WUD1	Ras-related protein Rab-2A;Ras-related protein Rab-2B	RAB2A;RAB2B	22.205	22.6049	22.6504	22.8339	21.8459	22.108	22.1277	22.1647	401	5	5	5	31.6	31.6	31.6	23.545	0	52.132	46908000	29	3350600	286680	216140	607410	636070	288170	496710	320410	498970
	1.03049	0.508924	P83731	P83731	60S ribosomal protein L24	RPL24	24.4389	24.0221	23.7173	23.5787	23.2785	23.2504	23.9394	23.2529	473	3	3	3	19.1	19.1	19.1	17.779	0	21.476	120510000	28	15064000	2368500	1211600	2476200	1784600	1470400	1772400	2038100	1942500
	2.11651	0.502825	P28288	P28288	ATP-binding cassette sub-family D member 3	ABCD3	22.6486	22.8667	22.5236	22.6179	22.3372	21.8832	22.3101	22.1151	265	6	6	6	12.3	12.3	12.3	75.475	0	47.905	47403000	24	1185100	104200	123710	170890	216360	147800	113030	124530	184580
	2.03274	0.49535	P11021	P11021	78 kDa glucose-regulated protein	HSPA5	26.4033	26.1659	25.9099	26.0924	25.6196	25.6133	25.876	25.4812	178	17	16	16	34.9	32.4	32.4	72.332	0	259.84	543550000	167	18118000	2322800	1627800	2496900	2687900	1789300	2487700	1824400	2881400
	0.293162	0.494534	Q9UJZ1	Q9UJZ1	Stomatin-like protein 2, mitochondrial	STOML2	20.9115	19.0879	20.5558	20.6356	18.1457	20.4459	20.6736	19.9476	752	3	3	3	11.2	11.2	11.2	38.534	0	17.951	12722000	7	706800	87167	55188	100050	103560	63896	105170	82270	109490
	1.16047	0.494214	P62424	P62424	60S ribosomal protein L7a	RPL7A	23.8969	23.9068	23.379	23.6157	23.0645	22.8232	23.6966	23.2374	432	6	6	6	24.4	24.4	24.4	29.995	0	46.116	100050000	30	10005000	1165100	900170	1105600	1337100	958660	1233500	1320400	1984000
	0.853998	0.488976	P53985	P53985	Monocarboxylate transporter 1	SLC16A1	22.8538	21.8907	21.8597	21.6783	21.7525	21.4144	21.793	21.3665	378	2	2	2	5.8	5.8	5.8	53.944	0	24.262	31983000	7	2284500	339910	196720	380910	277920	266410	251450	252610	318580
	0.718933	0.488664	O14828	O14828	Secretory carrier-associated membrane protein 3	SCAMP3	22.263	22.663	23.2644	23.4785	21.9094	22.4861	22.5822	22.7366	37	6	6	6	30	30	30	38.287	0	76.5	65410000	24	6541000	150210	349070	1097200	1745900	354550	777720	751950	1314400
	0.886278	0.485871	P49207	P49207	60S ribosomal protein L34	RPL34	23.3117	23.2386	22.5665	22.8917	22.4414	22.1401	23.1405	22.343	343	3	3	3	20.5	20.5	20.5	13.293	0	17.365	60280000	19	10047000	1244100	1068200	1352600	1477800	923450	1084600	1353600	1542400
	2.25548	0.47944	Q96CS3	Q96CS3	FAS-associated factor 2	FAF2	22.6912	22.7717	22.5812	22.7877	22.1437	21.9973	22.48	22.293	671	5	5	5	14.4	14.4	14.4	52.623	0	51.052	50189000	22	2182100	256690	196740	331410	366850	152060	258670	216120	403600
	2.03206	0.467867	P46977	P46977	Dolichyl-diphosphooligosaccharide--protein glycosyltransferase subunit STT3A	STT3A	21.2471	21.2282	21.0878	20.9128	20.5206	20.6053	20.9372	20.5415	337	4	3	3	5	4	4	80.529	0	17.766	16870000	11	581730	65682	48065	100710	76585	48021	77881	61119	103660
	1.13088	0.45144	P05783;CON__H-INV:HIT000015463	P05783	Keratin, type I cytoskeletal 18	KRT18	28.0821	27.8847	27.7275	27.3741	27.7347	27.1006	27.2911	27.1362	140	21	21	16	66.5	66.5	55.3	48.057	0	323.31	1677400000	214	64515000	8522000	5673300	9006600	7650800	10148000	7325200	5328300	10861000
	0.679602	0.448517	Q14204	Q14204	Cytoplasmic dynein 1 heavy chain 1	DYNC1H1	23.7588	24.2781	24.9957	25.0781	23.9009	24.1325	24.1109	24.1723	536	38	38	38	9.3	9.3	9.3	532.4	0	260.52	203290000	71	791020	29644	37734	191410	181360	51405	103000	55153	141310
	0.189918	0.443147	P18077	P18077	60S ribosomal protein L35a	RPL35A	21.5221	21.4452	20.9971	20.2923	22.0805	21.1592	18.0886	21.1559	218	2	2	2	12.7	12.7	12.7	12.538	0.0015244	11.203	21278000	7	3039800	354160	325490	351090	156400	525230	449730	231120	646560
	3.09546	0.438379	P27105	P27105	Erythrocyte band 7 integral membrane protein	STOM	23.7101	23.5491	23.4505	23.4809	22.9922	23.1263	23.1443	23.1743	257	6	6	6	24.7	24.7	24.7	31.73	0	59.912	94323000	33	6288200	763590	364340	1092700	979150	367650	939270	570280	1211200
	0.795234	0.436949	O15027	O15027	Protein transport protein Sec16A	SEC16A	19.136	19.0196	19.2913	20.1936	18.8839	19.0717	19.0664	18.8708	43	3	3	3	1.2	1.2	1.2	251.89	0	16.562	5674800	3	65986	4750.5	3256.4	9551.6	11564	6230.4	10819	7073.9	12740
	0.845577	0.430951	Q07020	Q07020	60S ribosomal protein L18	RPL18	24.6913	24.6302	23.9282	24.1959	23.7508	23.6642	24.4575	23.8493	499	5	5	5	28.7	28.7	28.7	21.634	0	68.013	160010000	33	22859000	2896500	2145200	2962800	2836300	2000000	2707000	3066700	4244300
	0.484874	0.426406	Q96RQ3	Q96RQ3	Methylcrotonoyl-CoA carboxylase subunit alpha, mitochondrial	MCCC1	28.4888	28.1085	27.4911	27.002	27.8583	26.9135	27.5968	27.0162	679	19	19	19	35.3	35.3	35.3	80.472	0	323.31	1775800000	363	53812000	8753200	5412900	7241700	4609500	7345500	5844600	6110100	8494700
	0.609277	0.426302	Q99880;Q99879;Q99877;Q93079;Q5QNW6;P62807;P58876;P57053;O60814;Q16778;P33778;P23527;P06899;Q8N257;Q96A08	Q99880;Q99879;Q99877;Q93079;Q5QNW6;P62807;P58876;P57053;O60814;Q16778;P33778;P23527;P06899;Q8N257;Q96A08	Histone H2B type 1-L;Histone H2B type 1-M;Histone H2B type 1-N;Histone H2B type 1-H;Histone H2B type 2-F;Histone H2B type 1-C/E/F/G/I;Histone H2B type 1-D;Histone H2B type F-S;Histone H2B type 1-K;Histone H2B type 2-E;Histone H2B type 1-B;Histone H2B type 1-O;Histone H2B type 1-J;Histone H2B type 3-B;Histone H2B type 1-A	HIST1H2BL;HIST1H2BM;HIST1H2BN;HIST1H2BH;HIST2H2BF;HIST1H2BC;HIST1H2BD;H2BFS;HIST1H2BK;HIST2H2BE;HIST1H2BB;HIST1H2BO;HIST1H2BJ;HIST3H2BB;HIST1H2BA	24.2321	24.1993	24.2726	24.1754	24.6931	23.1981	23.4139	23.8691	76	5	5	5	40.5	40.5	40.5	13.952	0	61.903	155180000	57	22169000	2586500	1703900	3587500	3720700	3066200	2248800	1464800	3790400
	0.365817	0.424752	P62191	P62191	26S protease regulatory subunit 4	PSMC1	20.7306	20.7287	20.9503	20.6601	20.8296	18.8465	20.8783	20.8164	420	3	3	3	9.5	9.5	9.5	49.184	0	19.963	15786000	9	631460	34243	54997	145200	55582	52400	55222	49989	183830
	0.588072	0.423536	P31327	P31327	Carbamoyl-phosphate synthase [ammonia], mitochondrial	CPS1	25.2785	24.7656	24.3199	24.3312	24.8916	23.8787	24.4133	23.8175	276	22	22	22	17.1	17.1	17.1	164.94	0	139.02	199710000	66	2593600	386610	203020	305200	269360	453150	333700	271480	371080
	1.41032	0.422874	P46781	P46781	40S ribosomal protein S9	RPS9	26.1873	26.4574	25.9887	25.8328	25.6164	25.5296	25.9355	25.6932	333	9	9	9	37.6	37.6	37.6	22.591	0	108.35	553490000	109	50317000	4817100	4391300	7457700	6924000	5762200	6922200	4499100	9543300
	2.1795	0.419705	Q8TED1	Q8TED1	Probable glutathione peroxidase 8	GPX8	21.4302	21.7686	21.7607	21.4534	21.0573	21.2228	21.2597	21.1944	639	3	3	3	15.8	15.8	15.8	23.881	0	18.013	24414000	10	2034500	218900	180520	495540	239200	120340	337790	149140	293060
	0.670955	0.41577	P62753	P62753	40S ribosomal protein S6	RPS6	23.4665	23.2794	22.5636	22.6372	22.9355	22.0393	22.5447	22.764	438	3	3	3	14.1	14.1	14.1	28.68	0	22.608	64356000	17	8044500	1018000	833530	1026500	917190	970600	878720	655250	1744600
	0.515256	0.410102	Q9Y6C9	Q9Y6C9	Mitochondrial carrier homolog 2	MTCH2	23.7412	24.1319	24.9059	25.1341	23.669	24.3841	23.9248	24.2947	786	7	7	7	23.8	23.8	23.8	33.331	0	71.687	198630000	65	14188000	580620	880670	2967200	3225600	950130	1662400	1042700	2878700
	0.963459	0.406923	P33527	P33527	Multidrug resistance-associated protein 1	ABCC1	21.6421	21.8586	22.044	22.3643	21.3255	21.9997	21.3814	21.5749	287	6	6	6	5.1	5.1	5.1	171.59	0	37.815	33066000	10	452960	35894	38840	71928	94988	6675.8	70036	36947	97648
	0.858846	0.396125	P10809	P10809	60 kDa heat shock protein, mitochondrial	HSPD1	24.4482	23.818	23.6022	23.5486	23.5846	23.5489	23.5572	23.1418	177	10	10	10	21.8	21.8	21.8	61.054	0	84.095	114100000	54	3565700	559820	267510	457820	324140	429100	621010	353410	552860
	0.500343	0.391137	P14625;Q58FF3	P14625	Endoplasmin	HSP90B1	19.11	20.3696	19.9701	20.5921	19.6143	19.8883	19.2159	19.7589	200	3	2	2	4.4	2.9	2.9	92.468	0	13.897	7348400	3	183710	6058.7	24973	29209	40754	5229.3	35130	4735.8	37620
	0.54687	0.390344	Q9NZM1	Q9NZM1	Myoferlin	MYOF	23.8841	24.6035	25.1229	25.1154	23.9357	24.4952	24.126	24.6077	734	29	29	29	17.6	17.6	17.6	234.71	0	230.93	231200000	89	1864500	77333	107540	390480	363250	113520	273130	135000	404260
	0.359026	0.385879	P38646	P38646	Stress-70 protein, mitochondrial	HSPA9	28.3719	27.9798	26.9978	27.1565	27.8383	26.6954	27.7764	26.6524	308	23	23	22	40.6	40.6	39.6	73.68	0	323.31	1626100000	363	42792000	7044600	4261600	4587000	5015600	6116600	4536100	5927800	5302900
	0.710574	0.385333	P62829	P62829	60S ribosomal protein L23	RPL23	25.6673	25.0274	24.5569	24.9346	24.9807	24.437	24.7579	24.4692	442	4	4	4	29.3	29.3	29.3	14.865	0	23.895	268210000	22	29801000	4749600	2738400	3455500	5504400	2989100	3224300	2634600	4505200
	1.08013	0.377318	Q02978	Q02978	Mitochondrial 2-oxoglutarate/malate carrier protein	SLC25A11	24.5249	24.5615	24.2246	23.9423	23.9826	23.7989	24.2255	23.7371	491	8	8	8	30.6	30.6	30.6	34.061	0	90.666	157330000	50	9254700	1174900	985350	1444500	968940	890060	1250400	949200	1591500
	0.784111	0.376812	O95486	O95486	Protein transport protein Sec24A	SEC24A	20.0292	19.7277	19.2624	20.2476	19.2228	19.5471	19.3093	19.6804	105	3	3	3	4.1	4.1	4.1	119.75	0	18.826	4502900	5	121700	2522.7	0	13048	4332.8	0	41953	10202	49641
	2.83632	0.376698	Q9Y277	Q9Y277	Voltage-dependent anion-selective channel protein 3	VDAC3	24.8587	24.9839	25.0166	24.9788	24.4082	24.6248	24.6531	24.645	769	6	6	6	29.7	29.7	29.7	30.658	0	112.56	253210000	57	18086000	1709600	1455800	2983900	2662800	1586000	2638700	1547400	3502000
	0.604057	0.374037	P20020;P23634;Q16720;Q01814	P20020;P23634	Plasma membrane calcium-transporting ATPase 1;Plasma membrane calcium-transporting ATPase 4	ATP2B1;ATP2B4	21.8767	22.4325	22.9466	22.7153	22.1928	22.5141	21.64	22.1281	223	6	6	6	8.8	8.8	8.8	134.68	0	61.398	48324000	15	966480	59514	84790	188420	194950	29369	158200	72325	178910
	0.413616	0.367956	P05166	P05166	Propionyl-CoA carboxylase beta chain, mitochondrial	PCCB	25.3115	24.7381	24.324	23.8192	24.4762	23.6373	24.6535	23.954	134	13	13	13	33	33	33	58.215	0	131.58	188420000	99	6280700	1000900	614730	745490	529410	775660	695370	821070	1098100
	0.974766	0.362207	P21796	P21796	Voltage-dependent anion-selective channel protein 1	VDAC1	23.212	22.8583	23.1162	23.0911	22.9604	23.0564	22.4204	22.3916	234	4	4	4	18	18	18	30.772	0	33.184	70860000	21	4168300	338630	282140	722370	619630	407210	734070	306250	757960
	2.36689	0.356727	P16615;O14983	P16615;O14983	Sarcoplasmic/endoplasmic reticulum calcium ATPase 2;Sarcoplasmic/endoplasmic reticulum calcium ATPase 1	ATP2A2;ATP2A1	23.4928	23.2989	23.3001	23.3677	22.857	23.0552	23.1638	22.9566	211	7	7	7	8.2	8.2	8.2	114.76	0	58.972	84517000	39	1837300	214620	120120	292970	285680	135500	260760	169260	358410
	1.63128	0.355307	P08195	P08195	4F2 cell-surface antigen heavy chain	SLC3A2	25.4108	25.3667	25.2281	25.2739	25.0083	24.8475	25.2529	24.7495	154	17	17	17	33.3	33.3	33.3	67.993	0	167.89	315770000	121	10889000	1127500	897750	1493100	1677700	1217400	1445200	1361000	1668900
	0.881832	0.352117	Q9UBX3	Q9UBX3	Mitochondrial dicarboxylate carrier	SLC25A10	21.9279	21.8617	21.6586	21.3832	21.4528	21.4937	21.593	20.8835	744	4	4	4	17.8	17.8	17.8	31.282	0	30.785	24774000	12	1651600	263450	200180	323920	273040	105930	153500	119550	212020
	0.950838	0.351394	P22695	P22695	Cytochrome b-c1 complex subunit 2, mitochondrial	UQCRC2	24.1767	23.6765	23.771	23.5248	23.492	23.3652	23.7483	23.1379	240	8	8	8	25.2	25.2	25.2	48.442	0	91.379	110970000	49	5840300	745480	460220	862930	679670	653290	776960	607040	1054700
	0.754394	0.348598	P54886	P54886	Delta-1-pyrroline-5-carboxylate synthase;Glutamate 5-kinase;Gamma-glutamyl phosphate reductase	ALDH18A1	23.0286	22.8197	22.2254	22.3509	22.5985	22.1165	22.2796	22.0357	381	8	8	8	10.8	10.8	10.8	87.301	0	63.443	49898000	41	1108900	175540	108650	167360	158870	138350	139280	94719	126080
	1.3296	0.341739	Q5VTE0;P68104;Q05639	Q5VTE0;P68104;Q05639	Putative elongation factor 1-alpha-like 3;Elongation factor 1-alpha 1;Elongation factor 1-alpha 2	EEF1A1P5;EEF1A1;EEF1A2	25.833	25.8242	25.4701	25.6058	25.5919	25.4297	25.215	25.1297	464	9	9	9	23.6	23.6	23.6	50.184	0	81.806	421350000	119	20064000	2276900	1558500	2596000	2681400	2594700	3273700	1693300	3389700
	1.28996	0.340076	P00387	P00387	NADH-cytochrome b5 reductase 3;NADH-cytochrome b5 reductase 3 membrane-bound form;NADH-cytochrome b5 reductase 3 soluble form	CYB5R3	23.204	23.3723	23.46	23.6538	22.8124	23.0243	23.2504	23.2427	112	5	5	5	16.9	16.9	16.9	34.234	0	35.302	90442000	21	6460100	535230	418910	1126900	1071600	532650	816670	619690	1338500
	1.1041	0.338514	P57088	P57088	Transmembrane protein 33	TMEM33	22.4649	22.3171	21.933	22.3215	22.2223	21.8705	21.9086	21.681	389	3	3	3	11.3	11.3	11.3	27.978	0	19.973	37606000	12	3418700	450500	301200	571270	550370	407270	316990	300190	520940
	0.30108	0.334181	Q99878;Q96KK5;Q9BTM1;Q16777;Q93077;Q7L7L0;Q6FI13;P20671;P0C0S8;P04908;Q71UI9;P0C0S5;Q96QV6;P16104;Q8IUE6	Q99878;Q96KK5;Q9BTM1;Q16777;Q93077;Q7L7L0;Q6FI13;P20671;P0C0S8;P04908;Q71UI9;P0C0S5;Q96QV6;P16104	Histone H2A type 1-J;Histone H2A type 1-H;Histone H2A.J;Histone H2A type 2-C;Histone H2A type 1-C;Histone H2A type 3;Histone H2A type 2-A;Histone H2A type 1-D;Histone H2A type 1;Histone H2A type 1-B/E;Histone H2A.V;Histone H2A.Z;Histone H2A type 1-A;Histone H2AX	HIST1H2AJ;HIST1H2AH;H2AFJ;HIST2H2AC;HIST1H2AC;HIST3H2A;HIST2H2AA3;HIST1H2AD;HIST1H2AG;HIST1H2AB;H2AFV;H2AFZ;HIST1H2AA;H2AFX	22.2846	22.3863	23.0212	23.2461	23.4809	21.8234	21.7566	22.5405	129	3	3	3	27.3	27.3	27.3	13.936	0	20.538	59413000	11	11883000	1037900	800060	1668200	2168800	1968200	1463900	675590	2100000
	0.567999	0.322798	P22087	P22087	rRNA 2-O-methyltransferase fibrillarin	FBL	23.3643	23.1262	22.9155	22.8518	23.0523	22.1432	23.1949	22.5762	236	4	4	4	13.1	13.1	13.1	33.784	0	45.97	64721000	18	3406300	452870	311790	553430	458230	411050	368820	499880	350280
	0.793036	0.322625	O60762	O60762	Dolichol-phosphate mannosyltransferase subunit 1	DPM1	23.0938	23.0701	22.8408	22.306	22.7059	22.3937	22.5831	22.3375	75	6	6	6	24.6	24.6	24.6	29.634	0	39.069	57556000	17	3597200	454880	357750	570860	317620	256780	538070	384520	716740
	0.366077	0.32225	Q8WUM4	Q8WUM4	Programmed cell death 6-interacting protein	PDCD6IP	21.3139	21.7375	22.3642	22.641	21.3728	22.0793	21.206	22.1095	644	7	7	7	9.8	9.8	9.8	96.022	0	57.54	38208000	15	796000	57825	27435	125740	162750	30874	158730	59792	172850
	0.957846	0.32219	P62834;P61224;A6NIZ1	P62834;P61224;A6NIZ1	Ras-related protein Rap-1A;Ras-related protein Rap-1b;Ras-related protein Rap-1b-like protein	RAP1A;RAP1B	21.749	21.8036	22.4603	22.0725	21.7526	21.7545	21.5302	21.7595	407	4	4	4	26.1	26.1	26.1	20.987	0	25.697	34836000	12	3483600	142890	272920	745350	768950	293440	429560	230390	600090
	1.14927	0.320978	P53618	P53618	Coatomer subunit beta	COPB1	23.4598	23.5203	23.5217	23.3363	22.8844	23.5218	22.9878	23.1601	375	11	11	11	12	12	12	107.14	0	76.962	92424000	30	1925500	180590	140410	305940	225070	173350	311480	193780	394880
	1.00744	0.317435	P62491;Q15907	P62491;Q15907	Ras-related protein Rab-11A;Ras-related protein Rab-11B	RAB11A;RAB11B	22.0422	22.1305	22.405	22.7348	22.0714	21.9286	22.1034	21.9393	433	6	6	6	28.7	28.7	28.7	24.393	0	36.495	43862000	11	3133000	124110	169940	682030	780120	253810	460670	205240	457080
	0.513763	0.317076	O95197	O95197	Reticulon-3	RTN3	22.9448	23.2448	24.0518	23.9885	23.3585	23.271	23.0316	23.3005	100	1	1	1	1.1	1.1	1.1	112.61	0.001462	8.3228	104270000	36	2266800	132070	133520	468030	416170	226710	310900	162820	416600
	0.917658	0.315875	P62266	P62266	40S ribosomal protein S23	RPS23	21.5555	21.8203	21.1189	21.4215	21.4073	20.9367	21.1711	21.1376	426	3	3	3	21	21	21	15.807	0	17.925	22796000	9	3799400	286700	430520	444440	360770	466560	528630	430380	851350
	0.458823	0.315095	P08754;P63096;P09471;P11488;P19087;A8MTJ3;P38405	P08754	Guanine nucleotide-binding protein G(k) subunit alpha	GNAI3	23.2887	23.8319	24.4486	24.3452	23.2909	23.8525	23.5272	23.9834	160	5	4	3	19.5	16.4	13	40.532	0	43.186	142180000	36	9478800	552150	599940	1808400	1769000	600140	1504300	681310	1963600
	0.869909	0.311974	P18085	P18085	ADP-ribosylation factor 4	ARF4	22.0639	21.9571	22.4406	22.4634	22.0195	22.194	21.5996	21.8641	219	5	5	2	37.2	37.2	9.4	20.511	0	35.967	40999000	15	3727200	264070	205730	402890	677580	426970	696010	301160	752790
	1.23902	0.311202	Q15084	Q15084	Protein disulfide-isomerase A6	PDIA6	20.9324	20.8408	20.6719	20.8981	20.8378	20.5787	20.3817	20.3002	557	3	3	3	9.8	9.8	9.8	48.121	0	29.634	14550000	11	855860	66681	77859	82918	149270	139910	135350	67492	136380
	1.62634	0.308818	Q9Y679	Q9Y679	Ancient ubiquitous protein 1	AUP1	21.7193	21.9557	21.8686	21.7342	21.5379	21.3708	21.7419	21.392	784	4	4	4	12.4	12.4	12.4	45.786	0	31.796	29322000	18	1466100	120410	117630	260790	193490	148140	192790	149390	283490
	0.814361	0.306353	P05387	P05387	60S acidic ribosomal protein P2	RPLP2	22.9472	22.802	22.7292	22.6703	22.5326	22.9615	22.2557	22.1736	137	4	4	4	45.2	45.2	45.2	11.665	0	49.604	52552000	29	10510000	1627500	1246000	2202700	2087800	591340	960130	834630	960430
	0.207727	0.30159	Q15599	Q15599	Na(+)/H(+) exchange regulatory cofactor NHE-RF2	SLC9A3R2	18.9027	20.6233	21.2775	21.3907	20.1331	20.2545	20.3981	20.2022	568	4	4	4	14.2	14.2	14.2	37.413	0	26.336	13458000	7	708310	0	61839	117330	169120	54480	101660	75914	127970
	0.415264	0.29596	P62241	P62241	40S ribosomal protein S8	RPS8	21.8552	21.4219	20.414	21.1193	21.1671	20.7973	20.8399	20.8222	421	3	3	3	16.8	16.8	16.8	24.205	0	28.612	18669000	13	2074400	337580	223350	202420	198610	210680	305830	195280	400630
	1.1423	0.287614	Q14739	Q14739	Lamin-B receptor	LBR	20.8308	21.0662	21.0435	21.0446	20.3556	20.7991	20.7914	20.8886	547	2	2	2	3.1	3.1	3.1	70.702	0.0016103	11.542	17043000	10	811580	66392	63639	127400	121230	64232	119400	72839	176450
	0.893631	0.287614	P62244	P62244	40S ribosomal protein S15a	RPS15A	24.886	24.9221	24.556	24.5659	24.681	24.1709	24.6484	24.2792	422	3	3	3	24.6	24.6	24.6	14.839	0	159.34	241580000	62	30197000	3001100	2714700	4140000	3792400	3439700	4409400	2781900	5918100
	0.761359	0.285797	P45880	P45880	Voltage-dependent anion-selective channel protein 2	VDAC2	24.6004	24.5934	25.0936	25.1468	24.3468	24.7699	24.4374	24.737	327	7	7	7	27.9	27.9	27.9	31.566	0	157.47	252740000	87	15796000	1195500	963490	2767400	2773700	1325200	2528400	1295400	2947100
	0.95532	0.279965	O00148;Q13838	O00148;Q13838	ATP-dependent RNA helicase DDX39A;Spliceosome RNA helicase DDX39B	DDX39A;DDX39B	24.7126	24.5453	24.1615	24.1147	24.1734	24.0423	24.1472	24.0513	25	7	7	7	17.8	17.8	17.8	49.129	0	67.898	169010000	52	8895300	1256800	878820	1240700	954180	1084700	1146700	740490	1592900
	0.453072	0.276505	Q6DD88	Q6DD88	Atlastin-3	ATL3	22.0503	22.2796	22.938	22.8752	22.0069	22.6043	21.9508	22.4751	592	8	8	8	21.6	21.6	21.6	60.541	0	51.037	55360000	21	2129200	70184	98476	299510	267230	191860	441530	189990	570430
	0.626473	0.275435	Q9BWM7	Q9BWM7	Sideroflexin-3	SFXN3	23.5999	23.118	22.8677	22.7463	22.8497	22.6621	23.0457	22.6727	697	9	9	9	35.5	35.5	35.5	35.503	0	65.552	73936000	28	3696800	491440	314050	469620	447600	365040	412250	437630	759170
	0.710181	0.267115	Q8N5K1	Q8N5K1	CDGSH iron-sulfur domain-containing protein 2	CISD2	21.4926	21.1319	21.6159	21.6094	20.7947	21.2375	21.2732	21.4759	630	3	3	3	25.9	25.9	25.9	15.278	0	18.502	24407000	7	2711900	212760	152680	465250	440910	179600	410070	257280	593310
	1.35645	0.266885	Q8N1F7	Q8N1F7	Nuclear pore complex protein Nup93	NUP93	21.0098	21.1096	21.2418	21.0469	20.9619	20.7532	21.0096	20.616	628	4	4	4	6.1	6.1	6.1	93.487	0	26.478	18444000	8	361640	32986	16202	63768	47709	39493	51048	42335	68099
	0.864737	0.258402	Q9H1K4;Q9H936	Q9H1K4;Q9H936	Mitochondrial glutamate carrier 2;Mitochondrial glutamate carrier 1	SLC25A18;SLC25A22	20.6191	20.8197	20.7596	20.6185	20.6504	20.5333	20.572	20.0276	702	3	3	3	7.6	7.6	7.6	33.848	0	17.722	13342000	8	667120	78393	63511	128110	107600	63822	83954	49634	92094
	0.601509	0.258133	P36542	P36542	ATP synthase subunit gamma, mitochondrial	ATP5C1	22.8368	22.7968	22.4648	22.149	22.4039	22.2647	22.5645	21.9817	302	5	5	5	17.1	17.1	17.1	32.996	0	30.691	52696000	13	4053500	314980	213210	828860	791240	287180	521650	279880	816530
	0.174679	0.255221	P11586	P11586	C-1-tetrahydrofolate synthase, cytoplasmic;Methylenetetrahydrofolate dehydrogenase;Methenyltetrahydrofolate cyclohydrolase;Formyltetrahydrofolate synthetase;C-1-tetrahydrofolate synthase, cytoplasmic, N-terminally processed	MTHFD1	19.2381	20.1694	20.4643	20.9517	18.9115	20.761	19.5432	20.5869	188	5	5	5	7	7	7	101.56	0	29.37	12785000	6	245860	2696.8	5438.9	24410	49114	10031	65139	19988	69039
	2.47856	0.252125	P05388;Q8NHW5	P05388;Q8NHW5	60S acidic ribosomal protein P0;60S acidic ribosomal protein P0-like	RPLP0;RPLP0P6	22.4562	22.4109	22.3407	22.4754	22.0965	22.2385	22.2525	22.0871	138	5	5	5	23.3	23.3	23.3	34.273	0	32.528	44845000	12	3449600	373010	284840	391580	567950	264310	558460	335360	674110
	0.122635	0.24777	O75131;Q96FN4;Q8IYJ1;Q96A23;O95741;Q86YQ8;Q9HCH3;Q9UBL6	O75131	Copine-3	CPNE3	18.4737	20.5163	20.6395	21.1421	18.9907	20.9292	19.2967	20.5641	82	3	3	3	4.8	4.8	4.8	60.13	0	17.518	11981000	6	499230	0	35735	83461	120330	18702	143100	18853	79044
	0.61484	0.241103	Q15293	Q15293	Reticulocalbin-1	RCN1	21.6723	21.882	21.7823	21.8916	21.6316	21.7736	21.8161	21.0424	562	4	4	4	15.4	15.4	15.4	38.89	0	30.33	28903000	11	1926900	188850	170640	301730	328880	199770	289820	190990	256180
	0.601336	0.240178	P15880	P15880	40S ribosomal protein S2	RPS2	26.4944	26.5536	26.1419	25.7643	26.0982	25.8643	26.0271	26.004	206	9	9	9	34.1	34.1	34.1	31.324	0	127.72	621700000	118	34539000	4199200	3611700	4452500	4228000	3734300	4091700	3321700	6899600
	0.515506	0.23891	P43007	P43007	Neutral amino acid transporter A	SLC1A4	21.1176	21.6698	21.9548	21.4976	20.9577	21.473	21.4232	21.4303	321	3	3	3	9.6	9.6	9.6	55.722	0	24.862	26196000	13	1309800	50829	114670	222220	211330	94094	210620	130650	275380
	0.370983	0.233893	P23396	P23396	40S ribosomal protein S3	RPS3	27.0451	26.9357	26.3736	25.9968	26.402	26.0091	26.5675	26.437	243	12	12	12	55.6	55.6	55.6	26.688	0	300.3	814820000	150	42886000	5368600	4625000	5923400	4280000	4546500	4635900	4403400	9102700
	0.501919	0.228959	P62263	P62263	40S ribosomal protein S14	RPS14	23.919	24.0464	23.3919	23.2406	23.594	23.3961	23.4396	23.2524	425	4	4	4	34.4	34.4	34.4	16.273	0	63.05	114230000	37	28558000	3393500	3336700	3276900	2823600	4139000	3920800	2617100	5050900
	0.170146	0.223186	P84098	P84098	60S ribosomal protein L19	RPL19	23.9116	23.6595	21.8072	22.4491	22.5812	22.6056	23.0048	22.743	476	2	2	2	13.3	13.3	13.3	23.466	0	48.375	66922000	23	11154000	1958000	1321500	733850	1153600	1047700	1509600	1230100	2199300
	1.15415	0.223063	P62987;P62979;P0CG47;P0CG48	P62987;P62979;P0CG47;P0CG48	Ubiquitin-60S ribosomal protein L40;Ubiquitin;60S ribosomal protein L40;Ubiquitin-40S ribosomal protein S27a;Ubiquitin;40S ribosomal protein S27a;Polyubiquitin-B;Ubiquitin;Polyubiquitin-C;Ubiquitin	UBA52;RPS27A;UBB;UBC	25.6097	25.8864	25.8269	25.6746	25.4578	25.3891	25.7492	25.5093	167	3	3	3	26.6	26.6	26.6	14.728	0	170.01	457970000	64	76329000	5989300	6309700	12059000	9970200	8520200	10553000	8131100	14796000
	0.241107	0.220996	P81605	P81605	Dermcidin;Survival-promoting peptide;DCD-1	DCD	22.046	21.4717	20.9267	21.4955	22.0022	20.6491	21.4277	20.9769	472	2	2	2	20	20	20	11.284	0.0016026	11.48	23994000	4	4798800	547250	317790	304390	642120	1207000	446530	477330	856330
	0.755848	0.219872	P14868	P14868	Aspartate--tRNA ligase, cytoplasmic	DARS	22.1374	22.1779	21.9552	21.9483	21.9077	21.5493	22.157	21.7253	202	7	7	7	15.6	15.6	15.6	57.136	0	42.802	33497000	20	905320	105650	90450	99709	76341	87256	123740	160090	162080
	0.869614	0.218452	P49792;Q99666;O14715;P0DJD0;P0DJD1	P49792	E3 SUMO-protein ligase RanBP2	RANBP2	22.7933	23.1066	23.3769	23.0631	22.8685	22.7514	22.948	22.8981	348	9	9	5	3.3	3.3	1.9	358.2	0	78.107	73553000	36	391240	23150	32577	66130	60190	41974	54314	37025	75881
	0.684932	0.213362	Q92626	Q92626	Peroxidasin homolog	PXDN	21.9258	21.7851	21.379	21.3497	21.479	21.4028	21.4238	21.2807	653	5	5	5	4.3	4.3	4.3	165.27	0	35.968	24623000	8	337300	44844	31205	42398	42322	47936	51660	34813	42118
	0.162002	0.21224	O43760	O43760	Synaptogyrin-2	SYNGR2	21.725	22.318	23.541	23.309	21.8198	22.9196	22.338	22.9665	63	3	3	3	12.5	12.5	12.5	24.81	0	22.988	67615000	28	9659200	262780	564980	2212400	1768000	403410	1559800	704040	2183800
	2.51403	0.176456	Q71UM5	Q71UM5	40S ribosomal protein S27-like	RPS27L	22.6131	22.5989	22.6198	22.6449	22.4027	22.4084	22.5495	22.4102	605	1	1	1	13.1	13.1	13.1	9.4771	0.0014514	7.692	53148000	10	13287000	1211400	948940	1974500	1926100	1416500	2074000	1325500	2409900
	0.274364	0.172904	P27824	P27824	Calnexin	CANX	25.625	25.8539	26.3535	26.5518	25.6078	26.1531	25.7374	26.1943	264	15	15	15	29.1	29.1	29.1	67.567	0	273.37	643170000	189	20099000	1322000	1157100	3276000	3263100	1677200	3355500	1603900	4444300
	0.479516	0.171193	Q14247	Q14247	Src substrate cortactin	CTTN	22.1485	22.4578	22.0621	21.8792	22.2009	21.8897	22.0683	21.704	537	5	5	5	11.6	11.6	11.6	61.585	0	32.741	40530000	14	1501100	47551	85311	119230	168810	235840	288580	198440	357330
	0.234671	0.163928	P43304	P43304	Glycerol-3-phosphate dehydrogenase, mitochondrial	GPD2	23.5177	23.5833	24.4422	24.5619	23.7643	23.9858	23.7598	23.9395	325	14	14	14	25	25	25	80.852	0	136.31	157280000	62	3657700	178210	164630	598550	673550	294830	600470	307100	840400
	0.0848759	0.161077	P33897	P33897	ATP-binding cassette sub-family D member 1	ABCD1	18.3224	20.5232	20.9557	20.7916	19.0687	20.3324	20.2789	20.2685	288	3	3	3	4.8	4.8	4.8	82.936	0	20.357	11236000	6	303670	13889	32355	69045	66442	10129	41296	23468	47045
	0.234516	0.151295	Q7Z3C6	Q7Z3C6	Autophagy-related protein 9A	ATG9A	19.0065	18.9258	19.2911	20.0501	19.0663	19.1244	19.1858	19.2917	612	2	2	2	2.5	2.5	2.5	94.446	0.0015873	11.453	5437300	2	139420	6905.8	0	23118	28866	13086	21140	13538	32764
	0.23894	0.148018	P30050	P30050	60S ribosomal protein L12	RPL12	22.4191	22.5247	21.9305	22.4509	21.857	21.8563	22.7433	22.2765	270	3	3	3	24.2	24.2	24.2	17.818	0	39.146	46791000	19	5199000	382470	335880	346800	491530	528150	832940	763210	1518100
	0.201323	0.144936	P62280	P62280	40S ribosomal protein S11	RPS11	25.9874	25.8535	24.9993	25.1796	25.5496	25.0354	25.6591	25.1958	430	9	9	9	36.1	36.1	36.1	18.431	0	58.698	399620000	118	39962000	4553500	3122200	5767300	4188700	4764400	4202800	5128800	8234600
	0.625859	0.143845	P60866	P60866	40S ribosomal protein S20	RPS20	21.4101	21.16	21.2441	21.2565	21.3569	20.8856	21.1319	21.1209	395	1	1	1	10.1	10.1	10.1	13.373	0.0013736	6.8328	21112000	11	4222300	411790	308860	631350	557860	512990	545860	388670	864950
	0.480145	0.14206	Q14258	Q14258	E3 ubiquitin/ISG15 ligase TRIM25	TRIM25	20.2045	20.6746	20.6439	20.4321	20.5313	20.1589	20.3002	20.3966	539	2	2	2	3.8	3.8	3.8	70.973	0	13.247	12473000	8	402360	25009	34846	67946	52844	46850	53984	36803	84074
	1.13873	0.139259	Q15758	Q15758	Neutral amino acid transporter B(0)	SLC1A5	24.3005	24.3394	24.3635	24.1904	24.0959	24.2403	24.2525	24.048	572	7	7	7	15.7	15.7	15.7	56.598	0	65.221	172090000	68	10755000	976480	795430	1700400	1549000	1085400	1553900	1114900	1980000
	0.74921	0.131938	P78527	P78527	DNA-dependent protein kinase catalytic subunit	PRKDC	26.8654	26.9355	26.74	26.6196	26.7158	26.5459	26.7693	26.6017	470	70	70	70	18.5	18.5	18.5	469.08	0	323.31	991350000	356	4506200	388730	329930	762900	497570	498060	666340	462440	900200
	0.14033	0.127853	Q9NQC3	Q9NQC3	Reticulon-4	RTN4	23.1205	23.0791	24.0833	24.1441	22.9414	23.6972	23.5599	23.7171	719	6	6	6	8.8	8.8	8.8	129.93	0	64.939	120350000	42	2674400	139450	131100	429810	463710	175220	492550	241070	601470
	0.0893582	0.122458	P06576	P06576	ATP synthase subunit beta, mitochondrial	ATP5B	21.6774	20.8307	21.0068	20.5591	22.0703	21.0391	20.1132	20.3614	141	5	5	5	14.6	14.6	14.6	56.559	0	38.644	18783000	11	647700	117140	37329	53041	34750	147540	141710	27628	88570
	0.159928	0.117865	P12268;P20839	P12268	Inosine-5-monophosphate dehydrogenase 2	IMPDH2	21.7194	22.2637	22.893	22.7847	22.186	22.543	22.1592	22.3012	192	6	6	6	12.5	12.5	12.5	55.804	0	68.512	52556000	27	2388900	56050	112860	460380	393400	217160	419250	213670	516140
	0.585044	0.111817	Q9Y678;Q9UBF2	Q9Y678	Coatomer subunit gamma-1	COPG1	23.3376	23.6238	23.5591	23.7312	23.3707	23.5361	23.4334	23.4641	783	12	12	12	16.9	16.9	16.9	97.717	0	174.83	107450000	29	2193000	151300	169420	358230	350110	163410	338720	196230	465550
	0.122965	0.0984502	O95573;O60488	O95573	Long-chain-fatty-acid--CoA ligase 3	ACSL3	22.7596	23.3944	23.9736	23.8529	23.0701	23.379	23.5466	23.5909	106	11	11	11	18.1	18.1	18.1	80.419	0	69.4	111080000	25	3366000	154750	147770	599700	527220	341770	534200	291090	769530
	0.371735	0.0815182	P04792	P04792	Heat shock protein beta-1	HSPB1	22.4732	22.4604	22.6773	22.6531	22.2908	22.4996	22.6616	22.486	125	5	5	5	26.3	26.3	26.3	22.782	0	30.307	55986000	13	3999000	268970	177110	562980	570210	422460	636120	428350	932810
	0.0785985	0.0787821	O14745	O14745	Na(+)/H(+) exchange regulatory cofactor NHE-RF1	SLC9A3R1	20.4747	20.7157	21.5164	21.6158	20.5507	21.2514	20.715	21.4903	36	3	3	3	11.2	11.2	11.2	38.868	0	21.853	21666000	14	1031700	27771	63612	177830	196800	53259	182500	74707	255250
	0.134312	0.0748925	P53621	P53621	Coatomer subunit alpha;Xenin;Proxenin	COPA	22.3222	22.7645	23.1135	23.1481	22.7089	22.7468	22.5939	22.999	376	13	13	13	11.8	11.8	11.8	138.34	0	86.813	71983000	22	1028300	20184	43443	196800	169730	68292	168770	100850	260270
	0.219313	0.0735507	Q00610;P53675	Q00610	Clathrin heavy chain 1	CLTC	23.7067	23.6623	23.6178	23.3027	23.4962	23.2884	23.7608	23.45	480	16	16	16	13.8	13.8	13.8	191.61	0	115.39	108940000	42	1210500	118180	83044	157560	157730	108070	171040	128220	286610
	0.0374438	0.0721159	Q9HC07	Q9HC07	Transmembrane protein 165	TMEM165	21.344	18.988	21.1361	20.5313	19.6184	21.0403	21.1897	19.8625	713	2	2	2	13.6	13.6	13.6	34.905	0	14.267	16158000	5	1077200	146540	120080	175980	125850	69455	182400	138280	118610
	0.101261	0.070653	P62081	P62081	40S ribosomal protein S7	RPS7	23.4316	23.2627	22.9712	23.3098	23.5081	23.3565	23.3577	22.4704	419	5	5	5	30.4	30.4	30.4	22.127	0	36.515	83642000	39	8364200	904210	713820	422950	1180100	1248600	1431300	1021200	1441900
	0.0381845	0.0692859	P50990	P50990	T-complex protein 1 subunit theta	CCT8	20.4852	19.6671	20.7407	20.7897	18.6543	20.8856	20.7208	21.1449	353	5	5	5	9.9	9.9	9.9	59.62	0	29.802	16043000	4	433600	12289	13710	49815	44403	22309	99233	50614	141220
	0.146378	0.0562248	P62701;Q8TD47;P22090	P62701;Q8TD47;P22090	40S ribosomal protein S4, X isoform;40S ribosomal protein S4, Y isoform 2;40S ribosomal protein S4, Y isoform 1	RPS4X;RPS4Y2;RPS4Y1	23.8462	23.3861	23.3803	23.4422	23.2357	23.4896	23.6914	23.4133	435	9	9	9	32.3	32.3	32.3	29.597	0	59.451	105290000	39	6580900	686570	404890	874290	821010	534970	1155200	761140	1342800
	0.0550107	0.0561743	P04899	P04899	Guanine nucleotide-binding protein G(i) subunit alpha-2	GNAI2	21.359	21.8193	22.4117	22.5625	21.3517	22.2091	21.9609	22.4061	128	4	2	2	15.5	9	9	40.45	0	69.899	41645000	18	2449700	120780	138720	390650	418130	155670	406790	208720	610220
	0.408216	0.0543809	P11142;P54652	P11142	Heat shock cognate 71 kDa protein	HSPA8	27.1165	27.0855	26.9367	26.9865	27.0046	26.9676	27.066	26.8695	180	19	18	14	37.8	36.7	29.7	70.897	0	323.31	1187200000	304	35977000	3503600	2819900	4888800	5045000	3950700	5420500	3684700	6663800
	0.0326187	0.0480795	Q5BKZ1	Q5BKZ1	DBIRD complex subunit ZNF326	ZNF326	19.8475	18.5661	20.4992	19.4865	18.6404	19.9924	19.8444	19.7298	585	2	2	2	4.3	4.3	4.3	65.653	0	18.125	6307800	2	217510	23335	9152.4	15901	12760	16851	52940	27904	58667
	0.019351	0.0461154	P61604	P61604	10 kDa heat shock protein, mitochondrial	HSPE1	21.262	20.1647	18.1841	20.392	20.5335	20.7367	18.596	19.9522	414	2	2	2	23.5	23.5	23.5	10.932	0	13.374	13577000	5	1697100	238210	178470	198830	172640	198840	351400	154510	204230
	0.0734501	0.0412912	P51648	P51648	Fatty aldehyde dehydrogenase	ALDH3A2	20.9286	21.1884	21.5521	21.6061	21.1269	21.0962	21.2558	21.631	364	4	4	4	8.7	8.7	8.7	54.847	0	27.019	24559000	6	1116300	38217	72845	198680	196620	62407	183640	100810	263080
	0.0444135	0.0408578	Q9BSJ8	Q9BSJ8	Extended synaptotagmin-1	ESYT1	24.3807	25.0018	25.6464	25.492	24.7068	25.2656	25.0193	25.3658	690	14	14	14	16.9	16.9	16.9	122.85	0	113.09	302730000	51	6178200	747510	867770	1147500	1244000	367490	597990	379910	826060
	0.0875094	0.0271506	P60660;P14649	P60660	Myosin light polypeptide 6	MYL6	22.3031	22.3982	22.3434	22.564	22.1637	22.3449	22.3578	22.6336	392	3	3	3	22.5	22.5	22.5	16.93	0	27.318	49772000	12	4977200	365190	303450	612230	757930	617590	724340	473980	1122500
	0.0508017	0.0220718	P12270	P12270	Nucleoprotein TPR	TPR	22.5068	22.7232	22.3847	22.2199	22.72	22.2592	22.4989	22.2682	193	15	15	15	7.3	7.3	7.3	267.29	0	89.047	50178000	25	464610	38630	37670	62172	56717	55429	68321	53026	92644
	0.00939652	0.0122485	P52701	P52701	DNA mismatch repair protein Msh6	MSH6	20.0062	19.9158	19.7075	19.4326	18.5151	20.1744	19.9845	20.3391	371	2	2	2	2.3	2.3	2.3	152.78	0	16.652	8105400	7	114160	12244	8907.4	12065	2332.3	8567.6	23772	14071	32200
	0.0161957	0.00737858	Q7Z478	Q7Z478	ATP-dependent RNA helicase DHX29	DHX29	21.1656	21	21.2266	20.9624	20.8138	21.211	20.8867	21.4136	613	5	5	5	5	5	5	155.23	0	34.092	25168000	11	354480	14119	11516	35321	30136	23937	84155	34469	120830
	0.00230459	0.00110626	Q15149	Q15149	Plectin	PLEC	25.5128	25.401	25.1717	24.8613	25.377	25.044	25.2811	25.2403	558	53	53	47	14.3	14.3	12.3	531.78	0	323.31	366710000	162	1264500	103440	62578	141720	99893	175810	239490	146260	295330
	0.000577473	0.000339985	P30508;Q29960;Q07000;P30505;P30501;Q95604;P30492;Q9TNN7;P30510;P04222;P30455;P30443;P30504;Q09160	P30508;Q29960;Q07000;P30505;P30501;Q95604;P30492;Q9TNN7;P30510;P04222;P30455;P30443;P30504	HLA class I histocompatibility antigen, Cw-12 alpha chain;HLA class I histocompatibility antigen, Cw-16 alpha chain;HLA class I histocompatibility antigen, Cw-15 alpha chain;HLA class I histocompatibility antigen, Cw-8 alpha chain;HLA class I histocompatibility antigen, Cw-2 alpha chain;HLA class I histocompatibility antigen, Cw-17 alpha chain;HLA class I histocompatibility antigen, B-54 alpha ch…	HLA-C;HLA-B;HLA-A	22.2191	22.4306	22.546	22.944	22.1678	22.6997	22.6378	22.633	272	8	5	1	26.2	15.8	2.2	40.885	0	80.325	58293000	33	3238500	207040	120900	481370	569970	210770	569620	316830	761970
	0.00344139	-0.00111675	P62249	P62249	40S ribosomal protein S16	RPS16	21.1877	21.3162	21.1323	20.8631	21.2451	21.0261	21.1765	21.0561	423	2	2	2	12.3	12.3	12.3	16.445	0.001634	11.711	19931000	6	1811900	161780	154420	240120	157360	244930	270400	198130	384720
	0.028377	-0.0109868	P63261;P60709;Q6S8J3;A5A3E0;P0CG38;Q562R1;P0CG39;Q9BYX7	P63261;P60709	Actin, cytoplasmic 2;Actin, cytoplasmic 2, N-terminally processed;Actin, cytoplasmic 1;Actin, cytoplasmic 1, N-terminally processed	ACTG1;ACTB	28.6511	28.4957	28.2602	28.2443	28.624	28.3881	28.4854	28.1977	393	15	15	4	44	44	16.5	41.792	0	323.31	3194000000	443	159700000	16561000	12824000	21344000	19353000	19526000	24113000	18800000	27176000
	0.0453454	-0.0164747	P00338	P00338	L-lactate dehydrogenase A chain	LDHA	19.8642	20.2865	20.3244	20.4399	20.1988	20.2551	20.2644	20.2626	111	2	2	2	5.7	5.7	5.7	36.688	0.0015576	11.356	11229000	5	623820	33265	43238	92444	101650	65525	95931	61287	130480
	0.0525443	-0.016479	Q8NF37	Q8NF37	Lysophosphatidylcholine acyltransferase 1	LPCAT1	21.7972	22.155	22.1642	21.9014	21.9462	22.1949	21.9312	22.0114	635	4	4	4	8.1	8.1	8.1	59.151	0	55.252	39944000	19	1902100	69648	98987	274320	251170	210810	359230	192980	444920
	0.0155422	-0.0198445	Q03135;P56539	Q03135	Caveolin-1	CAV1	22.4754	23.182	24.0544	24.0454	23.0621	23.5609	23.2286	23.985	492	4	4	4	28.1	28.1	28.1	20.471	0	40.476	119240000	35	11924000	438100	566580	2054900	1873500	812430	2085300	783830	3308900
	0.0454964	-0.0215359	P18031	P18031	Tyrosine-protein phosphatase non-receptor type 1	PTPN1	21.5777	21.8074	21.9781	22.0253	21.559	21.9659	21.7792	22.1705	217	5	5	5	12.2	12.2	12.2	49.966	0	36.706	36356000	13	1253600	47734	64050	180000	202800	118760	206440	116970	316890
	0.0517998	-0.0231605	P33993	P33993	DNA replication licensing factor MCM7	MCM7	25.4308	25.0447	24.9655	24.7309	25.1207	25.0194	25.198	24.9264	291	21	21	21	32.8	32.8	32.8	81.307	0	202.52	303710000	133	7992400	898480	586110	1077900	820750	794250	1363100	958190	1493600
	0.0233851	-0.0291414	P11498	P11498	Pyruvate carboxylase, mitochondrial	PC	32.8455	32.2839	31.6844	31.1574	32.5705	31.6862	32.1684	31.6627	187	50	50	50	61.2	61.2	61.2	129.63	0	323.31	40202000000	3821	681390000	108860000	63856000	76496000	53786000	110110000	84519000	71294000	112470000
	0.0312405	-0.0387831	Q8IVF2	Q8IVF2	Protein AHNAK2	AHNAK2	19.2616	19.4039	19.0795	19.5263	18.1388	19.7974	19.5236	19.9666	620	2	2	2	0.6	0.6	0.6	616.62	0.0015723	11.416	6172200	3	20105	1277.2	662.86	1456.5	2812.6	777.85	5127.8	2150.6	5839.4
	0.0596919	-0.0461426	Q15436	Q15436	Protein transport protein Sec23A	SEC23A	19.8585	20.1014	20.4797	20.2657	19.5074	20.5034	20.3813	20.4978	565	3	3	1	4.8	4.8	1.7	86.16	0	28.966	12314000	5	332810	7722.8	4702.6	54895	47117	0	89895	31306	97176
	0.0288481	-0.0490527	O75955	O75955	Flotillin-1	FLOT1	18.7159	19.4417	20.9029	20.8345	20.516	20.2886	19.726	19.5608	96	2	2	2	6.3	6.3	6.3	47.355	0	13.695	13346000	5	494280	59754	48653	101530	85853	47984	50043	40049	60417
	0.154172	-0.0555019	P14618;P30613	P14618	Pyruvate kinase PKM	PKM	21.9833	22.2208	22.1197	22.4089	22.4646	22.3631	22.1071	22.0199	199	7	7	7	18.8	18.8	18.8	57.936	0	63.099	43703000	16	1324300	97186	99888	97652	201290	174310	260340	114010	279640
	0.142137	-0.0664268	Q12907	Q12907	Vesicular integral-membrane protein VIP36	LMAN2	21.3381	21.3056	21.834	21.6233	21.3017	21.8467	21.4687	21.7496	517	5	5	5	16.9	16.9	16.9	40.228	0	29.686	27817000	12	1545400	86507	106330	195260	173330	190690	318930	197500	276820
	0.0614931	-0.06949	Q07021	Q07021	Complement component 1 Q subcomponent-binding protein, mitochondrial	C1QBP	18.9509	19.7698	19.9263	20.6465	19.7677	20.4805	19.6104	19.713	500	2	2	2	8.5	8.5	8.5	31.362	0.0016978	12.096	6920700	3	532360	24999	43359	30951	29184	75664	149220	51076	127910
	0.0687617	-0.0886517	P52272	P52272	Heterogeneous nuclear ribonucleoprotein M	HNRNPM	20.9151	20.5364	20.7168	20.1136	19.3809	21.1664	21.0141	21.0751	367	2	2	2	5.3	5.3	5.3	77.515	0	25.392	16687000	12	355040	31497	19629	44898	27847	33252	71718	40268	85935
	0.154768	-0.0916576	P32969	P32969	60S ribosomal protein L9	RPL9	25.0671	24.7209	24.6094	24.2045	24.9651	24.9709	24.6475	24.3851	285	6	6	6	51.6	51.6	51.6	21.863	0	140.73	235350000	76	26150000	3202300	2122500	3813700	2863900	2993000	4124500	2592300	4437300
	0.145878	-0.0987453	Q969M3	Q969M3	Protein YIPF5	YIPF5	21.0721	21.2688	21.9449	22.0232	21.6235	21.7616	21.4343	21.8845	664	2	2	2	8.2	8.2	8.2	27.989	0	14.651	31229000	16	15614000	831010	827500	2432200	2455000	1609800	2534600	1274900	3649400
	0.259726	-0.105599	P58107	P58107	Epiplakin	EPPK1	24.767	24.4253	24.3699	24.0526	24.687	24.5966	24.342	24.4116	390	22	16	16	21.8	15.8	15.8	555.65	0	189.3	216830000	75	794240	74088	50620	85315	71925	86211	166900	100340	158840
	0.233249	-0.105812	P07384	P07384	Calpain-1 catalytic subunit	CAPN1	19.016	19.8503	19.641	19.6417	19.6632	19.6385	19.5626	19.7081	147	2	2	2	3.9	3.9	3.9	81.889	0	12.609	5994600	2	166520	2534.1	8519.4	29139	27384	5688.7	31536	17851	43865
	0.406662	-0.120048	Q07065	Q07065	Cytoskeleton-associated protein 4	CKAP4	19.5178	19.8086	19.2986	19.2357	19.5716	19.5545	19.6177	19.5972	501	2	2	2	5.1	5.1	5.1	66.022	0	12.386	6141000	3	161610	14309	0	17455	19169	21589	29286	19552	40245
	0.22158	-0.124573	Q7KZ85	Q7KZ85	Transcription elongation factor SPT6	SUPT6H	19.5638	19.0064	19.3051	19.2129	18.8735	19.4504	19.4548	19.8079	606	3	3	3	2.3	2.3	2.3	199.07	0	19.172	3980700	3	49759	0	0	0	0	4478	10021	6185.1	29075
	0.327922	-0.131492	Q13813	Q13813	Spectrin alpha chain, non-erythrocytic 1	SPTAN1	22.2047	22.4687	22.1872	22.056	22.7342	22.2927	22.0228	22.3928	531	14	14	14	7.3	7.3	7.3	284.54	0	91.069	47873000	23	334780	21808	17606	40596	38538	42163	57185	36063	80820
	0.11532	-0.150498	Q9Y266	Q9Y266	Nuclear migration protein nudC	NUDC	19.6887	20.0362	20.3153	20.3506	18.8754	20.6573	20.6219	20.8382	768	3	3	3	10.6	10.6	10.6	38.242	0	19.184	11558000	4	550400	0	19459	75785	68959	15705	110990	85913	173590
	0.193644	-0.15138	P08240	P08240	Signal recognition particle receptor subunit alpha	SRPR	21.2652	21.6766	22.1508	22.0799	21.395	22.3094	21.7351	22.3384	156	6	6	6	10.7	10.7	10.7	69.81	0	50.804	37976000	20	1085000	45333	48761	170760	160230	93187	194670	95413	276690
	0.234002	-0.152769	Q01082;P11277;O15020	Q01082	Spectrin beta chain, non-erythrocytic 1	SPTBN1	20.9475	21.6453	22.1177	21.8283	21.6049	21.7584	21.7616	22.025	482	10	10	10	5.1	5.1	5.1	274.61	0	60.597	32565000	20	229330	8912	13820	39398	26384	27260	41823	21978	49753
	0.458545	-0.159711	Q9NR30;Q9BQ39	Q9NR30	Nucleolar RNA helicase 2	DDX21	20.5837	20.3435	19.9802	20.0427	20.5025	20.1892	20.4627	20.4346	721	3	3	3	4.3	4.3	4.3	87.343	0	17.416	12165000	3	304130	23042	12783	15280	16058	50961	53808	44265	87935
	1.13361	-0.16223	Q8IVT2	Q8IVT2	Mitotic interactor and substrate of PLK1	MISP	21.7227	21.5023	21.6078	21.5326	21.7063	21.6462	21.9107	21.7512	621	8	8	8	15.5	15.5	15.5	75.356	0	47.973	31512000	17	926820	83121	37131	115440	132000	81261	143920	78791	255150
	1.05286	-0.170832	Q8TCJ2	Q8TCJ2	Dolichyl-diphosphooligosaccharide--protein glycosyltransferase subunit STT3B	STT3B	21.3491	21.4628	21.4656	21.3744	21.3735	21.5929	21.6153	21.7535	638	4	4	3	4.8	4.8	4	93.673	0	28.415	28065000	12	825440	62783	30185	97268	60264	82315	163130	103150	226340
	0.334929	-0.170969	P04406	P04406	Glyceraldehyde-3-phosphate dehydrogenase	GAPDH	22.7847	22.4344	22.5395	22.5655	23.3313	22.704	22.5995	22.3732	124	4	4	4	15.2	15.2	15.2	36.053	0	43.167	59390000	26	3493500	320550	216180	438400	458690	556900	606290	320580	575920
	0.211643	-0.174014	Q01780	Q01780	Exosome component 10	EXOSC10	18.8585	19.4454	18.8229	19.4068	18.5171	19.7585	19.3078	19.6464	485	2	2	2	2.9	2.9	2.9	100.83	0	13.225	3441000	3	62564	0	0	0	0	0	26252	8715.5	27596
	0.1719	-0.186331	O94979	O94979	Protein transport protein Sec31A	SEC31A	22.6137	22.8688	23.9379	23.8754	22.9	23.8894	23.3214	23.9302	98	14	14	14	15.8	15.8	15.8	133.01	0	95.051	119220000	39	2536600	57468	98356	379010	376140	179560	492300	198590	755140
	0.427909	-0.194894	P63104	P63104	14-3-3 protein zeta/delta	YWHAZ	21.2195	21.5637	21.2941	21.3444	22.0783	21.5193	21.1926	21.4112	456	4	3	3	24.1	20.8	20.8	27.745	0	29.973	26518000	11	1894100	99241	144950	237480	281460	201850	320980	179210	428940
	0.800228	-0.204628	P0DMV9;P0DMV8	P0DMV9;P0DMV8	Heat shock 70 kDa protein 1B;Heat shock 70 kDa protein 1A	HSPA1B;HSPA1A	25.3586	25.2238	24.9743	25.1229	25.4618	25.2997	25.5935	25.1431	169	15	13	6	29.3	26.2	11.1	70.051	0	172.19	359460000	132	11233000	1057000	687390	1111500	1276500	1486900	1885500	1454500	2273700
	0.41082	-0.207588	Q6NZI2	Q6NZI2	Polymerase I and transcript release factor	PTRF	20.9518	21.4657	21.1209	21.3746	21.3465	21.6451	20.9439	21.8079	597	3	3	3	11.3	11.3	11.3	43.476	0	40.657	25167000	12	1572900	97200	122770	188330	208860	91544	323850	119420	420960
	0.0995047	-0.210259	O75915	O75915	PRA1 family protein 3	ARL6IP5	20.7487	18.5651	21.0158	20.6306	18.9433	21.0025	20.5057	21.3497	95	2	2	2	16	16	16	21.614	0	14.187	16482000	7	3296300	278990	181440	548870	404100	150510	548020	273130	911230
	0.208581	-0.215147	Q16795	Q16795	NADH dehydrogenase [ubiquinone] 1 alpha subcomplex subunit 9, mitochondrial	NDUFA9	20.9555	19.3379	20.0094	19.6943	20.6495	20.3294	20.2705	19.6084	575	3	3	3	11.4	11.4	11.4	42.509	0	17.741	10629000	11	393660	42783	16172	39314	27235	69424	63079	54925	80726
	1.20239	-0.232678	P04843	P04843	Dolichyl-diphosphooligosaccharide--protein glycosyltransferase subunit 1	RPN1	23.6704	23.461	23.4726	23.7361	23.6696	23.9609	23.71	23.9304	126	13	13	13	25.2	25.2	25.2	68.569	0	116.24	130640000	54	3530900	201690	162570	369710	391180	276020	745820	420800	963110
	1.0495	-0.244409	P41252	P41252	Isoleucine--tRNA ligase, cytoplasmic	IARS	23.0704	22.8722	22.7822	22.6983	22.9801	22.9706	23.3588	23.0912	315	11	11	11	11.5	11.5	11.5	144.5	0	67.879	76908000	26	1326000	86844	70864	125880	139890	139980	230120	177860	354570
	0.492118	-0.250317	P30041	P30041	Peroxiredoxin-6	PRDX6	21.2379	21.5077	21.8328	21.4691	21.319	22.158	21.5495	22.0222	268	4	4	4	20.5	20.5	20.5	25.035	0	52.265	32338000	24	2155800	59527	91521	315190	346050	137740	429950	230080	545800
	1.272	-0.252462	P60842;Q14240	P60842;Q14240	Eukaryotic initiation factor 4A-I;Eukaryotic initiation factor 4A-II;Eukaryotic initiation factor 4A-II, N-terminally processed	EIF4A1;EIF4A2	23.6187	23.5757	23.6248	23.2926	23.6598	23.9079	23.6609	23.893	394	10	10	9	25.4	25.4	23.2	46.153	0	92.709	125950000	58	5476200	358300	214100	695720	501910	641720	1146600	583690	1334200
	1.54327	-0.269795	P54136	P54136	Arginine--tRNA ligase, cytoplasmic	RARS	21.7423	21.7286	21.51	21.7347	21.9702	21.7306	22.0252	22.0688	380	8	8	8	13.6	13.6	13.6	75.378	0	46.434	34714000	12	938210	40608	40977	76740	79963	140420	167210	136860	255430
	0.215202	-0.271183	Q03519	Q03519	Antigen peptide transporter 2	TAP2	19.0422	19.502	20.5701	19.8811	18.8797	20.3692	20.2579	20.5733	494	3	3	3	3.9	3.9	3.9	75.663	0	16.904	12346000	4	411520	14400	25429	58658	69440	42499	71052	39359	90688
	0.309741	-0.274027	Q9HCC0	Q9HCC0	Methylcrotonoyl-CoA carboxylase beta chain, mitochondrial	MCCC2	22.8037	21.9602	21.5856	21.143	22.3721	21.8485	22.3189	22.0491	714	5	5	5	12.3	12.3	12.3	61.332	0	41.319	37429000	21	1336700	223190	107260	117310	75932	191990	125460	197640	297960
	0.561758	-0.276577	O75340	O75340	Programmed cell death protein 6	PDCD6	23.5628	23.9319	24.2773	24.2887	24.0873	24.6238	23.984	24.472	83	6	6	6	40.8	40.8	40.8	21.868	0	106.83	179760000	69	16341000	849310	799650	2432400	2417300	1481000	3101300	1450300	3810200
	0.30657	-0.277013	Q9P0L0	Q9P0L0	Vesicle-associated membrane protein-associated protein A	VAPA	22.5075	22.7499	23.6747	23.7959	22.9497	23.6801	23.3547	23.8515	736	5	5	4	24.9	24.9	20.1	27.893	0	43.716	107240000	37	7659900	289720	320560	1174900	1233500	560170	1179000	708640	2193400
	0.530111	-0.287327	P42285	P42285	Superkiller viralicidic activity 2-like 2	SKIV2L2	19.0204	19.0799	19.5215	18.4698	18.9399	19.5213	19.3679	19.4118	317	2	2	2	2	2	2	117.8	0.0016835	12.024	3588500	5	61871	0	0	5473.4	0	4701	18191	10264	23241
	0.53519	-0.289068	P62258	P62258	14-3-3 protein epsilon	YWHAE	22.0692	22.6196	22.956	23.0077	22.597	23.1852	22.9729	23.0537	424	5	5	4	22.4	22.4	19.2	29.174	0	29.533	70829000	17	4166400	215480	234430	575830	558580	335630	852740	387690	1006000
	1.06724	-0.289675	O95347	O95347	Structural maintenance of chromosomes protein 2	SMC2	20.9968	20.8028	20.5307	20.893	21.0061	21.2219	21.2938	20.8601	102	5	5	5	4.5	4.5	4.5	135.65	0	30.322	18072000	10	278030	36806	20713	46453	42693	13824	24478	21672	71390
	0.548306	-0.302828	Q7Z2W4	Q7Z2W4	Zinc finger CCCH-type antiviral protein 1	ZC3HAV1	20.0091	20.9129	20.8969	20.8281	20.6693	21.0249	20.8575	21.3066	611	5	5	5	7.9	7.9	7.9	101.43	0	51.913	17692000	17	310380	9337.2	21006	36937	40002	33323	53283	34165	82326
	1.32554	-0.304744	P61026	P61026	Ras-related protein Rab-10	RAB10	20.6578	20.6067	20.747	21.0117	21.0833	20.8694	21.0196	21.2698	403	4	3	3	20.5	15	15	22.541	0	17.949	19711000	10	1516200	59571	42587	116090	206120	186110	234050	154710	516970
	0.150987	-0.306299	Q6RW13	Q6RW13	Type-1 angiotensin II receptor-associated protein	AGTRAP	19.6618	22.4078	22.6636	22.9941	21.9752	22.1622	22.2827	22.5324	601	3	3	3	29.6	29.6	29.6	17.419	0	27.864	48261000	14	6894400	109640	519820	1195800	1471500	497470	720010	663050	1717200
	1.19851	-0.311699	O14980	O14980	Exportin-1	XPO1	19.1575	19.5896	19.2856	19.6297	19.7428	19.9294	19.5949	19.6422	42	2	2	2	2.5	2.5	2.5	123.38	0	14.91	4610800	2	86997	0	0	0	0	16152	30072	11594	29179
	0.465055	-0.313805	P07355;A6NMY6	P07355;A6NMY6	Annexin A2;Putative annexin A2-like protein	ANXA2;ANXA2P2	26.7253	27.173	27.8451	27.9157	27.4788	27.9839	27.6354	27.8162	146	18	18	18	53.1	53.1	53.1	38.604	0	323.31	1978000000	326	86002000	3593300	3479900	12519000	13025000	7959000	17640000	7905000	19882000
	0.91455	-0.316056	P08670;P17661;P41219;Q16352;P07196;P07197;P12036	P08670	Vimentin	VIM	23.922	23.9142	23.6395	23.762	24.4154	23.9892	23.7322	24.3651	158	15	13	13	33.5	30.3	30.3	53.651	0	112.61	150640000	45	4430500	297300	311290	557820	471840	665080	691370	386720	1049100
	0.395945	-0.317519	O75525	O75525	KH domain-containing, RNA-binding, signal transduction-associated protein 3	KHDRBS3	18.9818	18.7777	20.013	19.8795	19.4536	19.642	19.6229	20.2036	88	3	3	3	7.8	7.8	7.8	38.799	0	17.194	6203500	4	516960	0	0	64724	36871	30822	124840	66702	192990
	0.594111	-0.320356	P23528;Q9Y281	P23528	Cofilin-1	CFL1	23.5255	23.8668	23.7817	24.1903	23.5259	24.4052	24.4296	24.285	244	5	5	5	37.3	37.3	37.3	18.502	0	45.373	164800000	44	16480000	660220	862660	1594100	2066500	1492300	3666300	1973700	4163900
	0.125216	-0.322629	P53007	P53007	Tricarboxylate transport protein, mitochondrial	SLC25A1	22.8265	22.9182	19.0565	22.8912	22.6292	22.104	22.2214	22.0284	373	3	3	3	10.3	10.3	10.3	34.012	0	18.422	49434000	10	2907900	266670	306710	277950	523970	392720	430500	259210	450120
	0.571601	-0.326484	Q9Y5M8	Q9Y5M8	Signal recognition particle receptor subunit beta	SRPRB	21.7902	21.3833	22.3087	22.3064	21.9259	22.551	22.1408	22.4768	781	5	5	5	27.7	27.7	27.7	29.702	0	39.96	46144000	13	2884000	84002	61328	459440	343840	285340	528400	317380	804280
	0.286339	-0.329246	P62333	P62333	26S protease regulatory subunit 10B	PSMC6	19.0806	19.2407	19.2593	19.0761	18.3348	20.6651	19.4432	19.5306	431	2	2	2	7.5	7.5	7.5	44.172	0	14.042	7257800	3	345610	18346	18368	37811	27922	28832	92716	35553	86061
	1.71334	-0.33299	Q9NZB2	Q9NZB2	Constitutive coactivator of PPAR-gamma-like protein 1	FAM120A	20.5134	20.1486	20.4648	20.2956	20.5313	20.746	20.6485	20.8285	733	3	3	3	3.2	3.2	3.2	121.89	0	20.413	14201000	7	249140	16123	13930	24457	18377	22103	45727	35036	73385
	0.650831	-0.335809	Q7L014	Q7L014	Probable ATP-dependent RNA helicase DDX46	DDX46	19.532	20.2137	20.2834	20.635	20.4069	20.4426	20.3894	20.7685	608	5	5	5	5.8	5.8	5.8	117.36	0	36.954	13136000	12	247850	0	5459.2	11782	25056	24629	59157	32173	89592
	1.1017	-0.340865	Q9P2J5	Q9P2J5	Leucine--tRNA ligase, cytoplasmic	LARS	21.7048	21.7307	21.3212	21.4535	21.6707	21.7311	22.2346	21.9373	740	5	5	5	6	6	6	134.46	0	33.472	31834000	16	513450	39215	30647	47242	49431	55555	88312	72779	130270
	0.545185	-0.342555	O75396	O75396	Vesicle-trafficking protein SEC22b	SEC22B	21.8297	22.083	22.8166	22.8882	22.4133	22.9549	22.7046	22.9149	86	6	6	6	35.8	35.8	35.8	24.593	0	120.96	62596000	28	4471200	229830	256850	757430	770130	278360	763750	296450	1118400
	1.02133	-0.342966	P62495	P62495	Eukaryotic peptide chain release factor subunit 1	ETF1	21.1708	21.3319	21.4568	21.6624	21.472	21.7448	21.6479	22.1291	434	3	3	3	7.6	7.6	7.6	49.03	0	20.966	32910000	6	1316400	36767	37138	90974	234980	76396	336420	84819	418900
	1.09963	-0.344613	Q14683	Q14683	Structural maintenance of chromosomes protein 1A	SMC1A	22.5047	22.6129	22.4272	22.4028	22.3729	22.8945	23.0061	23.0525	545	13	13	13	11.5	11.5	11.5	143.23	0	78.845	63657000	30	884120	39823	57148	79075	53023	84263	208680	110980	251130
	0.327774	-0.347434	P49327	P49327	Fatty acid synthase;[Acyl-carrier-protein] S-acetyltransferase;[Acyl-carrier-protein] S-malonyltransferase;3-oxoacyl-[acyl-carrier-protein] synthase;3-oxoacyl-[acyl-carrier-protein] reductase;3-hydroxyacyl-[acyl-carrier-protein] dehydratase;Enoyl-[acyl-carrier-protein] reductase;Oleoyl-[acyl-carrier-protein] hydrolase	FASN	25.2454	25.7889	26.8511	26.8823	25.9928	26.8179	26.5044	26.8424	345	53	53	53	27.5	27.5	27.5	273.42	0	323.31	920120000	302	7361000	163510	240860	1218900	1190900	481340	1435600	686390	1943400
	1.06895	-0.358932	P33991	P33991	DNA replication licensing factor MCM4	MCM4	23.8824	23.4713	23.2593	23.0739	23.7461	23.807	23.7613	23.8082	289	14	14	14	21	21	21	96.557	0	153.26	120610000	56	2680200	193010	136850	231510	152810	358850	545500	325810	735800
	1.78032	-0.361868	P07900;Q14568;Q58FF6;Q58FG0;Q58FG1	P07900	Heat shock protein HSP 90-alpha	HSP90AA1	21.7684	21.7909	21.9447	21.7273	21.8958	22.3081	22.1519	22.323	151	14	7	7	22	10.9	10.9	84.659	0	44.509	38207000	12	1157800	26148	82040	139900	91365	159620	209490	183970	265260
	0.323775	-0.363587	P48444	P48444	Coatomer subunit delta	ARCN1	21.2589	19.1888	21.12	20.7168	20.8893	21.0366	20.8529	20.9601	341	5	5	5	10.6	10.6	10.6	57.21	0	33.995	17860000	12	661480	65348	17922	125000	70885	68756	103060	55969	154540
	0.443208	-0.365234	Q92598;O95757	Q92598;O95757	Heat shock protein 105 kDa;Heat shock 70 kDa protein 4L	HSPH1;HSPA4L	19.4817	20.1075	19.1741	19.0049	18.9793	20.0884	20.1576	20.004	651	2	2	2	2.9	2.9	2.9	96.864	0	13.817	5752900	4	122400	0	0	0	13453	10734	34207	21783	42226
	1.03561	-0.373905	P43246	P43246	DNA mismatch repair protein Msh2	MSH2	21.4685	21.3302	20.8012	20.9573	21.2353	21.675	21.6607	21.4818	324	6	6	6	7.9	7.9	7.9	104.74	0	39.611	22879000	17	508430	58775	44044	38826	42976	71321	89659	58682	104150
	2.21786	-0.382656	Q09666	Q09666	Neuroblast differentiation-associated protein AHNAK	AHNAK	25.4701	25.4985	25.5206	25.7534	25.8353	26.0908	25.8306	26.0166	508	53	53	53	20.8	20.8	20.8	629.09	0	323.31	542300000	196	1442300	75278	75182	170580	165560	155000	297580	144550	358570
	0.530031	-0.383758	P07437;Q13509;CON__ENSEMBL:ENSBTAP00000025008;A6NNZ2;Q9BUF5;Q9H4B7	P07437;Q13509	Tubulin beta chain;Tubulin beta-3 chain	TUBB;TUBB3	23.6168	23.2738	23.5321	23.5205	24.8324	23.6921	23.5518	23.402	148	10	10	3	28.8	28.8	9.9	49.67	0	111.21	134880000	41	6743800	400850	273330	638450	666940	1699900	1186700	665940	1211700
	0.467571	-0.383923	Q06830	Q06830	Peroxiredoxin-1	PRDX1	24.6477	25.5572	25.8324	26.266	25.5604	26.2017	25.9434	26.1337	498	10	10	7	49.2	49.2	36.2	22.11	0	114.12	582730000	107	38849000	1114200	1846900	4997400	5729700	3389200	7136700	4061200	10573000
	2.75626	-0.391631	P08238;Q58FF7	P08238	Heat shock protein HSP 90-beta	HSP90AB1	24.3129	24.4569	24.2159	24.5187	24.8088	24.797	24.7704	24.6947	155	15	15	6	25.1	25.1	10.9	83.263	0	132.22	232770000	64	7053700	405860	359430	744520	834480	875710	1363800	833520	1636400
	0.906281	-0.395374	P33992	P33992	DNA replication licensing factor MCM5	MCM5	21.3415	21.3924	21.0867	20.4682	21.5997	21.3776	21.3451	21.548	290	3	3	3	5.2	5.2	5.2	82.285	0	24.841	22869000	4	544510	50721	41835	65494	57667	79919	89497	41125	118250
	1.02209	-0.396143	P17980	P17980	26S protease regulatory subunit 6A	PSMC3	19.1183	19.3615	19.2038	18.8648	19.6505	19.961	19.3152	19.2064	215	2	2	2	7.1	7.1	7.1	49.203	0	15.732	5840300	3	216310	14167	7285.8	26293	15707	40203	46398	22986	43265
	0.370779	-0.407771	P30044	P30044	Peroxiredoxin-5, mitochondrial	PRDX5	19.2919	18.2548	19.7899	20.3006	20.306	19.8462	19.3644	19.7516	269	3	3	3	19.6	19.6	19.6	22.086	0	23.055	5228800	5	402220	8847	0	115380	11101	25044	90740	38363	112740
	0.42274	-0.413847	P32119	P32119	Peroxiredoxin-2	PRDX2	22.3609	23.1297	23.6699	24.0042	23.0801	23.8885	23.6077	24.2438	284	7	6	6	35.4	29.8	29.8	21.892	0	72.483	127520000	37	9809000	254880	353460	1215800	1395600	647800	1785300	1022300	3133900
	0.767786	-0.416785	P46940	P46940	Ras GTPase-activating-like protein IQGAP1	IQGAP1	24.5534	24.9047	25.5436	25.5638	25.3296	25.6984	25.4554	25.7492	336	34	34	34	25	25	25	189.25	0	323.31	428600000	144	5163900	166220	202730	722010	705820	453770	1060600	519770	1333000
	1.0468	-0.42805	Q9P258	Q9P258	Protein RCC2	RCC2	18.6081	19.2767	19.4045	19.455	19.6692	19.803	19.4307	19.5535	738	2	2	2	4.2	4.2	4.2	56.084	0.001497	10.988	6440300	2	238530	5531.7	13019	29465	30083	36326	45065	22281	56758
	1.61631	-0.430017	Q9UQE7	Q9UQE7	Structural maintenance of chromosomes protein 3	SMC3	22.6499	22.3432	22.0677	22.1276	22.6601	22.5997	22.8253	22.8234	763	12	12	12	11.3	11.3	11.3	141.54	0	78.358	57848000	28	889970	67056	36296	83282	81174	89790	167690	99240	265450
	0.329351	-0.431649	P08574	P08574	Cytochrome c1, heme protein, mitochondrial	CYC1	18.6116	20.9984	20.6669	20.7553	20.7202	20.8596	20.5157	20.6634	157	1	1	1	3.7	3.7	3.7	35.422	0.0014749	8.6995	14289000	3	840510	47125	112820	104620	114600	97554	143950	60593	159260
	1.76246	-0.438376	Q14566	Q14566	DNA replication licensing factor MCM6	MCM6	24.2844	23.9591	23.8207	23.7466	24.3835	24.2755	24.3382	24.5672	543	16	16	16	22.3	22.3	22.3	92.888	0	143.78	176140000	79	3669700	249930	225150	429730	233830	466590	702500	430660	931270
	0.364327	-0.481764	P40227	P40227	T-complex protein 1 subunit zeta	CCT6A	20.683	20.4964	20.8906	18.4343	20.5157	20.5084	20.703	20.7042	312	3	3	3	5.3	5.3	5.3	58.024	0	17.159	14819000	4	569980	35350	23581	127430	27499	39680	108700	41864	165880
	0.909954	-0.485655	P10599	P10599	Thioredoxin	TXN	21.1873	21.7757	21.8506	22.0728	22.0049	22.1946	21.8748	22.7548	175	2	2	2	21	21	21	11.737	0	18.712	41182000	10	5883100	159750	298030	669520	820580	735810	1192200	437840	1569400
	0.757912	-0.495303	P68133;P68032;P63267;P62736	P68133;P68032;P63267;P62736	Actin, alpha skeletal muscle;Actin, alpha cardiac muscle 1;Actin, gamma-enteric smooth muscle;Actin, aortic smooth muscle	ACTA1;ACTC1;ACTG2;ACTA2	23.6563	23.2703	23.629	23.0399	24.6998	23.5199	23.46	23.8971	463	12	1	1	31.6	4.2	4.2	42.051	0.0014881	10.07	145870000	16	7293500	695420	363170	962730	496030	1481700	1077100	470420	1747000
	0.846338	-0.502849	P20073	P20073	Annexin A7	ANXA7	20.8808	20.9648	21.6941	21.5405	21.2808	22.2865	21.5868	21.9374	225	4	4	4	9.2	9.2	9.2	52.739	0	36.584	30854000	15	1469200	42913	37416	213440	225070	129890	326690	150600	343190
	0.667247	-0.519005	P31949	P31949	Protein S100-A11;Protein S100-A11, N-terminally processed	S100A11	21.0722	21.4978	21.8431	22.1818	21.6327	22.45	21.7425	22.8457	282	2	2	2	15.2	15.2	15.2	11.74	0	14.198	40353000	10	8070500	368290	484760	1102600	1565900	506770	1251400	542310	2248600
	0.490668	-0.525971	O95292	O95292	Vesicle-associated membrane protein-associated protein B/C	VAPB	19.7139	21.1689	21.6722	21.6957	21.2769	21.9356	21.4226	21.7195	101	3	2	2	17.3	12.3	12.3	27.228	0	14.294	27507000	9	1833800	29153	73922	316170	290100	146550	343400	168720	465780
	1.54314	-0.529187	P17987	P17987	T-complex protein 1 subunit alpha	TCP1	21.4714	21.9551	21.4561	22.0501	22.3643	22.2564	22.4374	21.9912	216	6	6	6	13.1	13.1	13.1	60.343	0	38.806	39083000	15	1260800	105590	45439	128720	131390	197030	179190	167080	306330
	0.39569	-0.541888	Q86X55	Q86X55	Histone-arginine methyltransferase CARM1	CARM1	18.4909	20.7837	18.3227	19.5707	19.327	20.1298	19.7327	20.1461	617	2	2	2	3.6	3.6	3.6	65.853	0	14.351	6614800	5	314990	0	0	26332	45505	30239	74712	40678	97523
	0.477431	-0.546949	P23921	P23921	Ribonucleoside-diphosphate reductase large subunit	RRM1	23.1021	23.7968	24.7218	24.9128	23.9617	25.1451	24.3917	25.2228	245	14	14	14	22.6	22.6	22.6	90.069	0	136.74	249120000	63	5661700	119810	215770	786530	845370	374530	1170500	475470	1673700
	0.455111	-0.554916	O43242	O43242	26S proteasome non-ATPase regulatory subunit 3	PSMD3	18.4021	19.8544	20.5999	20.8078	20.6138	20.3205	20.5354	20.4142	55	3	3	3	6.4	6.4	6.4	60.977	0	17.971	12144000	6	357190	10724	10399	38122	63412	54967	62380	41318	75870
	1.68423	-0.557027	Q13185	Q13185	Chromobox protein homolog 3	CBX3	19.8314	20.3974	20.1003	20.0528	20.3887	20.6483	20.5465	21.0265	522	2	2	2	13.7	13.7	13.7	20.811	0	13.838	12390000	2	1770100	0	120380	163510	143410	203680	414420	217100	507580
	0.706082	-0.567917	P84095	P84095	Rho-related GTP-binding protein RhoG	RHOG	19.022	19.9823	18.3062	19.7846	19.6149	19.9058	19.8741	19.972	475	2	2	2	14.7	14.7	14.7	21.308	0.0016393	11.733	6760100	2	614560	27105	60874	59457	88769	0	129120	76022	173210
	0.510623	-0.57133	Q15005	Q15005	Signal peptidase complex subunit 2	SPCS2	18.5868	20.4152	20.4098	20.9075	20.7132	20.7447	20.5186	20.6281	552	3	3	3	12.4	12.4	12.4	25.003	0	19.714	13422000	14	1118500	22821	64437	136400	167540	171710	154640	147000	253990
	0.732956	-0.580983	P17812	P17812	CTP synthase 1	CTPS1	19.3642	18.6734	18.5137	19.7381	18.8758	19.9326	19.9144	19.8906	213	2	2	2	4.9	4.9	4.9	66.69	0	13.584	6342600	3	211420	0	0	21714	31236	17857	47623	30064	62925
	0.824835	-0.583879	P27708	P27708	CAD protein;Glutamine-dependent carbamoyl-phosphate synthase;Aspartate carbamoyltransferase;Dihydroorotase	CAD	19.2168	18.0176	19.6592	18.9123	19.4	19.6142	19.683	19.4443	261	3	3	3	1.4	1.4	1.4	242.98	0	16.626	4670100	3	45341	980.98	3315.2	3133.2	2553.5	3958.8	10814	7324.9	13260
	2.604	-0.594226	Q9BQE3;P68363;Q71U36;P0DPH8;P0DPH7;Q6PEY2;Q9NY65;Q9H853	Q9BQE3;P68363;Q71U36;P0DPH8;P0DPH7;Q6PEY2;Q9NY65	Tubulin alpha-1C chain;Tubulin alpha-1B chain;Tubulin alpha-1A chain;Tubulin alpha-3E chain;Tubulin alpha-8 chain	TUBA1C;TUBA1B;TUBA1A;TUBA3E;TUBA8	25.0592	25.4171	25.364	25.5761	25.8489	26.0865	25.9429	25.915	465	12	12	4	39.2	39.2	12	49.895	0	255.79	508180000	108	24199000	1066000	1180600	2409900	2712400	3128200	5138200	2647800	5915900
	1.52265	-0.605841	Q9UGP8	Q9UGP8	Translocation protein SEC63 homolog	SEC63	19.2911	19.3075	18.9478	19.6799	20.1862	19.6761	19.6193	20.1682	746	2	2	2	2.8	2.8	2.8	87.996	0.0016155	11.589	6204500	4	163280	11007	9798.7	7254.2	29501	0	33175	19971	52570
	0.891694	-0.613457	P07814	P07814	Bifunctional glutamate/proline--tRNA ligase;Glutamate--tRNA ligase;Proline--tRNA ligase	EPRS	22.5969	20.9733	22.0086	22.076	22.4247	22.4745	22.7476	22.4618	150	8	8	8	6.2	6.2	6.2	170.59	0	80.587	47707000	24	581790	52383	14119	57977	61288	78891	120450	69346	127340
	2.20494	-0.615427	O14936	O14936	Peripheral plasma membrane protein CASK	CASK	18.8109	18.8415	18.8939	19.18	19.2367	19.6792	19.4737	19.7984	40	2	2	2	2.2	2.2	2.2	105.12	0.0016584	11.858	5254600	2	107240	0	0	11898	9530.7	10768	28388	13055	33597
	0.685354	-0.615606	Q6P2Q9	Q6P2Q9	Pre-mRNA-processing-splicing factor 8	PRPF8	20.3009	18.4786	19.7623	19.6149	19.7376	20.1786	19.9952	20.7077	599	6	6	6	2.9	2.9	2.9	273.6	0	34.143	9445300	6	74373	0	663.72	4562.7	3547.4	3646.9	17583	8245.3	36124
	1.03526	-0.616489	Q96AG4	Q96AG4	Leucine-rich repeat-containing protein 59	LRRC59	21.4649	21.9257	22.4534	22.2149	22.2973	23.1318	22.2166	22.8791	670	4	4	4	18.2	18.2	18.2	34.93	0	27.061	52912000	16	3779400	279750	76366	603620	308680	316290	1060500	407330	726890
	0.383312	-0.618933	P62847	P62847	40S ribosomal protein S24	RPS24	20.8754	20.7901	18.7042	18.8429	21.171	19.3916	20.7163	20.4095	443	2	2	2	20.3	20.3	20.3	15.423	0	12.696	10809000	6	1801400	270340	196860	98186	73560	363560	179840	257130	361950
	0.247406	-0.619156	Q9Y6Y8	Q9Y6Y8	SEC23-interacting protein	SEC23IP	17.5232	18.9856	21.0351	21.5736	19.2278	20.8139	20.5362	21.0162	789	4	4	4	4.2	4.2	4.2	111.08	0	25.686	15092000	14	377290	0	7861.5	67538	85263	15004	69087	33865	98674
	0.422128	-0.6357	Q9BTV4	Q9BTV4	Transmembrane protein 43	TMEM43	19.3478	19.017	20.6896	19.0987	20.3538	20.9597	18.5913	20.7911	691	2	2	2	10.8	10.8	10.8	44.875	0	12.377	13842000	5	601840	44438	46536	62311	78564	57966	127820	35880	148320
	1.70547	-0.64495	O60884	O60884	DnaJ homolog subfamily A member 2	DNAJA2	20.2328	20.0095	20.4201	20.649	20.816	20.7964	20.8493	21.4296	78	3	3	3	6.8	6.8	6.8	45.745	0	17.331	16934000	3	769730	10915	86757	159010	29697	177570	45779	93135	166860
	0.401415	-0.655575	O75694	O75694	Nuclear pore complex protein Nup155	NUP155	19.6399	22.1734	22.5815	22.6799	22.4432	22.355	22.402	22.4968	93	8	8	8	7.4	7.4	7.4	155.2	0	62.426	50196000	23	880640	20297	43189	111430	143120	83544	154420	90314	234340
	1.90205	-0.657218	P50402	P50402	Emerin	EMD	22.0668	22.5519	22.761	22.5283	22.8787	23.0508	23.178	23.4294	350	7	7	7	35.4	35.4	35.4	28.994	0	64.087	74947000	31	6245600	228580	234280	525770	681060	553170	1176400	777260	2069100
	1.88358	-0.657258	P19338	P19338	Nucleolin	NCL	21.8537	22.6464	22.3919	22.4358	22.9405	23.2197	22.8177	22.979	222	11	11	11	15.9	15.9	15.9	76.613	0	73.6	64241000	28	1835500	66131	139260	123470	120790	230760	463680	204930	486440
	0.951523	-0.660872	P47897	P47897	Glutamine--tRNA ligase	QARS	20.2062	21.7395	21.5898	20.8669	21.8203	21.7733	21.7608	21.6914	340	7	7	7	9.5	9.5	9.5	87.798	0	42.405	27840000	14	618660	18657	34962	65580	39041	70413	127320	102310	160380
	0.922495	-0.663373	Q99729	Q99729	Heterogeneous nuclear ribonucleoprotein A/B	HNRNPAB	19.2881	18.8566	19.1234	19.2556	19.0018	19.8441	19.6261	20.7051	687	2	2	2	6.3	6.3	6.3	36.224	0	12.584	7334200	2	564170	5836.7	15584	47704	52009	30799	151590	66560	194090
	1.13014	-0.664375	Q15365	Q15365	Poly(rC)-binding protein 1	PCBP1	20.8688	20.9642	21.8205	21.7593	21.7919	22.3409	21.6478	22.2896	563	3	3	3	9.3	9.3	9.3	37.497	0	21.084	33983000	9	1999000	76238	94093	234650	284590	238090	397200	179150	495000
	0.424298	-0.670313	Q13151	Q13151	Heterogeneous nuclear ribonucleoprotein A0	HNRNPA0	20.025	22.3036	22.8004	23.0075	22.2829	22.9674	22.7194	22.848	520	4	4	4	21	21	21	30.84	0	34.721	62211000	13	4785500	175350	227700	798300	657770	256440	973450	494780	1201700
	2.64061	-0.674335	P11940;Q9H361;Q4VXU2;Q13310;Q5JQF8	P11940;Q9H361	Polyadenylate-binding protein 1;Polyadenylate-binding protein 3	PABPC1;PABPC3	22.6873	22.4143	22.8392	22.9103	23.3163	23.5115	23.2093	23.5114	189	10	10	10	17	17	17	70.67	0	70.569	85839000	24	2384400	127850	76274	242260	231870	254590	523210	302120	626240
	0.571161	-0.6762	O43175	O43175	D-3-phosphoglycerate dehydrogenase	PHGDH	22.0772	22.5608	23.7245	23.9577	22.8302	24.1071	23.8403	24.2474	54	8	8	8	16.7	16.7	16.7	56.65	0	119.06	127060000	36	5294000	98522	176990	866740	784420	309440	1075100	468000	1514800
	0.482214	-0.682937	Q12788	Q12788	Transducin beta-like protein 3	TBL3	20.1264	17.7848	18.7303	18.4727	18.4237	19.5562	19.4137	20.4523	512	3	3	3	4.7	4.7	4.7	89.034	0	19.352	5905800	4	131240	2104.5	2356.2	8058.5	5226.5	8072.4	37379	14762	53279
	1.56605	-0.695912	P31689	P31689	DnaJ homolog subfamily A member 1	DNAJA1	21.4746	21.6956	22.0437	22.3712	22.3143	22.661	22.4524	22.9411	277	6	6	6	22.7	22.7	22.7	44.868	0	44.994	51380000	24	2446700	77971	85751	235600	231920	279560	517220	268080	750570
	0.45709	-0.6987	P61221	P61221	ATP-binding cassette sub-family E member 1	ABCE1	19.302	18.4173	18.0698	19.7879	18.0012	20.6588	19.8337	19.878	406	2	2	2	5.3	5.3	5.3	67.314	0	13.009	5947600	3	198250	0	0	13042	0	17837	74729	28370	64274
+	5.29338	-0.699054	Q08J23	Q08J23	tRNA (cytosine(34)-C(5))-methyltransferase	NSUN2	23.0754	23.0799	22.9725	23.0862	23.6791	23.7227	23.8537	23.7549	507	15	15	15	28.4	28.4	28.4	86.47	0	117.83	106820000	49	2427800	144750	139100	253280	213600	229750	444180	308970	694150
	0.363654	-0.707373	P62906	P62906	60S ribosomal protein L10a	RPL10A	21.6068	21.9406	18.4943	19.4123	21.0342	21.0666	21.2738	20.9087	449	2	2	2	9.2	9.2	9.2	24.831	0	12.275	17616000	11	1761600	258720	276600	96163	108860	171330	259090	224430	366450
	0.294779	-0.710253	P51858;Q9Y3E1;O75475;Q7Z4V5	P51858	Hepatoma-derived growth factor	HDGF	18.9496	18.8835	18.8729	18.9749	20.3429	20.6546	16.6282	20.8962	365	3	3	3	13.8	13.8	13.8	26.788	0	16.914	10921000	3	642380	0	0	19438	106310	65896	123960	66809	259980
+	3.49403	-0.713793	O00571;O15523;Q9NQI0	O00571;O15523	ATP-dependent RNA helicase DDX3X;ATP-dependent RNA helicase DDX3Y	DDX3X;DDX3Y	24.6813	24.6853	24.6948	24.8269	25.2463	25.605	25.3173	25.5749	30	19	19	18	30.5	30.5	28.9	73.243	0	286.61	353080000	125	9053400	427270	379310	745050	931350	1124200	1866600	1003800	2575800
	0.532658	-0.716228	P20042	P20042	Eukaryotic translation initiation factor 2 subunit 2	EIF2S2	21.7965	20.9799	19.0061	21.231	21.3112	21.5941	21.186	21.787	224	6	6	6	21.3	21.3	21.3	38.388	0	39.715	25601000	9	1280000	98323	56462	60430	113820	131280	275740	100890	443080
	1.31396	-0.723172	Q16531	Q16531	DNA damage-binding protein 1	DDB1	19.2124	20.5324	19.6286	19.8376	20.4527	20.4797	20.3591	20.8121	573	6	6	6	5	5	5	126.97	0	34.213	9505300	7	172820	0	0	7152.1	0	15891	40569	14131	95081
	1.75797	-0.72329	P37802	P37802	Transgelin-2	TAGLN2	21.9771	22.1805	22.78	22.5415	23.07	23.2124	22.7391	23.3507	305	7	7	7	42.7	42.7	42.7	22.391	0	59.34	68768000	24	5289900	281040	305020	644200	731490	484310	949700	481840	1412300
	0.983496	-0.74202	P50995;P27216	P50995	Annexin A11	ANXA11	21.9359	22.0777	23.1548	23.1468	22.8212	23.687	23.1768	23.5983	355	9	9	9	19.4	19.4	19.4	54.389	0	58.124	89081000	26	4688500	128230	135590	494720	526520	379690	1139300	422770	1461700
+	2.45722	-0.747817	P63244	P63244	Guanine nucleotide-binding protein subunit beta-2-like 1;Guanine nucleotide-binding protein subunit beta-2-like 1, N-terminally processed	GNB2L1	23.9074	24.175	23.594	23.4763	24.5185	24.4624	24.6055	24.5576	459	9	9	9	32.2	32.2	32.2	35.076	0	87.674	184640000	56	9232200	517040	483550	834490	423580	1137800	1816900	1207200	2811600
+	3.39501	-0.775823	P31943;P55795	P31943	Heterogeneous nuclear ribonucleoprotein H;Heterogeneous nuclear ribonucleoprotein H, N-terminally processed	HNRNPH1	23.8801	23.931	24.1994	24.205	24.7818	24.9514	24.6595	24.9262	279	8	8	6	29.2	29.2	23.2	49.229	0	258.88	223870000	67	12437000	630010	616740	1240300	1238100	1654500	2511500	1245900	3300100
	0.665339	-0.781694	P20700	P20700	Lamin-B1	LMNB1	19.1294	21.1862	21.2583	21.5468	21.3762	21.6864	21.3942	21.7907	229	5	4	4	9.7	8.4	8.4	66.408	0	44.875	25284000	13	722410	12932	39869	94990	107990	71368	133830	69542	191890
	1.27525	-0.789222	P04075	P04075	Fructose-bisphosphate aldolase A	ALDOA	23.0123	23.5974	24.0827	24.1495	23.939	24.8123	24.5243	24.7232	121	12	12	12	45.1	45.1	45.1	39.42	0	196.84	189670000	76	8246500	266450	310080	747190	1020300	665920	1958200	1009300	2269000
	1.21719	-0.793395	P26358	P26358	DNA (cytosine-5)-methyltransferase 1	DNMT1	19.3676	19.0415	18.7422	19.9297	19.3688	20.2598	20.3199	20.306	252	4	4	4	2.2	2.2	2.2	183.16	0	22.822	6203800	5	81629	0	0	0	0	0	13236	8840.7	59552
+	2.56693	-0.802625	P68366	P68366	Tubulin alpha-4A chain	TUBA4A	20.2293	20.3412	20.4896	20.3638	21.0472	21.4739	20.7781	21.3351	466	10	2	2	32.8	5.6	5.6	49.924	0	25.174	17711000	15	843390	43843	38556	88378	74095	101360	196370	85312	215480
+	2.07147	-0.81421	O43707	O43707	Alpha-actinin-4	ACTN4	24.5515	25.0258	25.2168	25.2277	25.5427	26.0106	25.6177	26.1076	60	30	30	18	37.1	37.1	23.3	104.85	0	323.31	459340000	177	8351700	267070	376070	819140	818920	934270	1832800	868030	2435400
	0.624552	-0.817689	Q86V81	Q86V81	THO complex subunit 4	ALYREF	18.3468	20.1945	19.1684	18.6843	18.4904	20.3451	20.451	20.3782	616	2	2	2	15.2	15.2	15.2	26.888	0	12.491	5759300	2	443020	0	0	0	0	0	143450	96987	202590
	1.09646	-0.818121	Q12904	Q12904	Aminoacyl tRNA synthase complex-interacting multifunctional protein 1;Endothelial monocyte-activating polypeptide 2	AIMP1	20.1778	19.014	20.6595	20.6324	20.7864	20.9683	21.0404	20.9611	515	3	3	3	15.7	15.7	15.7	34.352	0	25.607	15010000	6	882920	23598	0	82192	76575	91471	183900	144520	280670
	0.281849	-0.818465	P53992	P53992	Protein transport protein Sec24C	SEC24C	18.1269	22.5039	23.0903	23.0636	22.394	22.7947	22.1744	22.6954	379	8	8	8	9.3	9.3	9.3	118.32	0	58.402	58604000	35	1465100	11817	61609	275850	269080	141490	277360	120340	307570
+	1.94395	-0.831801	P62269	P62269	40S ribosomal protein S18	RPS18	20.8783	20.7243	20.8993	20.8386	21.2407	21.8005	21.3771	22.2493	427	4	4	4	23.7	23.7	23.7	17.718	0	23.335	25199000	5	2799900	198300	126880	203370	130080	358320	607870	342980	832060
	0.941774	-0.838595	P20810	P20810	Calpastatin	CAST	19.3804	20.2607	21.4881	20.7901	21.1146	21.5036	21.2063	21.4492	230	5	5	5	10.2	10.2	10.2	76.572	0	61.093	21216000	12	642910	4606.3	12003	76796	57590	51396	142150	97409	200960
+	2.36968	-0.841578	P02545;Q03252	P02545	Prelamin-A/C;Lamin-A/C	LMNA	24.3299	24.3863	24.9587	24.9514	25.3424	25.5629	25.4093	25.6781	119	25	25	24	44.9	44.9	43.7	74.139	0	296.54	378920000	120	9241900	244390	233200	843670	919450	1049700	1937700	1010000	3003700
+	5.08769	-0.848705	P15311;P35241	P15311	Ezrin	EZR	22.2211	22.3099	22.3532	22.1908	23.1858	23.1668	22.9789	23.1384	204	6	6	4	10.2	10.2	7.5	69.412	0	48.772	67834000	31	2119800	73771	77990	166440	172490	368840	448810	237580	573890
+	2.07966	-0.849784	P42167	P42167	Lamina-associated polypeptide 2, isoforms beta/gamma;Thymopoietin;Thymopentin	TMPO	21.7766	21.9935	22.3911	22.3186	22.5636	23.123	22.8582	23.334	316	8	8	3	21.4	21.4	5.5	50.67	0	71.69	65905000	34	2995700	71370	60770	287990	284870	319710	628060	351050	991870
	1.29439	-0.851147	P35637	P35637	RNA-binding protein FUS	FUS	23.5209	24.3323	24.8903	24.9185	25.0087	25.4885	25.107	25.4624	299	6	6	4	14.6	14.6	12.9	53.425	0	129.15	320560000	50	24659000	614600	829460	2799300	2788500	2532500	5644400	2509600	6940300
	0.766891	-0.874383	P60953	P60953	Cell division control protein 42 homolog	CDC42	19.059	18.7609	20.4064	19.0674	20.9809	20.4931	18.9916	20.3258	397	2	2	2	15.7	15.7	15.7	21.258	0	18.102	10044000	6	1116000	14679	0	200730	52651	199700	250250	107540	290440
+	1.33245	-0.881732	P55072	P55072	Transitional endoplasmic reticulum ATPase	VCP	24.666	25.2803	26.0229	26.0008	26.0171	26.5756	26.3032	26.601	384	24	24	24	35.2	35.2	35.2	89.321	0	323.31	696830000	182	15485000	402230	495420	1846600	1825800	1400300	3399100	1631500	4484100
	0.544633	-0.896024	P27635;Q96L21	P27635;Q96L21	60S ribosomal protein L10;60S ribosomal protein L10-like	RPL10;RPL10L	22.3095	22.3154	21.9279	19.1699	22.2077	22.1464	22.4844	22.4683	259	2	2	2	9.3	9.3	9.3	24.604	0	13.628	41290000	11	5161300	489520	475590	517490	382700	580410	769230	700900	1245400
	0.706519	-0.901606	Q9NS69	Q9NS69	Mitochondrial import receptor subunit TOM22 homolog	TOMM22	19.1937	19.681	21.5022	21.3556	21.7573	20.9557	21.6323	20.9936	722	2	2	2	32.4	32.4	32.4	15.521	0	31.552	23131000	15	3304500	313000	146010	503620	433450	520550	417250	410110	560480
+	2.87771	-0.911385	P21333	P21333	Filamin-A	FLNA	27.5386	27.917	28.1582	28.1151	28.6355	28.9569	28.8119	28.9701	233	82	82	72	43.4	43.4	39.4	280.74	0	323.31	3607500000	802	26921000	1053400	1080600	2766800	2561200	3006400	5834400	3076800	7541800
	0.510476	-0.921986	Q969X5	Q969X5	Endoplasmic reticulum-Golgi intermediate compartment protein 1	ERGIC1	21.7359	19.2285	21.7021	18.5561	21.1386	21.2503	21.3654	21.1562	667	4	4	4	19	19	19	32.592	0	23.8	23487000	10	1957300	178540	160030	411070	161530	177910	363730	194080	310360
	0.733022	-0.943918	P60468	P60468	Protein transport protein Sec61 subunit beta	SEC61B	19.6475	21.7384	21.8805	22.5248	22.2475	22.3679	22.3028	22.6487	391	2	2	2	26	26	26	9.9743	0	24.072	43248000	12	7208000	83471	400160	859630	1188700	874100	1195500	702300	1904200
+	1.44337	-0.974324	Q9Y2L1	Q9Y2L1	Exosome complex exonuclease RRP44	DIS3	19.604	18.5615	18.5178	19.2144	19.2206	20.3296	20.0717	20.1732	772	4	4	4	4.4	4.4	4.4	109	0	23.282	6946500	6	144720	4844.3	5902.6	11735	8894.7	5030.9	42618	17314	48379
+	2.18965	-0.983285	O43143	O43143	Pre-mRNA-splicing factor ATP-dependent RNA helicase DHX15	DHX15	19.9414	19.3065	19.3198	19.8399	21.0278	20.2402	20.6718	20.4009	51	4	4	4	6.3	6.3	6.3	90.932	0	24.093	9008100	5	230980	0	3791.3	0	12424	36417	50902	42051	85391
+	1.57108	-1.00385	P35659	P35659	Protein DEK	DEK	19.8284	20.7051	19.6514	19.0473	20.8139	20.7271	20.8022	20.9046	300	3	3	3	9.1	9.1	9.1	42.674	0	21.025	13196000	4	628380	24231	39407	27469	23341	81723	96199	66271	269740
+	2.99963	-1.00781	Q9H2U1	Q9H2U1	ATP-dependent RNA helicase DHX36	DHX36	19.0031	18.4166	18.9848	19.0117	19.8597	20.0823	19.6649	19.8405	705	2	2	2	3.1	3.1	3.1	114.76	0.001642	11.742	5508900	3	114770	0	0	7373.7	6101.3	14776	33310	14136	39072
+	3.2676	-1.01986	Q13263	Q13263	Transcription intermediary factor 1-beta	TRIM28	22.2134	21.7542	21.6702	21.5456	22.8075	22.8937	22.6925	22.869	524	5	5	5	10.8	10.8	10.8	88.549	0	86.389	54846000	31	1713900	58073	46266	140270	80922	230360	405920	220590	531550
+	1.3865	-1.0226	Q07157	Q07157	Tight junction protein ZO-1	TJP1	18.3973	19.8804	20.1493	19.3142	20.6673	20.3395	20.3627	20.4621	502	5	5	5	3.5	3.5	3.5	195.46	0	28.445	9843700	5	108170	0	0	6043.2	4055.9	18944	27609	9646.7	41875
+	3.93196	-1.02333	P67936;CON__Q3SX28;P07951;P09493	P67936	Tropomyosin alpha-4 chain	TPM4	22.5203	22.7204	22.6759	22.8771	23.517	23.942	23.7682	23.6599	462	6	6	5	25	25	21	28.521	0	100.43	101180000	34	6745100	173110	132100	524890	636000	947900	1513500	987660	1830000
+	1.63457	-1.02438	P51571	P51571	Translocon-associated protein subunit delta	SSR4	18.9783	18.6381	18.9911	19.7876	19.4723	20.4096	20.5172	20.0935	362	3	3	3	23.1	23.1	23.1	18.998	0	19.786	9945700	10	1420800	149080	58977	142340	85924	198210	411230	144010	231050
+	4.12291	-1.0326	P26641	P26641	Elongation factor 1-gamma	EEF1G	22.1837	22.0116	22.2956	22.4258	23.0759	23.3307	23.3498	23.2907	256	8	8	8	20.1	20.1	20.1	50.118	0	105.6	73188000	38	3049500	126380	74569	180510	174700	484620	720160	397830	890750
+	4.97239	-1.03633	Q00839	Q00839	Heterogeneous nuclear ribonucleoprotein U	HNRNPU	24.4892	24.7207	24.5733	24.6259	25.4822	25.6763	25.6254	25.7706	481	11	11	11	15.9	15.9	15.9	90.583	0	297.05	383990000	126	10378000	413070	374940	831870	794400	1249600	2332700	1267300	3114200
+	2.14836	-1.04292	P09651;Q32P51	P09651;Q32P51	Heterogeneous nuclear ribonucleoprotein A1;Heterogeneous nuclear ribonucleoprotein A1, N-terminally processed;Heterogeneous nuclear ribonucleoprotein A1-like 2	HNRNPA1;HNRNPA1L2	23.0883	23.4514	24.0444	24.0079	24.4419	24.8797	24.5246	24.9173	165	8	8	8	30.6	30.6	30.6	38.746	0	141.06	210760000	53	11709000	256710	402160	1276300	1153000	1295500	2922700	1268700	3134000
+	1.19387	-1.05089	O60684;O15131	O60684;O15131	Importin subunit alpha-7;Importin subunit alpha-6	KPNA6;KPNA5	19.0129	18.6888	18.5014	19.1907	18.5991	20.2969	20.2203	20.481	74	2	2	2	6.2	6.2	6.2	60.029	0	23.576	7841700	5	340940	10731	12692	20854	20670	30627	79985	48407	116980
	0.618433	-1.05138	Q9Y265	Q9Y265	RuvB-like 1	RUVBL1	19.0929	18.8917	21.386	21.2576	19.9355	21.991	21.3527	21.5544	767	5	5	5	16.2	16.2	16.2	50.227	0	37.695	22228000	10	1010400	14588	39533	143850	137530	43522	266270	118760	246310
+	1.49308	-1.06071	P00492	P00492	Hypoxanthine-guanine phosphoribosyltransferase	HPRT1	19.0122	20.0389	20.2723	18.8804	20.473	20.5559	20.3837	21.034	114	2	2	2	11.9	11.9	11.9	24.579	0	13.262	11124000	7	855720	14373	41037	121560	44458	52063	197250	97334	287650
+	1.47913	-1.06486	P09211	P09211	Glutathione S-transferase P	GSTP1	19.6737	19.082	19.0855	18.8469	19.2097	20.6754	20.4969	20.5655	162	2	2	2	16.2	16.2	16.2	23.356	0	25.936	7275200	3	661390	0	0	0	53309	0	245220	106300	256560
+	2.51908	-1.07083	P17844	P17844	Probable ATP-dependent RNA helicase DDX5	DDX5	24.2753	24.6411	24.9302	25.0406	25.4204	25.8757	25.7624	26.112	214	16	15	13	30.6	28.8	25.6	69.147	0	191.64	432400000	121	13512000	398990	458440	1202500	1174300	1454300	2828500	1631000	4364400
+	2.85867	-1.07162	Q9P2E9	Q9P2E9	Ribosome-binding protein 1	RRBP1	20.9401	21.0515	21.4414	21.3609	21.9984	22.3815	22.0612	22.6392	739	10	10	10	8.7	8.7	8.7	152.45	0	61.783	38977000	19	410280	4387.9	5515.6	42173	21979	36265	96810	63364	139790
+	1.94237	-1.0827	Q9ULV4	Q9ULV4	Coronin-1C	CORO1C	20.9645	21.2293	21.216	21.3067	21.7383	22.7324	21.7762	22.8005	756	4	4	4	7.6	7.6	7.6	53.248	0	23.683	38336000	9	2017700	82435	88753	173330	180860	189380	465020	181870	656060
+	2.65218	-1.08731	Q00341	Q00341	Vigilin	HDLBP	21.5429	22.0759	22.1049	22.0595	22.5777	23.3522	23.0303	23.1722	479	12	12	12	10.9	10.9	10.9	141.45	0	182.82	64617000	23	979050	10314	24400	64498	66038	146760	232800	121550	312690
+	1.84753	-1.09049	P13010	P13010	X-ray repair cross-complementing protein 5	XRCC5	20.5528	20.6341	20.3472	20.2997	20.8405	21.6862	21.3542	22.3149	196	4	4	4	7.4	7.4	7.4	82.704	0	23.872	23843000	9	627450	26680	25768	29099	36273	38354	155400	82913	232960
+	1.42206	-1.09088	O95373	O95373	Importin-7	IPO7	19.321	20.5056	20.7587	20.9036	20.9481	21.7602	21.3531	21.791	103	5	5	5	5.5	5.5	5.5	119.52	0	45.375	21552000	10	513150	0	12197	42337	47920	58577	139770	68921	143430
+	1.69906	-1.10038	Q92841	Q92841	Probable ATP-dependent RNA helicase DDX17	DDX17	21.9668	22.1406	22.646	23.2116	23.1168	23.8998	23.3621	23.988	656	12	9	9	17.7	13.4	13.4	80.272	0	79.472	99775000	44	2696600	37674	45226	250670	290620	254020	635570	290670	892170
+	1.31927	-1.10491	P53396	P53396	ATP-citrate synthase	ACLY	21.5025	21.1926	22.5017	22.5316	22.392	23.5426	22.7263	23.4871	374	11	11	11	11.7	11.7	11.7	120.84	0	101.41	67651000	39	1146600	10182	10383	136970	183470	105090	214400	158410	327710
+	2.64433	-1.11092	Q99873;Q9NR22	Q99873;Q9NR22	Protein arginine N-methyltransferase 1;Protein arginine N-methyltransferase 8	PRMT1;PRMT8	19.1172	18.807	19.3543	19.3579	20.4138	20.182	19.8293	20.6549	688	2	2	2	5.9	5.9	5.9	42.461	0	14.449	7865200	9	374530	9288	0	29527	32873	26653	112430	41777	121990
	0.703089	-1.11402	Q9Y224	Q9Y224	UPF0568 protein C14orf166	C14orf166	18.7423	19.255	20.7391	21.0813	19.53	21.5882	21.3376	21.8178	764	4	4	4	20.1	20.1	20.1	28.068	0	39.542	19827000	11	1239200	10729	0	135120	69584	43566	313390	161230	505580
+	1.59218	-1.11423	Q8TEQ6	Q8TEQ6	Gem-associated protein 5	GEMIN5	19.6239	19.5864	20.7623	20.9732	21.2101	21.2593	21.3279	21.6054	641	7	7	7	5.4	5.4	5.4	168.59	0	45.853	19722000	9	243480	1095.6	3715.5	9718.2	22190	24308	55551	37287	89619
+	2.61186	-1.12036	Q8WWI1	Q8WWI1	LIM domain only protein 7	LMO7	20.3764	20.4259	20.401	20.6808	21.5292	21.3772	21.2532	22.206	647	8	8	8	6.2	6.2	6.2	192.69	0	54.318	25119000	12	261660	4820.6	4300.9	8032.4	10068	29734	70329	29933	104440
+	1.69672	-1.125	P22626	P22626	Heterogeneous nuclear ribonucleoproteins A2/B1	HNRNPA2B1	24.3428	24.6532	25.3489	25.5305	25.5564	26.4522	25.9032	26.4635	239	12	12	12	42.8	42.8	42.8	37.429	0	208.23	556540000	145	27827000	601060	676210	2140600	2301300	2900800	6709500	3107100	9390400
+	1.76164	-1.13613	Q29RF7;Q9NTI5	Q29RF7	Sister chromatid cohesion protein PDS5 homolog A	PDS5A	20.2771	19.3591	20.6175	20.5071	20.8744	21.2332	21.3564	21.8412	580	7	7	7	6.5	6.5	6.5	150.83	0	42.459	19772000	9	263620	4217.6	0	12658	18665	33544	64885	37672	91979
+	2.04764	-1.13844	P47712	P47712	Cytosolic phospholipase A2;Phospholipase A2;Lysophospholipase	PLA2G4A	19.571	19.09	19.7043	18.4134	20.1905	20.253	20.4087	20.4802	338	2	2	2	2.4	2.4	2.4	85.238	0.0016129	11.588	8531100	4	250910	5348.5	4905.4	15854	17517	32300	52239	36549	86200
+	1.25847	-1.14443	P22314	P22314	Ubiquitin-like modifier-activating enzyme 1	UBA1	19.2154	19.373	20.9583	20.8576	21.0745	21.22	21.1032	21.5843	238	6	6	6	9.2	9.2	9.2	117.85	0	41.651	19022000	6	352260	0	0	30225	31766	28619	99489	37000	125160
+	3.58676	-1.14585	O75369	O75369	Filamin-B	FLNB	25.612	25.9791	26.1062	26.1338	26.9303	27.2403	26.9698	27.274	85	69	61	59	33.9	31.1	30.1	278.16	0	323.31	1052300000	341	7410200	202410	207990	606340	600980	915610	1747900	862820	2266200
+	1.03898	-1.14907	P13797;Q14651	P13797	Plastin-3	PLS3	19.521	20.1081	21.3122	18.979	20.3229	21.4003	21.2244	21.569	198	5	5	5	10.3	10.3	10.3	70.81	0	31.822	18652000	8	504100	13957	13037	62284	26788	23873	131420	47772	184980
+	2.78198	-1.16514	P06753	P06753	Tropomyosin alpha-3 chain	TPM3	22.2124	22.3558	22.4875	22.6282	23.0076	23.8736	23.6977	23.7655	144	4	3	3	14.7	11.2	11.2	32.95	0	59.986	90079000	13	5630000	216130	224550	487050	538800	608430	1241200	673030	1640700
+	0.73499	-1.18421	P52907;P47755	P52907	F-actin-capping protein subunit alpha-1	CAPZA1	18.5005	19.0896	21.5302	21.3936	21.663	21.1562	21.144	21.2875	372	3	3	3	16.8	16.8	16.8	32.922	0	21.274	21793000	11	1676400	61151	35244	238340	197010	275780	289500	168740	410620
+	1.38579	-1.20223	P27694	P27694	Replication protein A 70 kDa DNA-binding subunit;Replication protein A 70 kDa DNA-binding subunit, N-terminally processed	RPA1	20.2054	20.7164	19.1436	19.5092	21.0777	21.0485	20.3892	21.8681	260	3	3	3	6	6	6	68.137	0	30.89	17491000	6	583030	36221	30850	14922	13862	78982	125330	36285	246580
+	2.62955	-1.20299	Q96AE4;Q96I24	Q96AE4	Far upstream element-binding protein 1	FUBP1	21.1003	20.9646	20.8193	21.4083	22.1793	22.606	21.7425	22.5766	669	8	6	6	12.1	9.8	9.8	67.56	0	38.269	37381000	18	1246000	27364	29099	105300	110010	154510	311290	140960	367490
+	2.73643	-1.21035	P25205	P25205	DNA replication licensing factor MCM3	MCM3	21.6386	21.856	21.891	21.9759	22.7884	23.3761	22.5788	23.4596	248	14	14	14	22.9	22.9	22.9	90.98	0	106.06	64810000	25	1270800	29556	16583	59432	63224	180720	318630	176010	426620
+	1.82395	-1.21256	P22234	P22234	Multifunctional protein ADE2;Phosphoribosylaminoimidazole-succinocarboxamide synthase;Phosphoribosylaminoimidazole carboxylase	PAICS	18.906	19.5489	19.5535	20.1645	20.2948	21.4724	20.6141	20.6418	237	3	3	3	8.2	8.2	8.2	47.079	0	25.574	13004000	3	684400	0	13342	40991	28367	45594	229810	61611	264680
+	2.67132	-1.21361	P55884	P55884	Eukaryotic translation initiation factor 3 subunit B	EIF3B	18.7163	19.2813	19.205	19.6005	20.0646	20.4845	20.3295	20.779	387	4	4	4	5.4	5.4	5.4	92.48	0	26.529	8890300	5	246950	12266	4206.2	8772.6	0	17346	59331	36690	108340
+	2.06048	-1.21769	P61978	P61978	Heterogeneous nuclear ribonucleoprotein K	HNRNPK	23.521	23.808	24.583	24.6592	25.1969	25.6755	25.0408	25.5287	417	10	10	10	30.9	30.9	30.9	50.976	0	268.34	315710000	98	13727000	304660	369700	1311300	1251100	1874400	3325000	1358300	3932300
+	0.879932	-1.22698	P67812	P67812	Signal peptidase complex catalytic subunit SEC11A	SEC11A	18.2819	19.7145	18.5785	20.9713	19.6273	20.6481	20.9815	21.1972	461	4	4	4	19.6	19.6	19.6	20.625	0	23.475	13889000	6	1388900	43975	30379	112040	207360	40480	250630	147720	556350
+	1.00692	-1.22973	Q5JNZ5;P62854	Q5JNZ5;P62854	Putative 40S ribosomal protein S26-like 1;40S ribosomal protein S26	RPS26P11;RPS26	19.3579	19.1728	20.7124	19.2909	21.2034	20.9484	21.8685	19.4326	445	2	2	2	13.9	13.9	13.9	13.002	0.0015385	11.264	17505000	14	3500900	427500	370490	503290	97023	464610	569950	632440	435610
+	1.59692	-1.23411	O14979	O14979	Heterogeneous nuclear ribonucleoprotein D-like	HNRNPDL	21.4092	21.281	22.3632	22.7741	22.7661	23.511	22.9206	23.5663	41	4	4	3	12.1	12.1	10.2	46.437	0	44.419	72949000	20	3647500	93458	78581	350380	346940	403700	874140	350150	1150100
+	2.54893	-1.24388	P13639	P13639	Elongation factor 2	EEF2	23.8823	24.0387	24.7009	24.775	25.2735	25.8108	25.5659	25.7222	197	20	20	19	23.2	23.2	22	95.337	0	203.94	366120000	119	8136000	227830	224030	715970	715530	855190	1966300	957480	2473700
+	1.93148	-1.25427	Q14974	Q14974	Importin subunit beta-1	KPNB1	20.6371	20.9745	21.3549	21.1726	21.7167	22.8854	21.7719	22.7821	551	7	7	7	8.7	8.7	8.7	97.169	0	70.934	38496000	12	962400	33609	35146	111280	76966	108910	232820	68983	294680
+	1.22975	-1.25693	P04083	P04083	Annexin A1	ANXA1	18.2717	19.658	18.6552	20.6525	20.3433	20.6209	20.599	20.702	122	3	3	3	12.4	12.4	12.4	38.714	0	27.13	11233000	8	561650	11389	14791	28856	53034	95428	126300	68963	162890
+	1.46505	-1.25886	P51114;P51116	P51114;P51116	Fragile X mental retardation syndrome-related protein 1;Fragile X mental retardation syndrome-related protein 2	FXR1;FXR2	20.6285	20.7198	18.7964	19.988	21.1099	21.1503	21.2392	21.6686	356	3	3	2	4.7	4.7	3.4	69.72	0	20.853	19344000	10	690860	28581	26313	50881	44925	92899	139960	91931	215370
+	2.21049	-1.26045	P26038	P26038	Moesin	MSN	18.8707	19.1702	18.9424	18.7514	19.3201	20.5408	20.4918	20.4239	251	6	4	4	12	9.2	9.2	67.819	0	25.344	12348000	12	374170	5289.9	43780	41517	43506	55979	49352	45777	88974
+	0.872381	-1.26054	Q01844	Q01844	RNA-binding protein EWS	EWSR1	21.42	18.779	21.5838	21.779	21.8241	22.4282	21.8847	22.4669	486	2	2	2	3.5	3.5	3.5	68.477	0	18.132	36393000	11	2140800	118870	32286	216210	254560	235120	451270	215810	616630
+	2.38978	-1.26302	Q92945	Q92945	Far upstream element-binding protein 2	KHSRP	21.5179	22.0139	22.4938	22.7436	23.3966	23.4852	23.302	23.6375	659	9	9	7	17.4	17.4	14.3	73.114	0	71.056	83682000	29	2390900	32472	39996	156040	166780	363290	512250	326330	793750
+	3.13433	-1.27091	P31942	P31942	Heterogeneous nuclear ribonucleoprotein H3	HNRNPH3	19.5324	19.9462	19.6336	19.7812	20.9238	21.2934	20.5143	21.2455	278	3	3	3	11.3	11.3	11.3	36.926	0	36.795	14733000	11	982220	41586	27955	72237	76831	127290	226510	116700	293110
+	2.35404	-1.27098	Q05682	Q05682	Caldesmon	CALD1	19.2766	18.3071	19.5192	19.4536	20.5423	20.4482	20.3196	20.3305	496	2	2	2	4.4	4.4	4.4	93.23	0.0016807	11.982	8267200	3	306190	0	0	0	37726	59079	77996	39139	92254
+	1.84094	-1.27215	P52597	P52597	Heterogeneous nuclear ribonucleoprotein F;Heterogeneous nuclear ribonucleoprotein F, N-terminally processed	HNRNPF	19.6695	19.1944	20.6055	20.5274	21.2499	21.1962	20.9575	21.6817	370	4	2	2	14.5	8	8	45.671	0	26.992	18109000	2	1207300	15812	31987	102100	92147	202290	271360	127060	364500
+	3.87051	-1.27933	P25398	P25398	40S ribosomal protein S12	RPS12	21.6431	21.5125	21.8211	21.8543	23.2324	22.9772	22.6456	23.0931	249	3	3	3	30.3	30.3	30.3	14.515	0	49.788	67699000	32	9671200	456750	317750	852820	491510	1502100	2383700	789100	2877500
+	2.11021	-1.28176	P51991	P51991	Heterogeneous nuclear ribonucleoprotein A3	HNRNPA3	21.5783	21.6615	22.0865	22.7542	23.3176	23.5485	22.7725	23.5691	366	5	5	5	19	19	19	39.594	0	51.834	74728000	18	3933000	88524	111810	152070	355050	531440	1071300	489890	1132900
+	1.74936	-1.31658	P30530	P30530	Tyrosine-protein kinase receptor UFO	AXL	19.4125	19.9423	19.1478	18.76	19.6659	20.9442	21.0044	20.9143	273	2	2	2	3.2	3.2	3.2	98.336	0	13.545	10222000	4	292060	11585	0	8738.4	9714.2	20524	81818	53680	106000
+	1.85846	-1.32023	P40222	P40222	Alpha-taxilin	TXLNA	18.2529	18.5639	19.3645	19.2532	19.6733	20.5031	19.7557	20.7834	311	4	4	4	6.4	6.4	6.4	61.89	0	22.763	8120300	6	312320	5557.8	3612.9	11743	21243	49299	90662	35253	94951
+	1.64888	-1.34643	Q8NE71	Q8NE71	ATP-binding cassette sub-family F member 1	ABCF1	20.0081	20.4	18.4619	19.7824	20.7926	21.1549	20.776	21.3147	634	4	4	4	5.8	5.8	5.8	95.925	0	37.331	13628000	8	368330	15966	20456	0	8034	48170	90064	53498	132140
+	1.29182	-1.35475	Q13619;Q13620	Q13619;Q13620	Cullin-4A;Cullin-4B	CUL4A;CUL4B	20.7419	19.2606	18.0652	19.2785	20.9507	20.7249	20.6282	20.4613	529	4	4	4	5.8	5.8	5.8	87.679	0	22.735	11753000	6	244860	22870	5119.9	24979	1956.1	45395	53200	28375	62960
+	1.31444	-1.36201	Q8NCA5	Q8NCA5	Protein FAM98A	FAM98A	18.9853	19.222	20.6369	20.7628	20.614	21.7141	20.9046	21.8224	632	3	3	2	8.1	8.1	5.6	55.4	0	48.123	20058000	12	872080	19905	17165	64412	73863	71707	220990	93688	310350
+	3.03736	-1.3638	P23246	P23246	Splicing factor, proline- and glutamine-rich	SFPQ	23.4497	23.7507	24.062	24.1332	24.8199	25.3787	25.0965	25.5558	242	11	11	10	19.8	19.8	18.7	76.149	0	133.04	275840000	48	9194500	287550	302400	754570	703130	1128600	2055600	902300	3060400
+	1.42996	-1.36413	P27348;Q04917	P27348	14-3-3 protein theta	YWHAQ	20.0552	20.4124	21.6052	22.1292	22.133	22.6173	22.1838	22.7243	258	4	3	3	24.1	20.8	20.8	27.764	0	59.727	41509000	17	2964900	67270	66458	363670	352490	279700	649420	310010	875920
+	2.131	-1.37885	P62851	P62851	40S ribosomal protein S25	RPS25	20.7051	20.6091	20.4047	20.6966	20.9875	22.4007	22.0986	22.444	444	3	3	3	22.4	22.4	22.4	13.742	0	17.607	30683000	12	6136700	241140	175530	448370	554200	341870	1541500	753300	2080800
+	1.56609	-1.38072	Q9Y3I0	Q9Y3I0	tRNA-splicing ligase RtcB homolog	RTCB	20.2328	19.4913	21.1505	21.4669	21.6387	22.2828	21.7645	22.1784	776	4	4	4	9.3	9.3	9.3	55.21	0	26.809	29415000	6	1225600	17044	19420	138010	100510	116790	229800	188350	415700
+	1.784	-1.38527	Q14839;Q8TDI0;Q12873	Q14839;Q8TDI0	Chromodomain-helicase-DNA-binding protein 4;Chromodomain-helicase-DNA-binding protein 5	CHD4;CHD5	18.4338	19.7159	19.2596	20.3584	20.6409	21.1365	20.6811	20.8504	549	3	3	3	2	2	2	218	0	23.365	11667000	6	131090	1997.9	0	0	11148	21207	34070	19216	43451
+	2.10534	-1.38648	Q9BR76	Q9BR76	Coronin-1B	CORO1B	19.0973	18.4267	19.7688	18.7118	19.9647	20.3897	20.2625	20.9337	689	2	2	2	4.3	4.3	4.3	54.234	0.0016639	11.891	9340200	4	467010	0	0	44592	27054	49632	113020	64199	168510
+	1.98961	-1.39553	Q93009	Q93009	Ubiquitin carboxyl-terminal hydrolase 7	USP7	18.8286	19.1875	17.7952	19.2795	19.8953	20.2926	19.9031	20.5819	662	2	2	2	2.5	2.5	2.5	128.3	0	12.512	6951900	3	108620	0	0	5257.7	0	15328	34667	12121	41250
+	3.32012	-1.39803	P61247	P61247	40S ribosomal protein S3a	RPS3A	22.0435	22.4452	22.8505	22.7057	23.6882	24.111	23.7867	24.0512	408	7	7	7	25.8	25.8	25.8	29.945	0	88.387	107770000	30	6339600	117090	231460	563710	497380	823680	1609500	763820	1733000
+	3.44422	-1.40425	O43719	O43719	HIV Tat-specific factor 1	HTATSF1	19.1588	19.1662	19.3353	19.6627	20.4966	20.516	20.7658	21.1617	61	3	3	3	5.3	5.3	5.3	85.852	0	17.08	10758000	4	210950	0	0	3333.2	3862	26933	38057	20465	118300
+	1.17849	-1.42005	P56192	P56192	Methionine--tRNA ligase, cytoplasmic	MARS	18.4227	19.1572	18.5579	19.3893	21.214	20.6333	18.5718	20.7882	388	3	3	3	3.6	3.6	3.6	101.11	0	19.239	10703000	6	261060	0	0	17535	12040	57455	56446	30185	87396
+	2.26357	-1.42339	P26599;O95758	P26599	Polypyrimidine tract-binding protein 1	PTBP1	20.9536	21.0489	21.3428	21.6943	22.2799	23.233	22.0885	23.1317	254	6	6	6	14.7	14.7	14.7	57.221	0	74.206	49939000	22	2628400	43954	54762	153910	173560	286090	745990	314270	855850
+	1.64994	-1.43131	Q92499	Q92499	ATP-dependent RNA helicase DDX1	DDX1	18.4336	17.9176	19.0416	18.9365	19.2031	21.0651	19.7456	20.0407	649	1	1	1	2.4	2.4	2.4	82.431	0.0015129	11.107	6674900	3	171150	0	0	0	0	16407	71834	20404	62507
+	2.05054	-1.44612	P29401	P29401	Transketolase	TKT	21.4838	22.0489	22.476	22.6218	22.7687	23.9329	23.7679	23.9455	266	9	9	9	16.7	16.7	16.7	67.877	0	85.928	90195000	28	3607800	71601	142960	301030	400960	307890	938330	441350	1003700
+	2.73244	-1.49644	P67809;P16989	P67809;P16989	Nuclease-sensitive element-binding protein 1;Y-box-binding protein 3	YBX1;YBX3	19.9461	19.097	18.7023	18.993	20.912	20.6818	20.6749	20.4555	460	2	2	1	11.1	11.1	5.9	35.924	0	20.328	10053000	5	773290	51931	24882	37590	0	166960	170740	106090	215110
+	2.99216	-1.50613	Q86XP3	Q86XP3	ATP-dependent RNA helicase DDX42	DDX42	19.6699	18.9827	20.0082	19.5	21.0702	21.2182	20.6532	21.2438	618	6	6	6	11.1	11.1	11.1	102.97	0	36.364	12085000	6	274670	0	0	4365.2	0	26707	110430	41314	91856
+	1.31097	-1.53388	P07737	P07737	Profilin-1	PFN1	20.1649	19.0532	19.5517	21.3401	21.5171	22.3037	20.5278	21.8968	149	2	2	2	21.4	21.4	21.4	15.054	0	13.654	25082000	8	2786900	91809	113710	197240	364650	377890	745220	190720	705620
+	2.0253	-1.55484	Q9UHB9	Q9UHB9	Signal recognition particle subunit SRP68	SRP68	19.1837	18.7883	20.6404	19.1367	20.9543	21.1467	20.9332	20.9343	748	4	4	4	7.7	7.7	7.7	70.729	0	28.84	11424000	7	335990	0	0	35041	0	11040	110070	54631	125200
+	1.21211	-1.55668	P46063	P46063	ATP-dependent DNA helicase Q1	RECQL	18.7201	18.9167	21.0467	21.1747	21.2712	21.9053	21.3817	21.5268	329	2	2	2	2.9	2.9	2.9	73.457	0	12.758	22752000	10	650060	9317.9	14842	63138	72302	71638	143580	75561	199680
+	1.41737	-1.62047	Q9UMS4	Q9UMS4	Pre-mRNA-processing factor 19	PRPF19	19.7997	19.0376	21.219	21.365	21.5285	22.5019	21.6112	22.2616	757	5	5	5	20.4	20.4	20.4	55.18	0	32.191	31126000	13	1638200	0	16913	97015	158480	84793	512510	178350	590130
+	0.974114	-1.63698	Q9P035	Q9P035	Very-long-chain (3R)-3-hydroxyacyl-CoA dehydratase 3	HACD3	18.3226	18.7265	19.0874	19.5427	21.2209	21.5983	21.3033	18.1047	735	2	2	2	9.7	9.7	9.7	43.159	0	18.861	19596000	11	1306400	126240	106820	211580	211220	161800	264560	176570	47580
+	2.1344	-1.6386	O43684	O43684	Mitotic checkpoint protein BUB3	BUB3	19.1619	20.5296	20.2507	18.8627	21.1824	21.5129	21.2883	21.3757	59	4	4	4	14.6	14.6	14.6	37.154	0	22.758	15916000	6	1061100	12868	15118	48975	37402	133880	291150	159820	361830
+	2.69616	-1.64814	Q7KZF4	Q7KZF4	Staphylococcal nuclease domain-containing protein 1	SND1	21.6197	22.0206	22.5496	22.7944	23.8192	24.2185	23.4326	24.1065	607	15	15	15	22.1	22.1	22.1	102	0	133.61	109530000	63	2066600	27467	37358	156820	171340	224700	530730	226580	691620
+	1.02763	-1.6487	Q08945	Q08945	FACT complex subunit SSRP1	SSRP1	19.0833	18.1989	19.0953	20.4428	18.8952	21.9493	20.9214	21.6491	506	6	6	6	9.6	9.6	9.6	81.074	0	44.366	14422000	7	480720	0	0	8471.6	0	12280	163430	65437	231100
+	2.13165	-1.6682	Q9Y4P3	Q9Y4P3	Transducin beta-like protein 2	TBL2	19.6205	18.0145	19.9002	19.2482	20.8899	20.7139	20.8385	21.0139	779	2	2	2	5.6	5.6	5.6	49.797	0	13.303	12955000	4	498270	12968	20752	37155	47725	80600	87651	67177	144240
+	1.57722	-1.71513	P63241;Q6IS14;Q9GZV4	P63241;Q6IS14	Eukaryotic translation initiation factor 5A-1;Eukaryotic translation initiation factor 5A-1-like	EIF5A;EIF5AL1	21.0553	20.7525	22.5667	22.3242	22.4	24.1264	23.2706	23.7624	458	3	3	3	27.9	27.9	27.9	16.832	0	76.368	86539000	25	10817000	79122	105220	580650	885110	587180	3566000	1135200	3878900
+	1.03103	-1.71934	P14866	P14866	Heterogeneous nuclear ribonucleoprotein L	HNRNPL	19.2752	22.1853	22.5876	22.8252	23.0175	23.732	23.0124	23.9888	201	6	6	6	12.2	12.2	12.2	64.132	0	35.941	86170000	17	4308500	19431	99908	383170	545920	356850	984480	469370	1449400
+	1.56352	-1.72253	P15531;P22392	P15531;P22392	Nucleoside diphosphate kinase A;Nucleoside diphosphate kinase B	NME1;NME2	19.5595	19.3759	19.2374	21.7197	21.4769	21.8298	21.5903	21.8855	205	4	4	4	27	27	27	17.149	0	22.953	29308000	7	3256500	146160	173680	438010	631120	208690	621590	269380	767840
+	4.93517	-1.72312	P52292	P52292	Importin subunit alpha-1	KPNA2	20.8296	20.5422	20.786	20.326	22.2065	22.4167	22.4595	22.2936	368	5	5	5	15.7	15.7	15.7	57.861	0	81.432	33739000	16	1686900	77865	38498	120870	80955	223790	394410	260690	489850
+	1.4718	-1.72492	P08133	P08133	Annexin A6	ANXA6	20.4706	21.8075	22.705	22.7096	22.9977	24.3619	23.1323	24.1006	153	15	15	15	29.9	29.9	29.9	75.872	0	105.98	99127000	32	2305300	15779	28471	226660	206350	228300	636090	244340	719290
+	4.22313	-1.72666	Q15029	Q15029	116 kDa U5 small nuclear ribonucleoprotein component	EFTUD2	19.0476	18.7138	19.1756	18.8574	20.4344	20.7052	20.5014	21.0599	554	4	3	3	4.4	3.4	3.4	109.43	0	18.199	9821000	4	192570	0	0	2888.6	4902.5	20475	57795	26477	80031
+	1.58795	-1.74465	P43243	P43243	Matrin-3	MATR3	21.0107	21.2925	21.0487	18.8693	21.8912	22.237	22.3165	22.7552	323	7	7	7	10.2	10.2	10.2	94.622	0	47.399	36881000	19	996790	31919	33249	37704	29748	135450	205950	117540	405220
+	1.06846	-1.76458	P62937	P62937	Peptidyl-prolyl cis-trans isomerase A;Peptidyl-prolyl cis-trans isomerase A, N-terminally processed	PPIA	21.6439	18.4732	21.6483	21.2591	23.5259	22.53	21.6549	22.3722	452	3	3	3	21.8	21.8	21.8	18.012	0	26.076	42802000	14	4280200	327000	107280	615350	217440	1004300	925860	512750	570150
+	1.35423	-1.76998	P11413	P11413	Glucose-6-phosphate 1-dehydrogenase	G6PD	18.8833	18.8875	18.3273	20.218	19.1666	21.5872	21.1207	21.5216	186	6	6	6	11.1	11.1	11.1	59.256	0	35.413	14434000	10	412410	0	0	16664	20621	18188	154570	42984	159380
+	1.75103	-1.77237	Q96CX2;Q6ZWB6	Q96CX2	BTB/POZ domain-containing protein KCTD12	KCTD12	18.858	19.6907	18.8853	20.7263	20.8088	22.0832	20.7379	21.6199	672	5	5	5	20.6	20.6	20.6	35.7	0	40.858	19275000	12	1285000	17451	0	19780	41377	58287	496340	131490	520310
+	4.32937	-1.791	Q9NSD9	Q9NSD9	Phenylalanine--tRNA ligase beta subunit	FARSB	19.2432	19.3889	18.6965	18.9992	20.8431	20.8183	20.7226	21.1078	723	3	3	3	4.9	4.9	4.9	66.115	0	17.745	11437000	5	336370	5592.9	0	14091	9630.1	39381	82523	52865	132290
+	2.29959	-1.80254	P55265	P55265	Double-stranded RNA-specific adenosine deaminase	ADAR	20.3617	20.438	21.2617	20.8766	21.948	22.6874	22.0132	23.4995	385	9	9	9	11.1	11.1	11.1	136.06	0	65.938	44162000	22	640030	5634.3	5077.2	22904	12848	78693	185270	108130	221480
+	2.31975	-1.80589	Q8NC51	Q8NC51	Plasminogen activator inhibitor 1 RNA-binding protein	SERBP1	21.1184	21.0409	21.0211	21.0344	22.0538	23.765	22.2702	23.3494	631	7	7	7	20.8	20.8	20.8	44.965	0	50.583	54910000	9	3050600	73924	66985	112740	103690	445330	996270	321610	930020
+	3.05789	-1.81408	Q8WX93	Q8WX93	Palladin	PALLD	18.9546	19.7206	19.6679	18.6782	20.8265	21.3882	20.8272	21.2357	648	5	5	5	4	4	4	150.56	0	29.467	12928000	7	205200	0	0	0	6973.8	15800	68266	29507	84656
+	3.80329	-1.82619	P06748	P06748	Nucleophosmin	NPM1	24.2285	23.8126	24.0331	24.2821	25.6041	26.165	25.5767	26.3152	143	6	6	6	28.9	28.9	28.9	32.575	0	323.31	479930000	146	39994000	1471900	1024600	2305300	2662600	4452000	10080000	4568700	13430000
+	3.05645	-1.82679	Q08211	Q08211	ATP-dependent RNA helicase A	DHX9	23.6961	24.0855	24.7034	24.6815	25.6931	26.4291	25.9878	26.3637	504	25	25	25	24.2	24.2	24.2	140.96	0	323.31	495340000	138	8120300	93583	209330	513540	515070	1038800	2060600	927050	2762300
+	3.55021	-1.84051	O60506	O60506	Heterogeneous nuclear ribonucleoprotein Q	SYNCRIP	22.9477	23.0086	23.8609	23.4144	24.8661	25.287	25.0347	25.4057	73	14	14	11	29.5	29.5	25	69.602	0	161.3	249480000	57	7796200	118150	143650	546930	541720	899460	1943000	922000	2681300
+	2.25628	-1.85372	Q12906	Q12906	Interleukin enhancer-binding factor 3	ILF3	19.1026	19.5541	19.3975	18.4614	20.3096	21.4848	20.3997	21.7363	516	4	4	4	4.8	4.8	4.8	95.337	0	23.578	14602000	9	394640	2301.6	0	16600	13479	39739	107510	37168	177840
+	2.69119	-1.86308	P09874	P09874	Poly [ADP-ribose] polymerase 1	PARP1	21.8434	22.2042	22.6664	23.2324	23.8271	24.6474	24.2648	24.6594	166	12	12	12	14	14	14	113.08	0	143.56	148670000	56	2915100	34632	46651	115190	219050	298530	794770	344470	1061800
+	2.91127	-1.8644	Q86UP2	Q86UP2	Kinectin	KTN1	19.2596	19.973	18.4584	19.597	21.1062	21.152	21.3036	21.184	615	4	4	4	4.3	4.3	4.3	156.27	0	24.629	14542000	7	175210	5086.6	3240.8	5991.5	5988.3	17175	47681	28069	61973
+	2.1101	-1.86619	P98175	P98175	RNA-binding protein 10	RBM10	19.3228	19.1491	20.2559	20.6058	21.0565	21.8706	21.3635	22.5079	477	6	6	6	8.4	8.4	8.4	103.53	0	56.573	23554000	10	603960	0	0	8745.7	19976	76302	166680	92693	239570
+	2.1086	-1.88568	O43670	O43670	BUB3-interacting and GLEBS motif-containing protein ZNF207	ZNF207	20.1492	19.1384	20.8514	21.1425	21.8959	22.2288	21.9944	22.705	58	4	4	4	9.4	9.4	9.4	50.75	0	33.363	33626000	20	2401800	16929	15230	105670	130250	338320	596730	309040	889680
+	1.53849	-1.90546	Q99613;B5ME19	Q99613;B5ME19	Eukaryotic translation initiation factor 3 subunit C;Eukaryotic translation initiation factor 3 subunit C-like protein	EIF3C;EIF3CL	19.6466	20.9545	18.3699	21.0685	21.5713	21.8453	21.7373	22.5075	4	6	6	6	7.7	7.7	7.7	105.34	0	46.273	27970000	9	665940	4642.1	8533.1	7947.8	23521	76800	165580	102650	276270
+	2.12993	-1.92299	P29692	P29692	Elongation factor 1-delta	EEF1D	21.8973	21.8176	20.0686	22.032	23.3707	23.2588	23.1076	23.7704	267	8	8	8	38.1	38.1	38.1	31.121	0	94.362	73830000	24	4614400	111570	58964	52184	203170	599260	1214900	625440	1748900
+	3.78769	-1.94665	Q13283	Q13283	Ras GTPase-activating protein-binding protein 1	G3BP1	21.9745	21.711	22.1209	22.3434	23.5299	24.2173	23.8118	24.3775	525	8	8	8	24	24	24	52.164	0	82.953	110650000	36	5029600	121960	73822	208380	258590	568830	1207500	698470	1892000
+	1.75276	-1.96925	P27816	P27816	Microtubule-associated protein 4	MAP4	19.8102	18.401	21.3154	20.0263	21.5516	21.9226	21.8546	22.1011	263	5	5	5	5.6	5.6	5.6	121	0	32.004	25273000	11	394890	0	4555.5	20397	12745	32719	122780	63252	138440
+	2.89233	-1.99398	Q16891	Q16891	MICOS complex subunit MIC60	IMMT	18.3673	19.1222	19.334	19.3134	20.3111	20.9359	21.4926	21.3734	578	4	4	4	6.1	6.1	6.1	83.677	0	25.09	15651000	8	355720	0	0	44346	38750	27984	68106	57703	118830
+	2.65604	-2.00061	P38159;Q96E39;O75526;Q8IZ40;Q8N7X1	P38159;Q96E39	RNA-binding motif protein, X chromosome;RNA-binding motif protein, X chromosome, N-terminally processed;RNA binding motif protein, X-linked-like-1	RBMX;RBMXL1	21.051	20.9857	21.5994	22.2283	22.7254	23.7614	23.4619	23.9182	306	8	8	8	19.7	19.7	19.7	42.331	0	65.993	79872000	29	3194900	57859	43260	179110	268220	366200	770960	333170	1176100
+	2.01276	-2.03483	O75643	O75643	U5 small nuclear ribonucleoprotein 200 kDa helicase	SNRNP200	18.9186	19.5357	20.9474	20.7164	21.6787	22.4512	21.5757	22.5517	91	10	10	10	6.3	6.3	6.3	244.5	0	83.868	30569000	15	259060	0	941.16	10992	9851.7	21888	74627	34969	105790
+	2.43281	-2.04701	P30153;P30154	P30153;P30154	Serine/threonine-protein phosphatase 2A 65 kDa regulatory subunit A alpha isoform;Serine/threonine-protein phosphatase 2A 65 kDa regulatory subunit A beta isoform	PPP2R1A;PPP2R1B	18.506	19.9304	20.2551	19.6112	21.1528	22.1761	21.3434	21.8184	271	4	4	4	9.7	9.7	9.7	65.308	0	24.584	18844000	6	588870	3302	0	6999	5174.9	67900	200990	82744	221760
+	2.85599	-2.04935	Q14444	Q14444	Caprin-1	CAPRIN1	22.4547	23.0956	23.8095	23.8957	25.0218	25.6862	25.2685	25.4763	541	11	11	11	18.2	18.2	18.2	78.365	0	135.5	277400000	70	13209000	194000	250650	812930	849380	1770300	3567200	1793200	3971800
+	5.04296	-2.08298	O75533	O75533	Splicing factor 3B subunit 1	SF3B1	21.2871	21.2327	21.1776	21.5296	23.0377	23.4974	23.3772	23.6467	89	14	14	14	14.5	14.5	14.5	145.83	0	99.088	70077000	27	1130300	25499	13182	24175	48637	187650	270370	154990	405760
+	1.61275	-2.13941	P84077;P61204;P84085	P84077;P61204;P84085	ADP-ribosylation factor 1;ADP-ribosylation factor 3;ADP-ribosylation factor 5	ARF1;ARF3;ARF5	18.2741	19.0249	21.5688	19.1993	21.8461	21.6601	21.5444	21.574	405	5	2	2	40.9	13.3	13.3	20.697	0.0016529	11.793	26959000	10	2695900	132050	170280	393450	300670	353940	514530	262050	568970
+	2.51208	-2.1521	P50991	P50991	T-complex protein 1 subunit delta	CCT4	18.482	18.7442	18.1209	19.9235	20.2934	21.2037	21.1988	21.1832	354	4	4	4	8	8	8	57.924	0	29.257	10892000	5	330060	0	0	19157	11861	0	87747	74498	136800
+	2.08302	-2.15873	P62277	P62277	40S ribosomal protein S13	RPS13	18.0673	19.9073	18.4705	20.291	21.0583	21.7123	21.3589	21.2415	429	2	2	2	12.6	12.6	12.6	17.222	0	14.075	19179000	5	2131000	88147	94139	186210	195030	244710	510500	276230	536030
+	4.69911	-2.1648	O00267	O00267	Transcription elongation factor SPT5	SUPT5H	18.8832	19.1957	18.6901	19.2949	20.9517	21.2864	21.0385	21.4465	28	6	6	6	8.8	8.8	8.8	121	0	53.066	14480000	6	283930	0	0	8394.9	5430.6	21660	80732	35231	132480
+	2.58419	-2.18545	Q9Y262	Q9Y262	Eukaryotic translation initiation factor 3 subunit L	EIF3L	19.847	21.2987	21.3414	21.2886	22.3968	23.4746	23.2447	23.4013	766	11	11	11	22	22	22	66.726	0	117.07	62051000	39	2139700	17870	30478	110230	91258	225160	609840	270560	784300
+	2.67603	-2.191	O43390	O43390	Heterogeneous nuclear ribonucleoprotein R	HNRNPR	20.6662	20.6963	21.5991	21.5676	23.1906	23.9555	22.4362	23.7109	56	11	8	8	22.7	18.3	18.3	70.942	0	60.315	72786000	22	2140800	21705	15259	81311	109820	210220	735720	266520	700210
+	3.66464	-2.20047	P12956	P12956	X-ray repair cross-complementing protein 6	XRCC6	21.7077	21.8402	22.1092	22.3388	23.5236	24.4536	24.2096	24.6109	195	15	15	15	28.1	28.1	28.1	69.842	0	136.73	129790000	48	4055900	40777	53515	176010	185690	399710	1046300	515110	1638800
+	1.28505	-2.20049	P05198	P05198	Eukaryotic translation initiation factor 2 subunit 1	EIF2S1	18.8598	19.2982	22.3796	21.8777	22.4792	23.2032	22.5094	23.0255	135	6	6	6	21.6	21.6	21.6	36.112	0	47.775	52427000	20	2383000	0	0	147740	82630	306670	705260	313810	826940
+	2.46482	-2.22855	P21291	P21291	Cysteine and glycine-rich protein 1	CSRP1	20.0945	18.0054	19.498	18.5627	21.3045	21.3942	21.3905	20.9856	232	2	2	2	15.5	15.5	15.5	20.567	0	15.517	15693000	7	1307800	47212	50369	74320	60581	215670	313990	204230	341390
+	1.50968	-2.22864	P08865	P08865	40S ribosomal protein SA	RPSA	22.3236	18.948	19.0591	19.922	22.3871	22.5588	21.9632	22.2583	161	5	5	5	21.4	21.4	21.4	32.854	0	69.862	42426000	13	3263500	231610	200910	329600	254790	340820	829410	332250	744150
+	2.49032	-2.30166	Q15459	Q15459	Splicing factor 3A subunit 1	SF3A1	19.0124	18.3829	20.3544	19.8321	21.4215	21.4663	21.5598	22.3408	567	7	7	7	11.2	11.2	11.2	88.885	0	43.742	21857000	8	533100	0	5300.1	14158	13719	81899	116060	69831	232140
+	1.75084	-2.31688	Q6PKG0;Q659C4	Q6PKG0	La-related protein 1	LARP1	19.69	18.9524	21.5093	21.7642	22.252	22.8888	22.8282	23.2144	600	7	7	7	7.5	7.5	7.5	123.51	0	47.823	49285000	19	821420	6357.4	5637.9	33683	53477	104390	191260	115510	311090
+	4.74252	-2.35061	Q9BY44	Q9BY44	Eukaryotic translation initiation factor 2A;Eukaryotic translation initiation factor 2A, N-terminally processed	EIF2A	18.6688	19.0712	18.285	18.4636	20.7174	21.0743	20.9706	21.1287	698	4	4	4	9.1	9.1	9.1	64.989	0	25.743	11753000	6	367290	6239.7	0	8270.7	8668.9	49552	105770	58348	130440
+	1.90705	-2.43867	Q53EL6	Q53EL6	Programmed cell death protein 4	PDCD4	19.3542	19.2907	21.2091	21.3971	21.8246	23.375	22.4059	23.4003	583	8	8	8	24.7	24.7	24.7	51.735	0	86.875	50533000	21	2197100	0	4645.4	151580	90326	146260	699850	262810	841600
+	1.58957	-2.44246	P24534	P24534	Elongation factor 1-beta	EEF1B2	19.3295	19.5406	18.6739	18.4327	19.0828	22.3305	22.2417	22.0914	246	4	4	4	24.4	24.4	24.4	24.763	0	62.823	21918000	7	1826500	36696	0	32534	36309	55305	626610	391800	647210
+	3.55985	-2.4711	P78347	P78347	General transcription factor II-I	GTF2I	18.1873	18.7343	18.9307	19.7233	21.1684	21.4479	21.4983	21.3454	469	5	5	5	7.5	7.5	7.5	112.42	0	37.912	14653000	10	305280	0	3732	0	8398.8	45133	88557	56968	102490
+	5.38131	-2.50086	P46783;Q9NQ39	P46783	40S ribosomal protein S10	RPS10	20.1043	19.8886	19.9727	20.0107	22.1377	22.6813	22.3549	22.8058	335	3	3	3	23	23	23	18.898	0	31.694	36292000	20	4536500	150270	99267	216700	217330	506770	1144400	530950	1670800
+	1.24799	-2.54589	P50914	P50914	60S ribosomal protein L14	RPL14	19.6099	18.7794	18.6	18.1458	22.0573	18.2477	22.7006	22.313	352	2	2	2	11.2	11.2	11.2	23.432	0	20.598	37946000	6	6324300	720420	381710	489180	669290	762910	689530	969470	1641800
+	2.16988	-2.55658	P07910;P0DMR1;O60812;B7ZW38;B2RXH8	P07910;P0DMR1;O60812;B7ZW38;B2RXH8	Heterogeneous nuclear ribonucleoproteins C1/C2;Heterogeneous nuclear ribonucleoprotein C-like 4;Heterogeneous nuclear ribonucleoprotein C-like 1;Heterogeneous nuclear ribonucleoprotein C-like 3;Heterogeneous nuclear ribonucleoprotein C-like 2	HNRNPC;HNRNPCL4;HNRNPCL1;HNRNPCL3;HNRNPCL2	18.9669	19.5716	20.9793	21.4806	22.2975	23.0888	22.5478	23.2907	152	5	5	5	18.3	18.3	18.3	33.67	0	33.968	52449000	25	3085300	0	8810.6	102900	67528	422910	775410	354390	1353300
+	2.49192	-2.66886	Q9Y5B9	Q9Y5B9	FACT complex subunit SPT16	SUPT16H	18.9213	19.5163	19.2981	21.0274	21.6691	22.7563	21.9688	23.0444	780	8	8	8	10	10	10	119.91	0	69.771	35335000	17	654360	0	0	7894.1	23183	77041	192930	82093	271220
+	3.28535	-3.29753	P49736	P49736	DNA replication licensing factor MCM2	MCM2	20.5912	20.3823	21.3784	21.5753	23.6753	24.6027	23.6013	25.238	347	17	17	17	24.9	24.9	24.9	101.89	0	163.75	138000000	44	3136400	12368	15456	76944	88885	374680	871600	387350	1309100
+	4.37912	-3.7599	Q14103	Q14103	Heterogeneous nuclear ribonucleoprotein D0	HNRNPD	17.9779	19.475	19.0696	18.6435	22.1617	22.6525	22.4943	22.8971	533	3	2	2	8.5	6.2	6.2	38.434	0	47.517	43615000	22	3355000	95452	76701	272380	290510	360670	758310	393520	1107400
+	3.81424	-3.84716	Q9Y2W1	Q9Y2W1	Thyroid hormone receptor-associated protein 3	THRAP3	19.4867	20.0347	17.9128	18.9952	22.7624	22.9831	22.9557	23.1169	773	7	7	7	8.1	8.1	8.1	108.66	0	47.793	45454000	19	1082200	12266	9229.3	14908	13805	170280	280630	170220	410900
+	4.20433	-4.24636	Q07666	Q07666	KH domain-containing, RNA-binding, signal transduction-associated protein 1	KHDRBS1	18.8677	18.5113	19.2726	20.338	23.1875	23.8941	23.2377	23.6557	503	2	2	2	12.2	12.2	12.2	48.227	0	37.487	67988000	8	6180800	29140	38480	124400	116970	998640	1986000	778400	2108700
